# Supplementary material for: Photo-mediated synthesis of 1,2-dideoxy-2-phosphinylated carbohydrates from glycals: the reduction of glycosyl radicals to glycosyl anions
Source: Royal Society of Chemistry journal article supplement (doi:10.1039/d2gc01513g), 2022-01-01
Supplement: d2gc01513g1.pdf [file d2gc01513g1.pdf]

## Supporting Information

### Photo-Medicated Synthesis of 1,2-Dideoxy-2-phosphinylated Carbohydrates from Glycals: The Reduction of Glycosyl Radicals to Glycosyl Anions

Hai Li<sup>a</sup>, Kai-Cheng Yu<sup>a</sup>, Jia-Kun Su<sup>c</sup>, Wei Ouyang<sup>a</sup>, Nai-Li Fan<sup>a\*</sup> and Xiang-Guo Hu<sup>ab\*</sup>

<sup>a.</sup> *National Engineering Research Center for Carbohydrate Synthesis, Jiangxi Normal University, Nanchang, 330022, China. E-mail: Xiangguo.hu@jxnu.edu.cn*

## Contents

|                                                                                                                    |    |
|--------------------------------------------------------------------------------------------------------------------|----|
| 1. General Information.....                                                                                        | 2  |
| 2. Experimental Section.....                                                                                       | 3  |
| 2.1 General procedure for the synthesis of phosphorylated carbohydrates from protected glycals.....                | 3  |
| 2.2 General procedure for the synthesis of phosphorylated carbohydrates from various diaryl phosphines oxides..... | 3  |
| 2.3 Procedure for the gram scale reaction.....                                                                     | 4  |
| 2.4 Procedure for the late-stage modification.....                                                                 | 5  |
| 2.5 Mechanistic studies.....                                                                                       | 6  |
| 2.5.1 Radical trapping experiments.....                                                                            | 6  |
| 2.5.2 Experiments that indicate the presence of the anion intermediate.....                                        | 7  |
| 3. Computational Details.....                                                                                      | 11 |
| 4. References.....                                                                                                 | 17 |
| 5. Copies of NMR Spectra.....                                                                                      | 18 |
| 6. Structure Determination and Representative 2D NMR Spectra.....                                                  | 68 |
| 7. X-ray Structure of 3c, 3j.....                                                                                  | 81 |



## 1. General Information

All purchased reagents were used without further purification unless otherwise noted. All solvents were dried over 4Å molecular sieves before used unless stated. Reactions were stirred using Teflon-coated magnetic stirrers. Analytical TLC was performed with 0.20 mm silica gel 60F plates with a 254 nm fluorescent indicator. TLC plates were visualized by ultraviolet light or by treatment with a spray of Pancaldi reagent  $\{(\text{NH}_4)_6\text{MoO}_4, \text{Ce}(\text{SO}_4)_2, \text{H}_2\text{SO}_4, \text{H}_2\text{O}\}$  or a solution 10%  $\text{H}_2\text{SO}_4$  in ethanol. Chromatographic purification of products was carried out by flash column chromatography on silica gel (200-300 mesh). Melting points were determined using a WRX-4 visual melting point apparatus. Both melting points and boiling points are uncorrected. Infrared spectra were recorded on an IR Affinity-1. spectra were measured in  $\text{CDCl}_3$  (TMS,  $^1\text{H}$   $\delta$  = 0;  $\text{CDCl}_3$ ,  $^1\text{H}$   $\delta$  = 7.26,  $^{13}\text{C}$   $\delta$  = 77.16) or  $\text{DMSO-d}_6$  (TMS,  $^1\text{H}$   $\delta$  = 0;  $\text{DMSO-d}_6$ ,  $^1\text{H}$   $\delta$  = 2.50,  $^{13}\text{C}$   $\delta$  = 39.52) or Methanol- $\text{d}_4$  (TMS,  $^1\text{H}$   $\delta$  = 0; Methanol- $\text{d}_4$ ,  $^1\text{H}$   $\delta$  = 3.31,  $^{13}\text{C}$   $\delta$  = 49.00) on a Bruker AV 400 ( $^1\text{H}$  at 400 MHz,  $^{13}\text{C}$  at 100 MHz,  $^{31}\text{P}$  at 162 MHz,  $^{19}\text{F}$  at 376 MHz) magnetic resonance spectrometer. Chemical shifts ( $\delta$ ) are reported in ppm, and coupling constants ( $J$ ) are in Hz. The following abbreviations were used to explain the multiplicities: s = singlet, d = doublet, t = triplet, q = quartet, m = multiplet. ESI mass spectra were recorded on an AB sciex Triple-TOF 5600+ mass instrument. Photochemical reactions were performed by cylindrical LED strips kit (360-420 nm, 45 W), or simply by placing LED lamps (45 W 360-420 nm blue, purchased from Shenzhen Hongye Optoelectronics Technology Corporation) approximately 6 cm away from reaction tube; the temperature of the reaction was maintained at approximately 25 °C by fans.

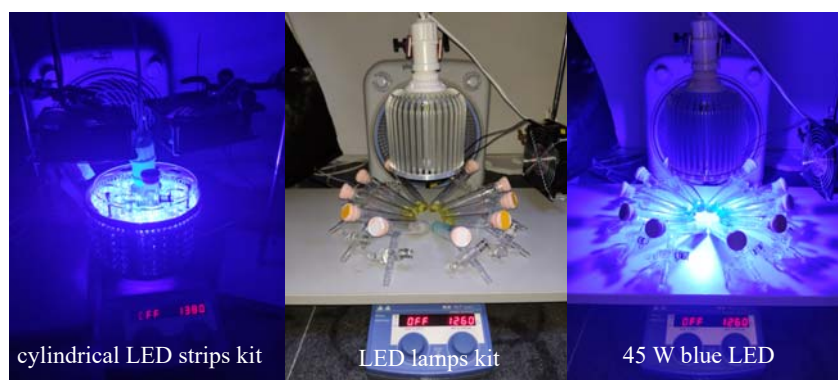



## 2. Experimental Section

### 2.1 General procedure for the synthesis of phosphinylated carbohydrates from protected glycals

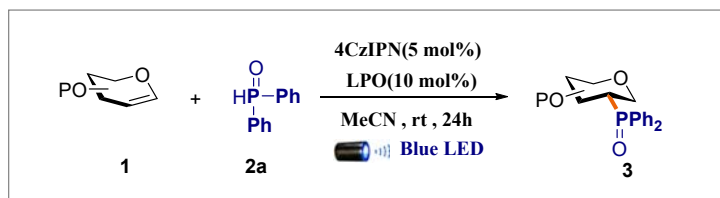

To a dried Schlenk tube equipped with a stir bar, glycal **1** (0.2 mmol, 1.0 equiv), 4CzIPN (8 mg, 0.01 mmol, 5 mol%), phosphine oxide **2a** (81 mg, 0.4 mmol, 2.0 equiv), dilauroyl peroxide (LPO) (8 mg, 0.02 mmol, 0.1 equiv) was added. The Schlenk tube was capped with a rubber septum. After evacuated and backfilled with N<sub>2</sub> three times via branch, degassed acetonitrile (2 mL) was added via a syringe. The reaction was irradiated with Blue LED lamps (45 W) for 24 hours and monitored by TLC. The temperature was kept under 25 °C by fans. After the reaction was completed, organic layers were concentrated under reduced pressure and the residue was purified with chromatography column on silica gel (200-300 mesh) or preparative TLC to afford products **3**.

### 2.2 General procedure for the synthesis of phosphinylated carbohydrates from various diaryl phosphines oxides

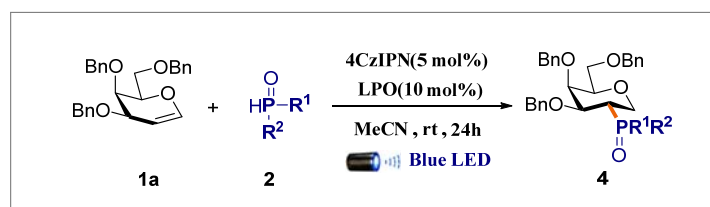

To a dried Schlenk tube equipped with a stir bar, glycal **1a** (0.2 mmol, 1.0 equiv), 4CzIPN (8 mg, 0.01 mmol, 5 mol%), phosphine oxide **2** (0.4 mmol, 2.0 equiv), LPO (8 mg, 0.02 mmol, 0.1 equiv) was added. The Schlenk tube was capped with a rubber septum. After evacuated and backfilled with N<sub>2</sub> three times via branch, degassed acetonitrile (2 mL) was added via a syringe.



The reaction was irradiated with Blue LED lamps (45 W) for 24 hours and monitored by TLC. The temperature was kept under 25 °C by fans. After the reaction was completed, organic layers were concentrated under reduced pressure and the residue was purified with chromatography column on silica gel (200-300 mesh) or preparative TLC to afford products **4**.

### 2.3 Procedure for the gram scale reaction

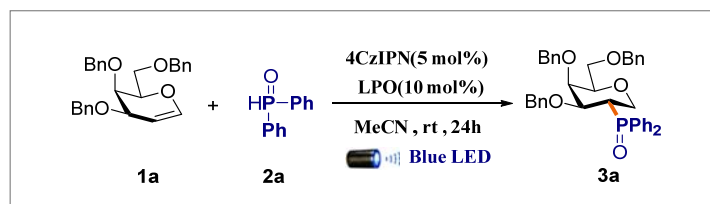

To a dried 50 mL Schlenk tube equipped with a stir bar, glycal **1a** (1.249 g, 3.0 mmol, 1.0 equiv), 4CzIPN (118 mg, 0.15 mmol, 5 mol%), phosphine oxide **2a** (1.213 g, 6.0 mmol, 2.0 equiv), LPO (120 mg, 0.3 mmol, 0.1 equiv) was added. The Schlenk tube was capped with a rubber septum. After evacuated and backfilled with N<sub>2</sub> three times via branch, degassed acetonitrile (30 mL) was added via a syringe. The reaction was irradiated with Blue LED lamps (45 W) for 24 hours and monitored by TLC. The temperature was maintained under 25 °C by fans. After the reaction was completed, organic layers were concentrated under reduced pressure and the residue was purified with chromatography column (Hexane /EtOAc = 1:1) on 200-300 mesh silica gel to afford product **3a** (1.24 g, 67% yield).

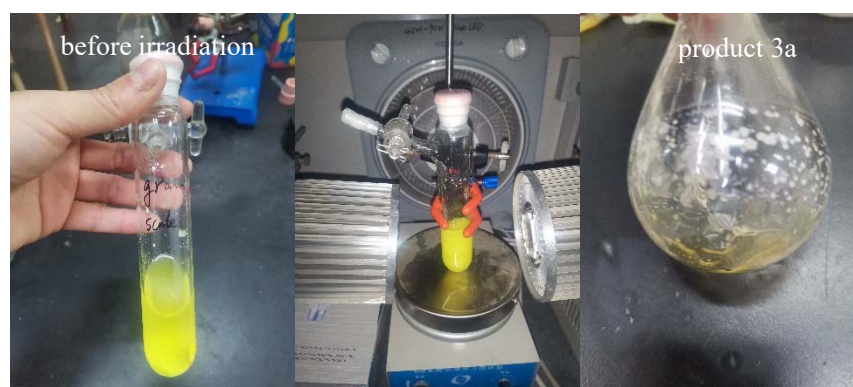



## 2.4 Procedure for the late-stage modification

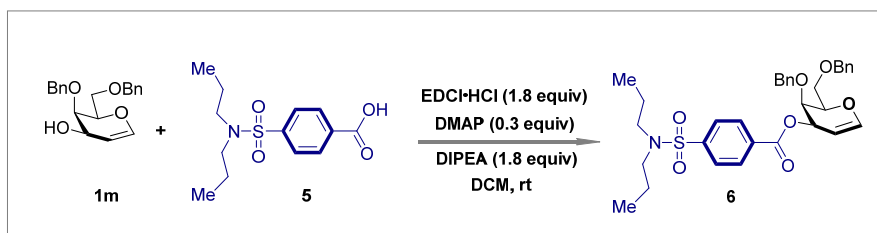

To a solution of compound **1m** (261 mg, 0.800 mmol, 1.00 equiv) in dry DCM (4.00 mL, 0.20 M) were added Probenecid **5** (274 mg, 0.960 mmol, 1.20 equiv), DMAP (29.3 mg, 0.240 mmol, 0.300 equiv), EDCI·HCl (276 mg, 1.44 mmol, 1.80 equiv) and DIPEA (0.25 mL, 1.44 mmol, 1.80 equiv). After stirring at room temperature for 12 h, the reaction mixture was diluted with DCM and washed with saturated NaHCO<sub>3</sub> and brine successively. The organic phase was dried over Na<sub>2</sub>SO<sub>4</sub>, filtered, and concentrated in vacuo. The residue was purified by silica gel column chromatograph Hexanes: EtOAc [3:1 (v/v)] to give **6** (475 mg, 88% yield) as a colorless oil.

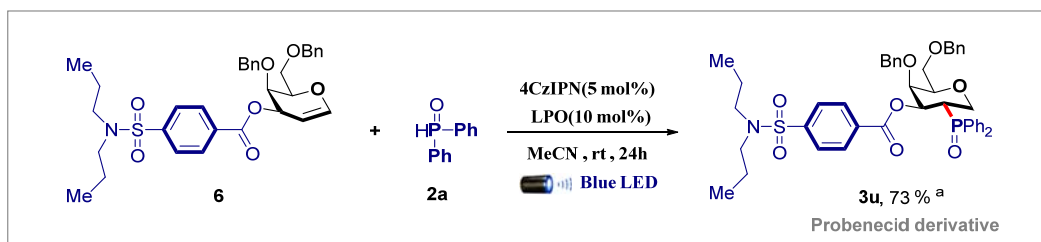

To a dried Schlenk tube equipped with a stir bar, glycol **6** (119 mg, 0.2 mmol, 1.0 equiv), 4CzIPN (8 mg, 0.01 mmol, 5 mol%), phosphine oxide **2a** (81 mg, 0.4 mmol, 2.0 equiv), LPO (8 mg, 0.02 mmol, 0.1 equiv) was added. The Schlenk tube was capped with a rubber septum. After evacuated and backfilled with N<sub>2</sub> three times via branch, degassed acetonitrile (2 mL) was added via a syringe. The reaction was irradiated with Blue LED lamps (45 W) for 24 hours and monitored by TLC. The temperature was kept under 25 °C by fans. After the reaction was completed, organic layers were concentrated under reduced pressure and the residue was purified with chromatography column on silica gel (200-300 mesh) or preparative TLC to afford products **3u** (116 mg, 73% yield).



## 2.5 Mechanistic studies

### 2.5.1 Radical trapping experiments

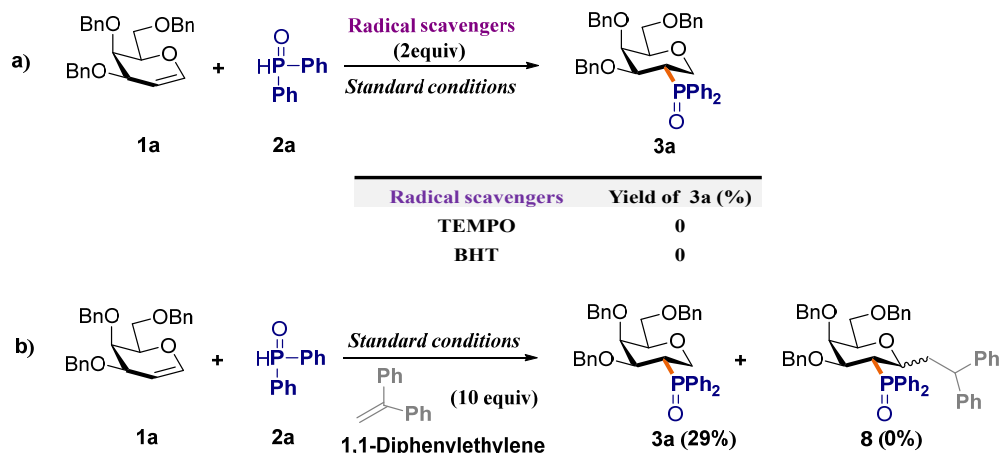

**(I)** With TEMPO: To a dried Schlenk tube equipped with a stir bar, glycal **1a** (83 mg, 0.2 mmol, 1.0 equiv), 4CzIPN (8 mg, 0.01 mmol, 5 mol%), phosphine oxide **2a** (81 mg, 0.4 mmol, 2.0 equiv), LPO (8 mg, 0.02 mmol, 0.1 equiv) was added, followed by the addition of TEMPO (2.0 equiv). The Schlenk tube was capped with a rubber septum. After evacuated and backfilled with N<sub>2</sub> three times via branch, degassed acetonitrile (2 mL) was added via a syringe. The reaction was irradiated with Blue LED lamps (45W) for 24 hours and monitored by TLC. The temperature was kept under 25 °C by fans. After the reaction was completed, organic layers were concentrated under reduced pressure and the residue was purified with chromatography column on silica gel (200-300 mesh) failed to obtain **3a**.

**(II):** The control experiment with 2.0 equiv BHT failed to obtain **3a**.

**(III):** With 1,1-Diphenylethylene: To a dried Schlenk tube equipped with a stir bar, glycal **1a** (83 mg, 0.2 mmol, 1.0 equiv), 4CzIPN (8 mg, 0.01 mmol, 5 mol%), phosphine oxide **2a** (81 mg, 0.4 mmol, 2.0 equiv), LPO (8 mg, 0.02 mmol, 0.1 equiv) was added, followed by the addition of 1,1-Diphenylethylene (360mg, 2equiv, 10.0 equiv). The Schlenk tube was capped with a rubber septum. After evacuated and backfilled with N<sub>2</sub> three times via branch, degassed acetonitrile (2 mL) was added via a syringe. The reaction was irradiated with Blue LED lamps (45W) for 24 hours under 25 °C and monitored by TLC. After the reaction was completed, concentrated organic layers under reduced pressure and the residue was purified with chromatography column on silica gel (200-300 mesh, petroleum ether/AcOEt = 1:2) to afford



**3a**(36 mg, 29% yield).

## 2.5.2 Experiments that indicate the presence of the anion intermediate

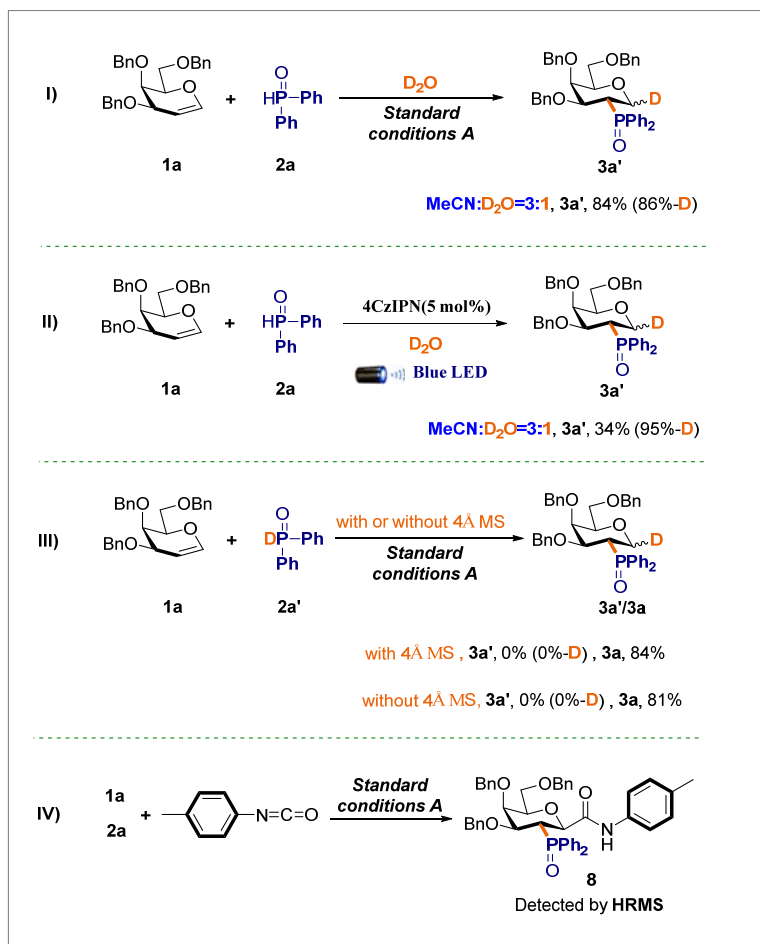

**(I)** To a dried Schlenk tube equipped with a stir bar, glycal **1a** (83 mg, 0.2 mmol, 1.0 equiv), phosphine oxide **2a** (81 mg, 0.4 mmol, 2.0 equiv), 4CzIPN (8 mg, 0.01 mmol, 5 mol%), LPO (8 mg, 0.02 mmol, 0.1 equiv) was added. The Schlenk tube was capped with a rubber septum. After evacuated and backfilled with N<sub>2</sub> three times via branch, degassed acetonitrile (1.5 mL) and D<sub>2</sub>O (0.5 mL) were added via a syringe. The reaction was irradiated with Blue LED lamps (45W) for 24 hours under 25 °C and monitored by TLC. After the reaction was completed, organic layers were concentrated under reduced pressure and the residue was purified with chromatography column on silica gel (200-300 mesh, Hexane /EtOAc = 1:1) to afford **3a'** (104 mg, 84% yield, 86% [D], light yellow syrup).

**(II)** To a dried Schlenk tube equipped with a stir bar, glycal **1a** (83 mg, 0.2 mmol, 1.0 equiv), phosphine oxide **2a** (81 mg, 0.4 mmol, 2.0 equiv), 4CzIPN (8 mg, 0.01 mmol, 5 mol%),



was added. The Schlenk tube was capped with a rubber septum. After evacuated and backfilled with N<sub>2</sub> three times via branch, degassed acetonitrile (1.5 mL) and D<sub>2</sub>O (0.5 mL) were added via a syringe. The reaction was irradiated with Blue LED lamps (45W) for 24 hours under 25 °C and monitored by TLC. After the reaction was completed, organic layers were concentrated under reduced pressure and the residue was purified with chromatography column on silica gel (200-300 mesh, Hexane /EtOAc = 1:1) to afford **3a'** (42 mg, 34% yield, 95% [D], light yellow syrup).

**(III)** To a dried Schlenk tube equipped with a stir bar, glycal **1a** (83 mg, 0.2 mmol, 1.0 equiv), 4CzIPN (8 mg, 0.01 mmol, 5 mol%), phosphine oxide **2a** (81 mg, 0.4 mmol, 2.0 equiv), LPO (8 mg, 0.02 mmol, 0.1 equiv) was added, followed by the addition of 4 Å MS (100 mg). The Schlenk tube was capped with a rubber septum. After evacuated and backfilled with N<sub>2</sub> three times via branch, degassed acetonitrile (1.5 mL) and D<sub>2</sub>O (0.5 mL) was added via a syringe. The reaction was irradiated with Blue LED lamps (45 W) for 24 hours under 25 °C and monitored by TLC. After the reaction was completed, concentrated organic layers under reduced pressure and the residue was purified with chromatography column on silica gel (200-300 mesh, Hexane /EtOAc = 1:1) to afford **3a** (104 mg, 84% yield).

**(IV)** To a dried Schlenk tube equipped with a stir bar, glycal **1a** (83 mg, 0.2 mmol, 1.0 equiv), 4CzIPN (8 mg, 0.01 mmol, 5 mol%), phosphine oxide **2a** (81 mg, 0.4 mmol, 2.0 equiv), LPO (8 mg, 0.02 mmol, 0.1 equiv) was added. The Schlenk tube was capped with a rubber septum. After evacuated and backfilled with N<sub>2</sub> three times via branch, degassed acetonitrile (1.5 mL) and p-Tolyl isocyanate (76 µl, 0.6 mmol, 3.0 equiv) were added via a syringe. The reaction was irradiated with Blue LED lamps (45W) for 24 hours under 25 °C and monitored by TLC. After the reaction was completed, organic layers were concentrated under reduced pressure. Product **8** was detected by HRMS {calcd for C<sub>47</sub>H<sub>46</sub>NO<sub>6</sub>PH<sup>+</sup> [M+H]<sup>+</sup> 752.3136, found 752.3126.}.



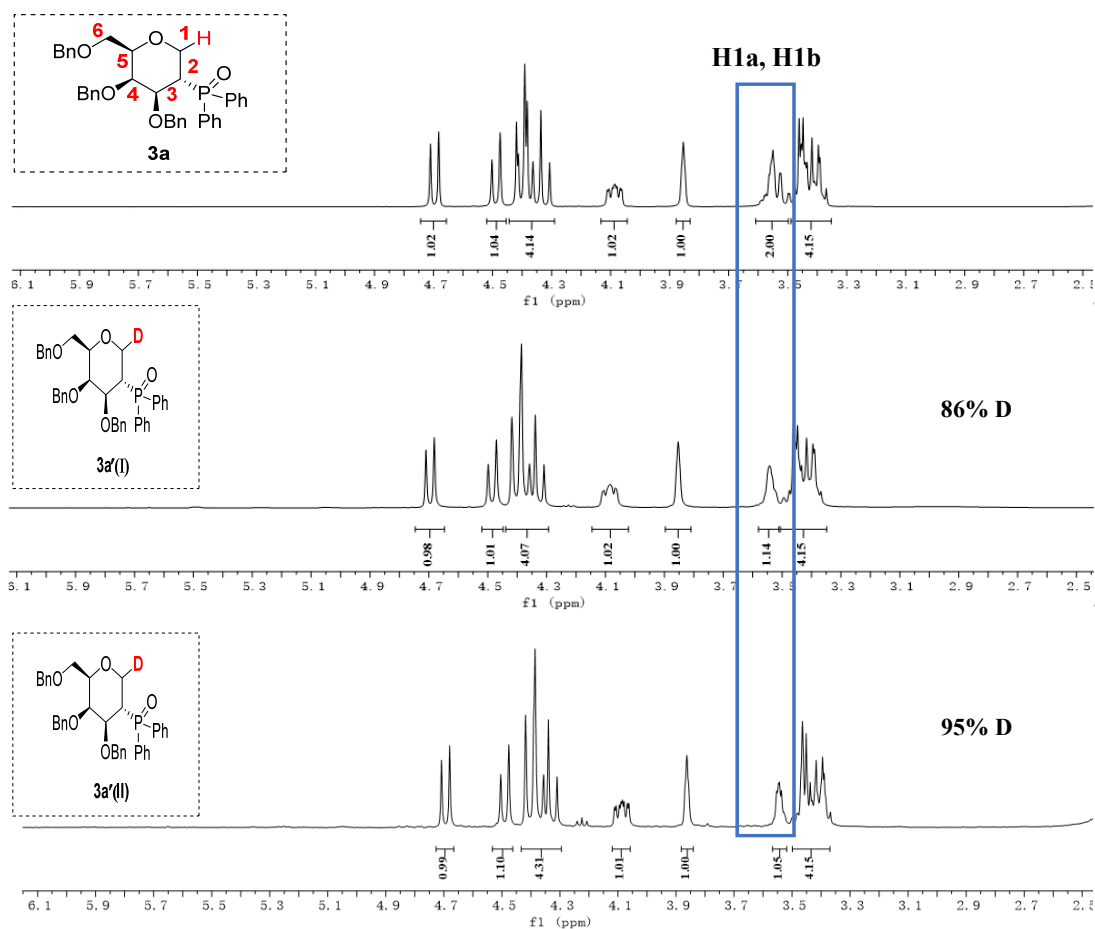

Compound 7: HRMS (ESI)  $m/z$  calcd for  $C_{47}H_{46}NO_6P$   $H^+$   $[M+H]^+$  752.3136, found 752.3126.

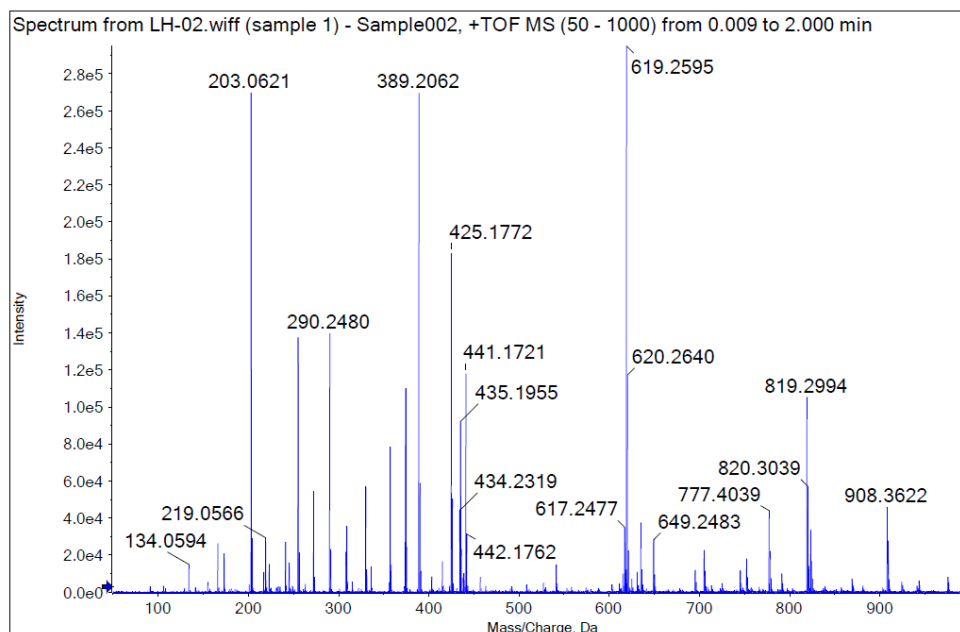



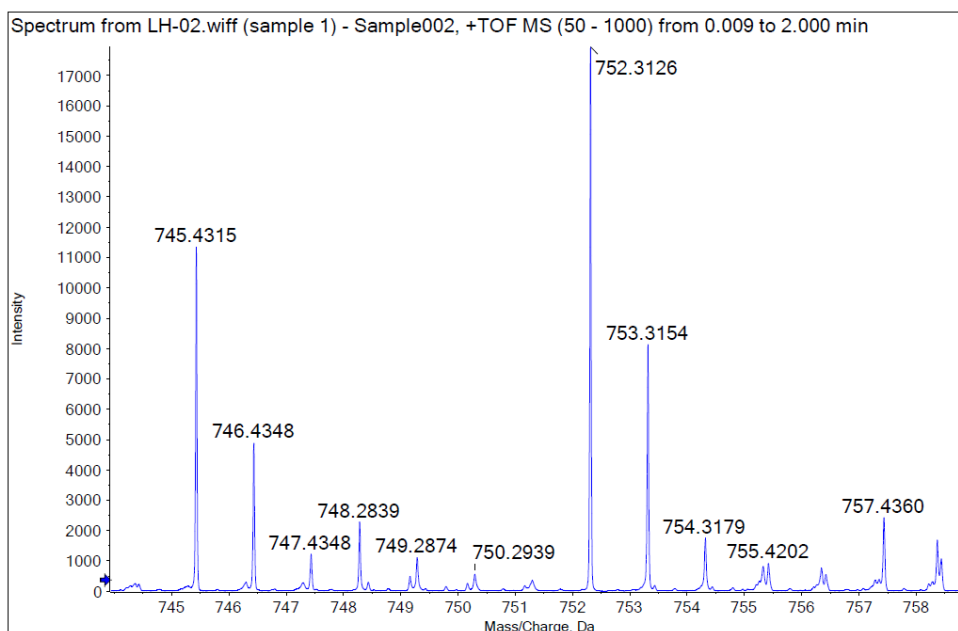

## 2.6 Reaction optimization using green solvents

Thirteen green solvents<sup>1</sup> were selected for the reaction optimization and *iso*-propanol was found to be a good alternative to CH<sub>3</sub>CN.

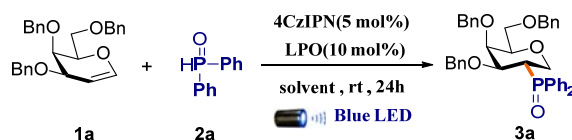

| Entry    | Solvent       | Yields (%) | Entry | Solvent           | Yields (%)  |
|----------|---------------|------------|-------|-------------------|-------------|
| 1        | n-BuOH        | 32%        | 8     | EA                | 77%         |
| 2        | BnOH          | Trac       | 9     | Ethyl Lactate     | No reaction |
| 3        | EtOH          | 52%        | 10    | Ethyl Propionate  | 71%         |
| <b>4</b> | <b>i-PrOH</b> | <b>82%</b> | 11    | Isobutyl acetate  | 69%         |
| 5        | t-BuOH        | 53%        | 12    | Isobutyl butyrate | 62%         |
| 6        | Acetone       | Trac       | 13    | Ethylene glycol   | No reaction |
| 7        | Cyclohexanone | 56%        |       |                   |             |

Conditions: **1a** (0.2mmol, 1 equiv), **2a** (0.4mmol, 2 equiv), photosensitizer (5 mol%), LPO (10 mol%), Blue LED, solvent (2 mL, degassed), N<sub>2</sub>, RT; <sup>a</sup> Yields determined by <sup>1</sup>H NMR analysis using 4-(trifluoromethyl)benzyl alcohol as an internal standard;

<sup>1</sup> D. Prat, A. Wells, J. Hayler, H. Sneddon, C. R. McElroy, S. Abou-Shehade and P. J. Dunn, *Green Chem.*, 2016, **18**, 288-296.



### 3. Computational Details

Calculations were performed using the Gaussian 09<sup>1</sup> software package. All of the geometries and energetics were fully optimized at the B3LYP<sup>2</sup>/6-311+G(d,p)<sup>3</sup> level of theory. Single-point energy calculations on the optimized geometries were then evaluated using Truhlar and co-workers' B3LYP and 6-311+G(d,p) basis set within the SMD model (acetonitrile)<sup>4</sup>. The thermal corrections evaluated from the unscaled vibrational frequencies at the B3LYP /6-311+G(d,p) level on the optimized geometries were then added to the B3LYP /6-311+G(d,p) electronic energies to obtain the free energies. The structural representations were generated with Gaussian View.

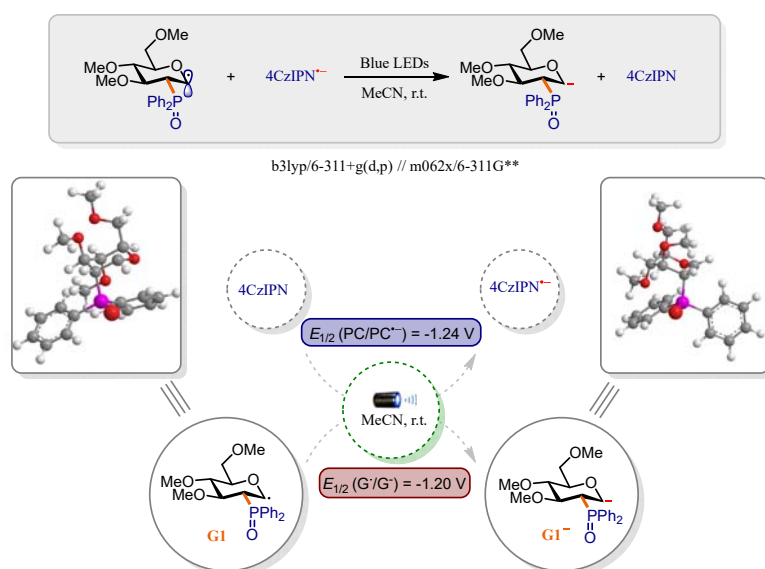

Under solvation conditions, the first electron transfer is described by the half-reaction where  $G^{\bullet-}$  is the sugar ring radical anion.

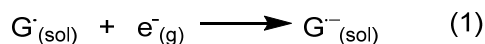

By electrochemical convention, the reaction is defined using a gas-phase electron<sup>5</sup>. The electrochemical half-cell potential for this reaction is the one electron reduction potential,  $E^0$ , which quantifies the tendency for the reaction to occur.  $E^0$  is related to the standard state free energy change for reaction 1,  $\Delta_{red}G^0$ , by the Nernst equation

$$E^0[V] = -\Delta_{red}G^0[eV]/F, \quad (2)$$

where  $F = 1$  eV/V is the Faraday constant. The <sup>0</sup> superscript indicates that the species are in their standard states, which in this work is a temperature of 298.15 K. All reduction potentials



in this work are reported for reduction in acetonitrile at 298.15 K. The reduction potential is measured and reported relative to a reference potential such as the normal hydrogen electrode (NHE), which is described by the oxidation half-reaction.

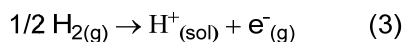

The oxidation potential for the NHE is  $E^0_{\text{NHE}} = -\Delta_{\text{NHE}}G^0/F$  [using eq. (2)], where  $\Delta_{\text{NHE}}G^0$  is the free energy change for reaction 3. The value of  $E^0_{\text{NHE}}$  is often quoted as  $-(4.6 \pm 0.10)$  V, as recommended by the S. Trasatti in 1986<sup>6</sup>. So the one-electron reduction potential of an G relative to the NHE is

$$E^0_{\text{H}} = E^0 + E^0_{\text{NHE}} = E^0 - (4.60 \pm 0.10) \text{ V} \quad (4)$$

That is,  $E^0_{\text{H}}$  is the electrochemical potential associated with the net reaction formed by summing reactions (1) and (3),

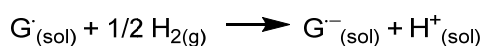

Equations (2) and (4), show that  $\Delta_{\text{red}}G^0$  is the only unknown required to calculate  $E^0_{\text{H}}$ .

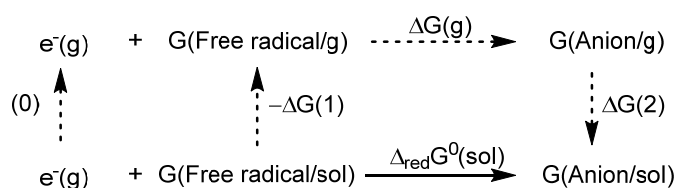

Figure 1. Thermodynamic cycle used to calculate  $\Delta_{\text{red}}G^0(\text{aq})$ . The solid arrow indicates the direct calculation path, whereas the dashed arrows indicate the indirect calculation path. The two paths are thermodynamically equivalent; that is, the net free energy change along both paths is equal to  $\Delta_{\text{red}}G^0(\text{aq})$ .

According to the Figure 1, we can get the following relationship, then  $E^0_{\text{H}}$  and  $\Delta_{\text{red}}G^0$  can also be predicted accurately.

$$\Delta_{\text{red}}G^0(\text{sol}) = -\Delta G(1) + \Delta G(g) + \Delta G(2) \quad (a)$$

$$-\Delta G(1) = G(\text{Free radical/sol}) - G(\text{Free radical/g}) \quad (b)$$

$$\Delta G(2) = G(\text{Anion/sol}) - G(\text{Anion/g}) \quad (c)$$

|                    | G(0)/a. u. |                              |          |  |
|--------------------|------------|------------------------------|----------|--|
| G(Free radical/g)  | -1533.25   | ΔG(1)/a. u.                  | 0.31917  |  |
| G(Free radical/aq) | -1532.93   | ΔG(2)/a. u.                  | 0.397449 |  |
| G(Anion/g)         | -1533.29   | ΔG(g)/a. u.                  | -0.03425 |  |
| G(Anion/aq)        | -1532.89   | Δ <sub>red</sub> G(aq)/a. u. | 0.044031 |  |
|                    |            | Δ <sub>red</sub> E(aq)/V     | -1.19795 |  |



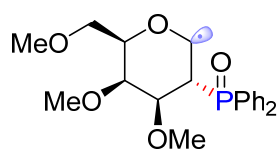

E(UM062X) = -1532.93209553 a.u.

|                                              |                             |
|----------------------------------------------|-----------------------------|
| Zero-point correction=                       | 0.433887 (Hartree/Particle) |
| Thermal correction to Energy=                | 0.461455                    |
| Thermal correction to Enthalpy=              | 0.462400                    |
| Thermal correction to Gibbs Free Energy=     | 0.371174                    |
| Sum of electronic and zero-point Energies=   | -1533.188553                |
| Sum of electronic and thermal Energies=      | -1533.160984                |
| Sum of electronic and thermal Enthalpies=    | -1533.160040                |
| Sum of electronic and thermal Free Energies= | -1533.251266                |

|   |             |             |             |
|---|-------------|-------------|-------------|
| C | -2.25333877 | -5.17935394 | 2.26888804  |
| C | -0.70825467 | -5.22322272 | 2.20578599  |
| C | -0.15632367 | -3.81214472 | 2.20578599  |
| C | -0.70598667 | -3.00760772 | 3.36644699  |
| C | -2.25439208 | -3.09953276 | 3.36185871  |
| H | -2.62602677 | -4.74632494 | 1.30350304  |
| H | -0.33345167 | -3.44245272 | 4.33105799  |
| H | -0.42494167 | -3.30651172 | 1.24123999  |
| O | -2.71065318 | -4.36885046 | 3.30565923  |
| O | 1.27077752  | -3.85551021 | 2.28579610  |
| C | -2.76935589 | -6.62770301 | 2.35613080  |
| H | -2.06571984 | -7.22502492 | 2.89742817  |
| H | -3.71201285 | -6.64060492 | 2.86222505  |
| O | -2.92907547 | -7.15706580 | 1.03735686  |
| C | -1.64253437 | -7.38961521 | 0.45801865  |
| H | -0.94025470 | -7.62291746 | 1.23085325  |
| H | -1.70304295 | -8.20851483 | -0.22801497 |
| H | -1.32164883 | -6.51141883 | -0.06227318 |
| O | -0.22951042 | -5.92465103 | 1.05526339  |
| H | -0.35289834 | -5.74367639 | 3.07051130  |
| C | 1.20048788  | -5.92350363 | 1.05714542  |
| C | 1.83227967  | -3.22882905 | 1.12955821  |
| H | 1.55850078  | -5.94731887 | 0.04909800  |
| H | 1.55580747  | -5.03776505 | 1.54099990  |
| H | 1.55715412  | -6.78456843 | 1.58274660  |
| H | 2.77581133  | -3.67944460 | 0.90241589  |
| H | 1.16884465  | -3.35251413 | 0.29922335  |
| H | 1.97232799  | -2.18561315 | 1.32187836  |



|   |             |             |             |
|---|-------------|-------------|-------------|
| P | -0.09544591 | -1.29602729 | 3.26578700  |
| O | 1.27395970  | -1.28883671 | 2.65367870  |
| C | -1.22540444 | -0.30841820 | 2.23611618  |
| C | -0.88341954 | -0.00629977 | 0.91769204  |
| C | -2.43331157 | 0.14634743  | 2.76497978  |
| C | -1.74889988 | 0.75099045  | 0.12859316  |
| H | 0.06929377  | -0.36432544 | 0.50128267  |
| C | -3.29961620 | 0.90304568  | 1.97546478  |
| H | -2.70308734 | -0.09182795 | 3.80402865  |
| C | -2.95756429 | 1.20553181  | 0.65749679  |
| H | -1.47912642 | 0.98969445  | -0.91041559 |
| H | -4.25211763 | 1.26112506  | 2.39259116  |
| H | -3.63983054 | 1.80256250  | 0.03511148  |
| C | -0.01649212 | -0.58078053 | 4.93748924  |
| C | 1.16082956  | -0.67233918 | 5.68045770  |
| C | -1.13290712 | 0.05899726  | 5.47586647  |
| C | 1.22141993  | -0.12480715 | 6.96176922  |
| H | 2.04057276  | -1.17746600 | 5.25602799  |
| C | -1.07215272 | 0.60761374  | 6.75717000  |
| H | -2.06084452 | 0.13140601  | 4.89035968  |
| C | 0.10470316  | 0.51569936  | 7.50020365  |
| H | 2.14916525  | -0.19748601 | 7.54768979  |
| H | -1.95242522 | 1.11235247  | 7.18123764  |
| H | 0.15273219  | 0.94738419  | 8.51046983  |
| H | -2.62822453 | -2.63950183 | 4.25265658  |

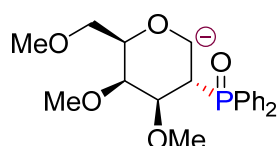

E(RM062X) = -1532.88806500 a.u.

|                                              |                             |
|----------------------------------------------|-----------------------------|
| Zero-point correction=                       | 0.431109 (Hartree/Particle) |
| Thermal correction to Energy=                | 0.458271                    |
| Thermal correction to Enthalpy=              | 0.459215                    |
| Thermal correction to Gibbs Free Energy=     | 0.371600                    |
| Sum of electronic and zero-point Energies=   | -1533.226005                |
| Sum of electronic and thermal Energies=      | -1533.198844                |
| Sum of electronic and thermal Enthalpies=    | -1533.197899                |
| Sum of electronic and thermal Free Energies= | -1533.285514                |

|   |             |             |            |
|---|-------------|-------------|------------|
| C | -2.25333877 | -5.17935394 | 2.26888804 |
| C | -0.70825467 | -5.22322272 | 2.20578599 |
| C | -0.15632367 | -3.81214472 | 2.20578599 |
| C | -0.70598667 | -3.00760772 | 3.36644699 |



|   |             |             |             |
|---|-------------|-------------|-------------|
| C | -2.25439208 | -3.09953276 | 3.36185871  |
| H | -2.62602677 | -4.74632494 | 1.30350304  |
| H | -0.33345167 | -3.44245272 | 4.33105799  |
| H | -0.42494167 | -3.30651172 | 1.24123999  |
| O | -2.71065318 | -4.36885046 | 3.30565923  |
| O | 1.27077752  | -3.85551021 | 2.28579610  |
| C | -2.76935589 | -6.62770301 | 2.35613080  |
| H | -2.06571984 | -7.22502492 | 2.89742817  |
| H | -3.71201285 | -6.64060492 | 2.86222505  |
| O | -2.92907547 | -7.15706580 | 1.03735686  |
| C | -1.64253437 | -7.38961521 | 0.45801865  |
| H | -0.94025470 | -7.62291746 | 1.23085325  |
| H | -1.70304295 | -8.20851483 | -0.22801497 |
| H | -1.32164883 | -6.51141883 | -0.06227318 |
| O | -0.22951042 | -5.92465103 | 1.05526339  |
| H | -0.35289834 | -5.74367639 | 3.07051130  |
| C | 1.20048788  | -5.92350363 | 1.05714542  |
| C | 1.83227967  | -3.22882905 | 1.12955821  |
| H | 1.55850078  | -5.94731887 | 0.04909800  |
| H | 1.55580747  | -5.03776505 | 1.54099990  |
| H | 1.55715412  | -6.78456843 | 1.58274660  |
| H | 2.77581133  | -3.67944460 | 0.90241589  |
| H | 1.16884465  | -3.35251413 | 0.29922335  |
| H | 1.97232799  | -2.18561315 | 1.32187836  |
| P | -0.09544591 | -1.29602729 | 3.26578700  |
| O | 0.67882644  | -0.96750326 | 4.50779114  |
| C | 0.98651718  | -1.12234067 | 1.81265630  |
| C | 2.37234502  | -1.10561206 | 1.97288352  |
| C | 0.43031472  | -1.00606474 | 0.53881688  |
| C | 3.20169039  | -0.97195546 | 0.85953546  |
| H | 2.81051431  | -1.19652964 | 2.97736521  |
| C | 1.25979775  | -0.87335074 | -0.57507485 |
| H | -0.66190913 | -1.01940953 | 0.41233366  |
| C | 2.64529026  | -0.85614167 | -0.41491447 |
| H | 4.29400866  | -0.95813096 | 0.98581368  |
| H | 0.82098375  | -0.78210456 | -1.57936099 |
| H | 3.29940143  | -0.75082733 | -1.29260679 |
| C | -1.50631870 | -0.15674266 | 3.11129267  |
| C | -2.08140521 | 0.40030370  | 4.25385396  |
| C | -2.01260434 | 0.15959398  | 1.85067611  |
| C | -3.16296067 | 1.27295254  | 4.13577128  |
| H | -1.68251782 | 0.15010835  | 5.24760087  |
| C | -3.09385667 | 1.03326239  | 1.73232585  |
| H | -1.55935312 | -0.27921627 | 0.95004415  |



|   |             |             |            |
|---|-------------|-------------|------------|
| C | -3.66915851 | 1.58984277  | 2.87459687 |
| H | -3.61670249 | 1.71157127  | 5.03634248 |
| H | -3.49256678 | 1.28281839  | 0.73823014 |
| H | -4.52189574 | 2.27796543  | 2.78173808 |
| H | -2.65494298 | -2.13365615 | 3.13483150 |



## 4. References

1. Gaussian 09, Revision E.01, M. J. Frisch, G. W. Trucks, H. B. Schlegel, G. E. Scuseria, M. A. Robb, J. R. Cheeseman, G. Scalmani, V. Barone, B. Mennucci, G. A. Petersson, H. Nakatsuji, M. Caricato, X. Li, H. P. Hratchian, A. F. Izmaylov, J. Bloino, G. Zheng, J. L. Sonnenberg, M. Hada, M. Ehara, K. Toyota, R. Fukuda, J. Hasegawa, M. Ishida, T. Nakajima, Y. Honda, O. Kitao, H. Nakai, T. Vreven, J. A. Montgomery, Jr., J. E. Peralta, F. Ogliaro, M. Bearpark, J. J. Heyd, E. Brothers, K. N. Kudin, V. N. Staroverov, T. Keith, R. Kobayashi, J. Normand, K. Raghavachari, A. Rendell, J. C. Burant, S. S. Iyengar, J. Tomasi, M. Cossi, N. Rega, J. M. Millam, M. Klene, J. E. Knox, J. B. Cross, V. Bakken, C. Adamo, J. Jaramillo, R. Gomperts, R. E. Stratmann, O. Yazyev, A. J. Austin, R. Cammi, C. Pomelli, J. W. Ochterski, R. L. Martin, K. Morokuma, V. G. Zakrzewski, G. A. Voth, P. Salvador, J. J. Dannenberg, S. Dapprich, A. D. Daniels, O. Farkas, J. B. Foresman, J. V. Ortiz, J. Cioslowski, and D. J. Fox, Gaussian, Inc., Wallingford CT, 2013.
2. (a) Bachman, J. E.; Curtiss, L. A.; Assary, R. S., Investigation of the redox chemistry of anthraquinone derivatives using density functional theory. *J Phys Chem A*, **2014**, *118*, 8852-60.  
(b) Phillips, K. L.; Sandler, S. I.; Chiu, P. C., A method to calculate the one-electron reduction potentials for nitroaromatic compounds based on gas-phase quantum mechanics. *J Comput Chem*, **2011**, *32*, 226-39.
3. Hehre, W. J.; Radom, L.; Schleyer, P. v. R.; Pople, J. A. Ab Initio Molecular Orbital Theory; John Wiley & Sons: New York, 1986 and references cited therein.
4. Truhlar, D. G., Universal Solvation Model Based on Solute Electron Density and on a Continuum Model of the Solvent Defined by the Bulk Dielectric Constant and Atomic Surface Tensions. *J. Phys. Chem. B*, **2009**, *113*, 6378–6396.
5. Winget, P.; Cramer, C. J.; Truhlar, D. G. *Theor. Chem. Acc.* **2004**, *112*, 217–227.
6. S. Trasatti.; The absolute electrode potential : an explanatory note (Recommendations 1986). *Pure & Appl Chem.*, Vol. 58, No.7, pp. 955—966, 1986.



## 5. Copies of NMR Spectra

### $^1\text{H}$ NMR ( $\text{CDCl}_3$ , 400 MHz) of **3a**

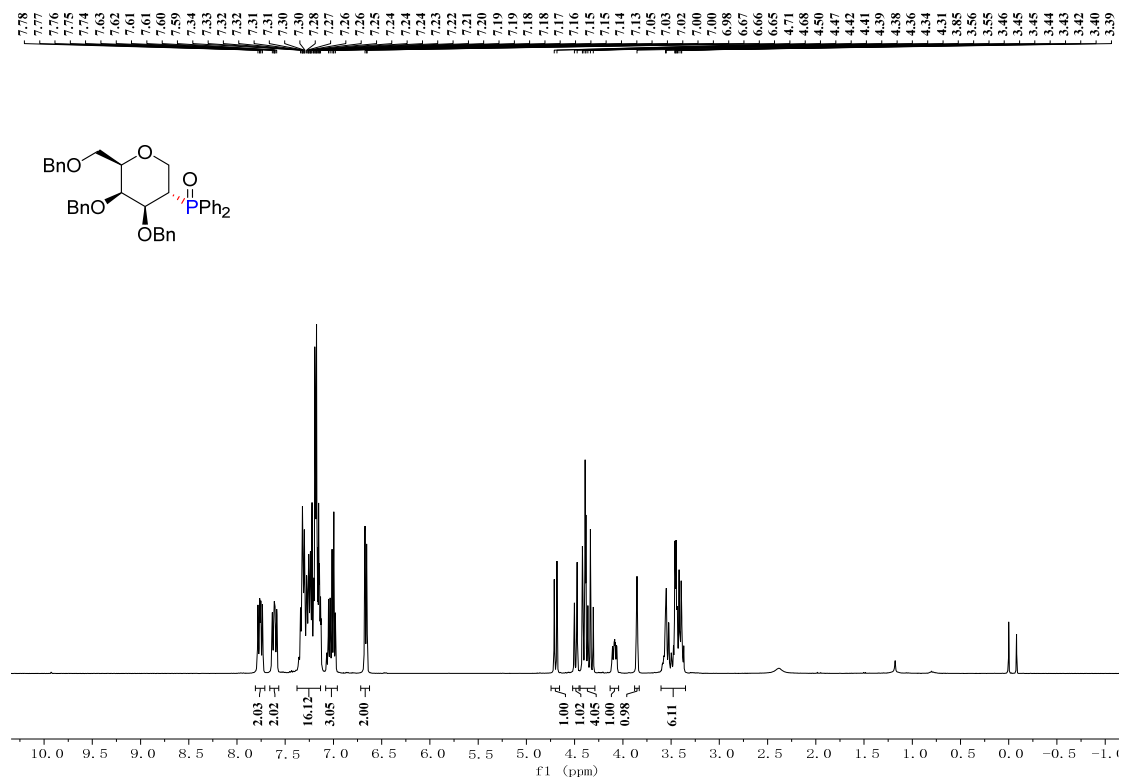



**$^{31}\text{P}$  NMR ( $\text{CDCl}_3$ , 162 MHz) of **3a****

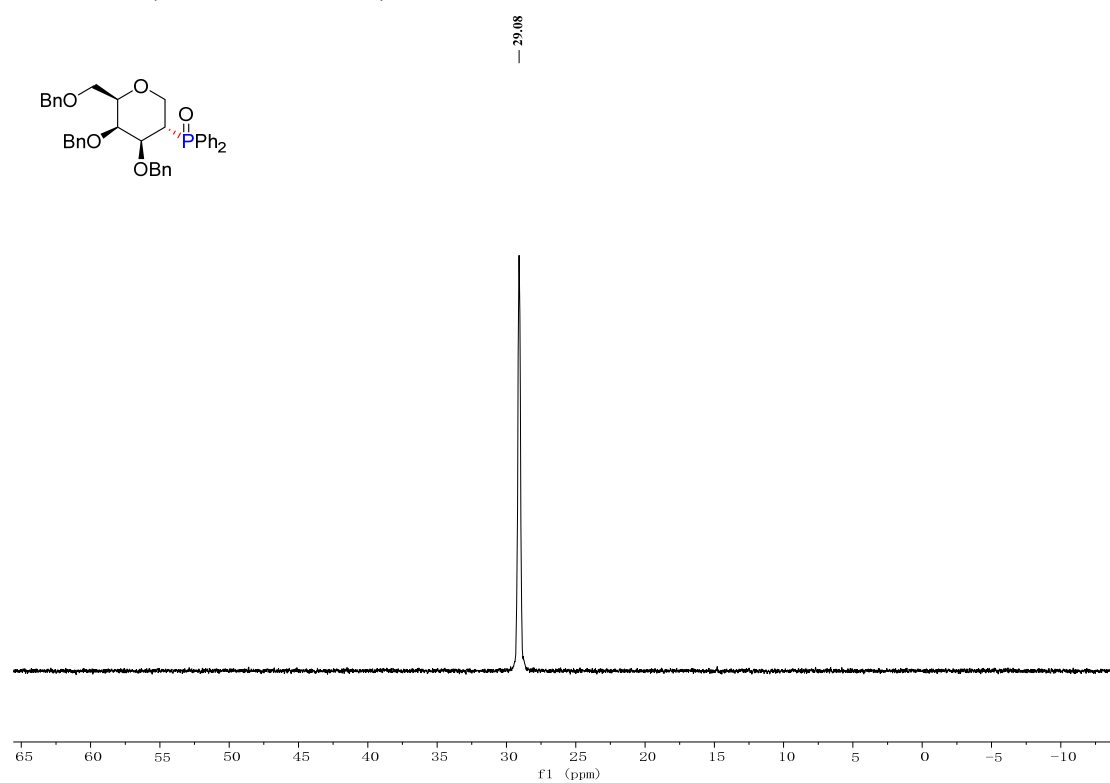

**$^1\text{H}$  NMR ( $\text{CDCl}_3$ , 400 MHz) of **3b****

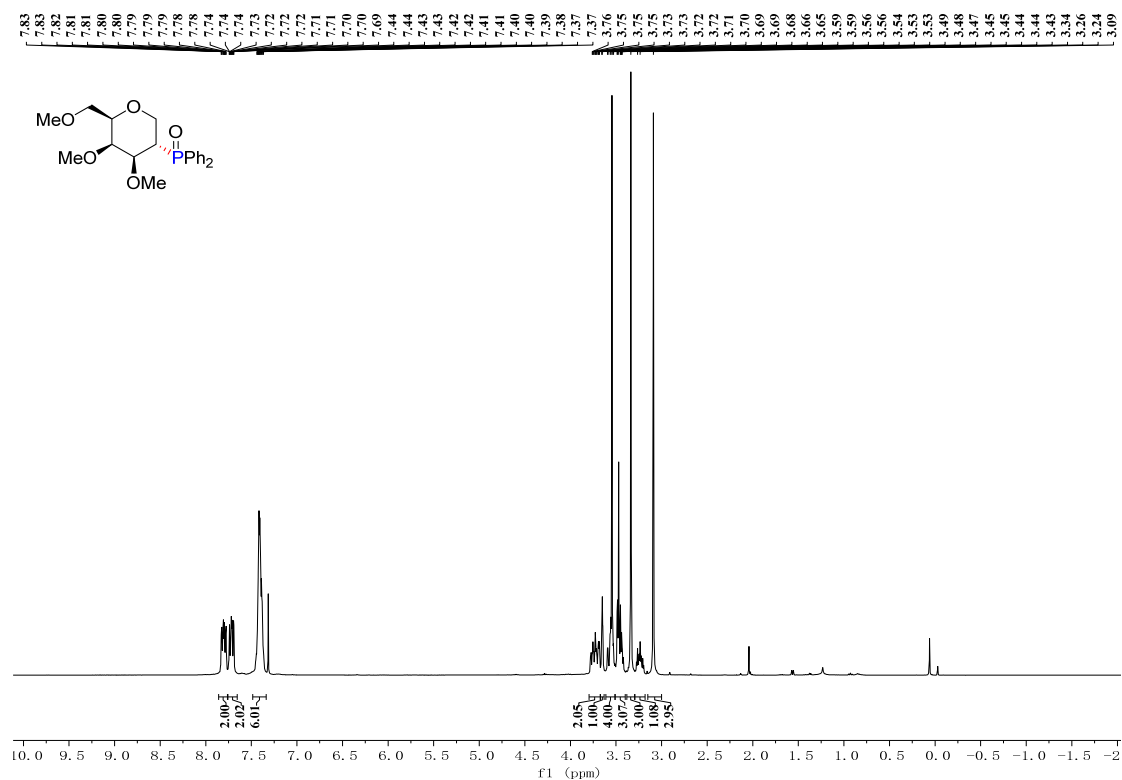



**$^{13}\text{C}$  NMR (CDCl<sub>3</sub>, 100 MHz) of **3b****

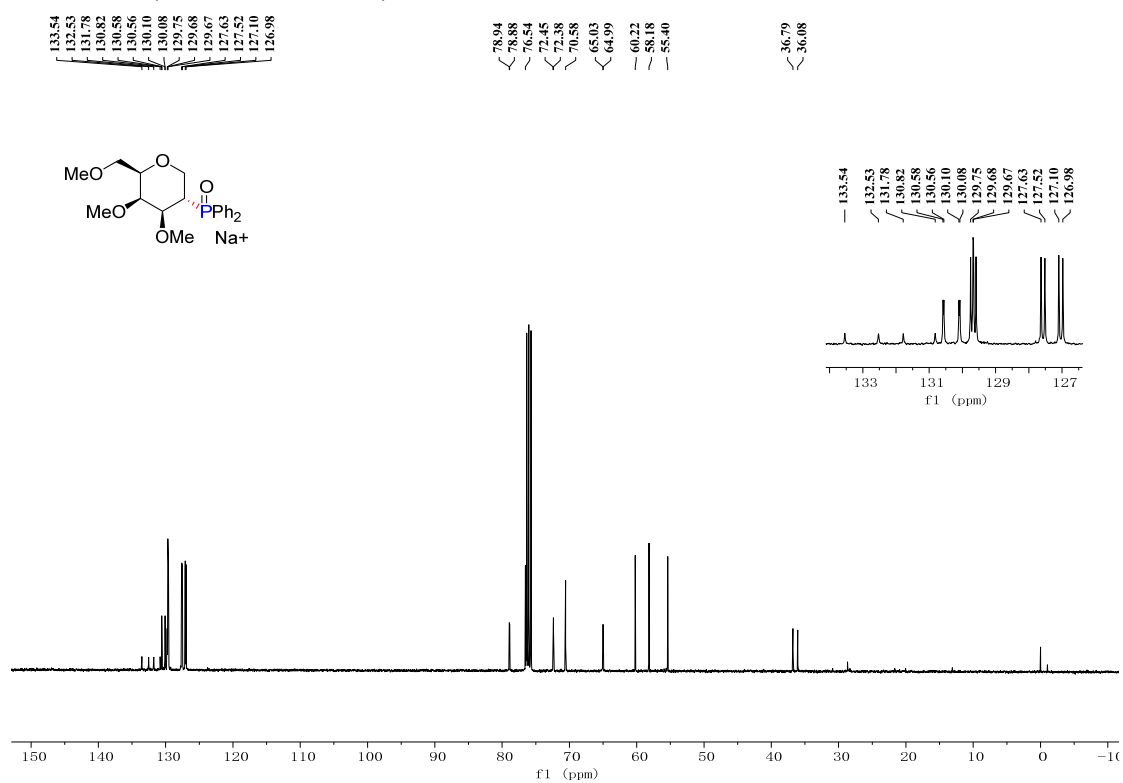

**$^{31}\text{P}$  NMR (CDCl<sub>3</sub>, 162 MHz) of **3b****

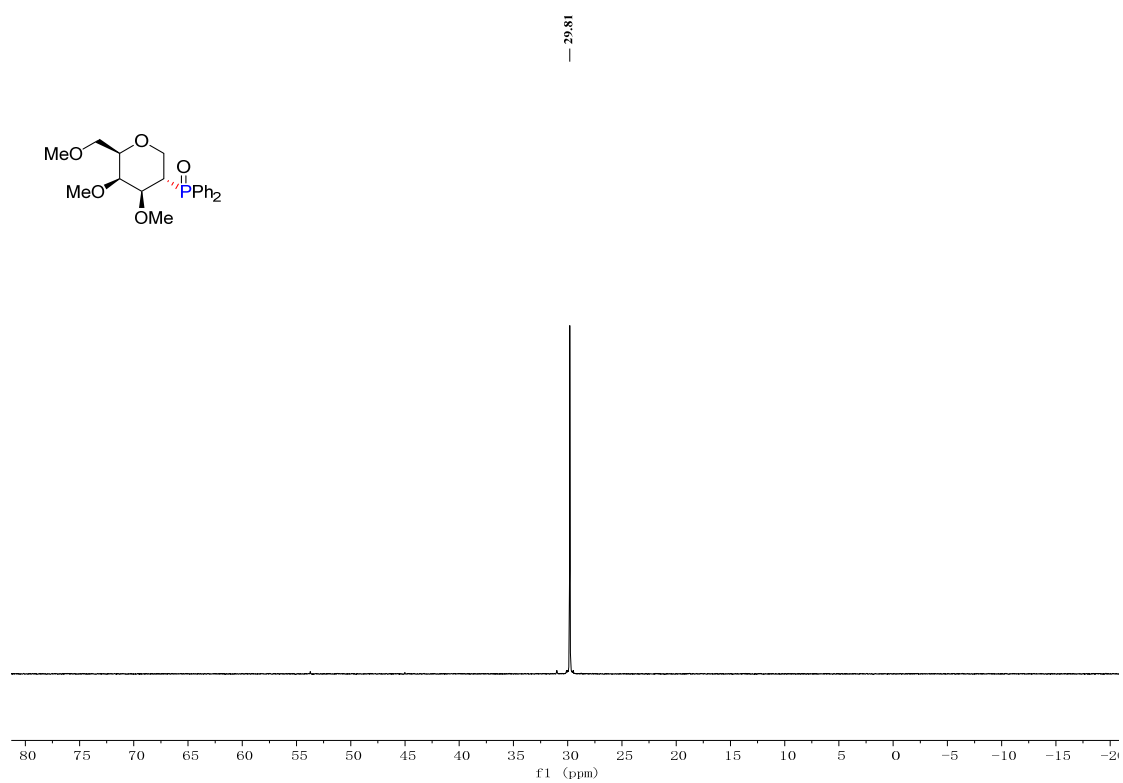



**$^1\text{H}$  NMR ( $\text{CDCl}_3$ , 400 MHz) of **3c****

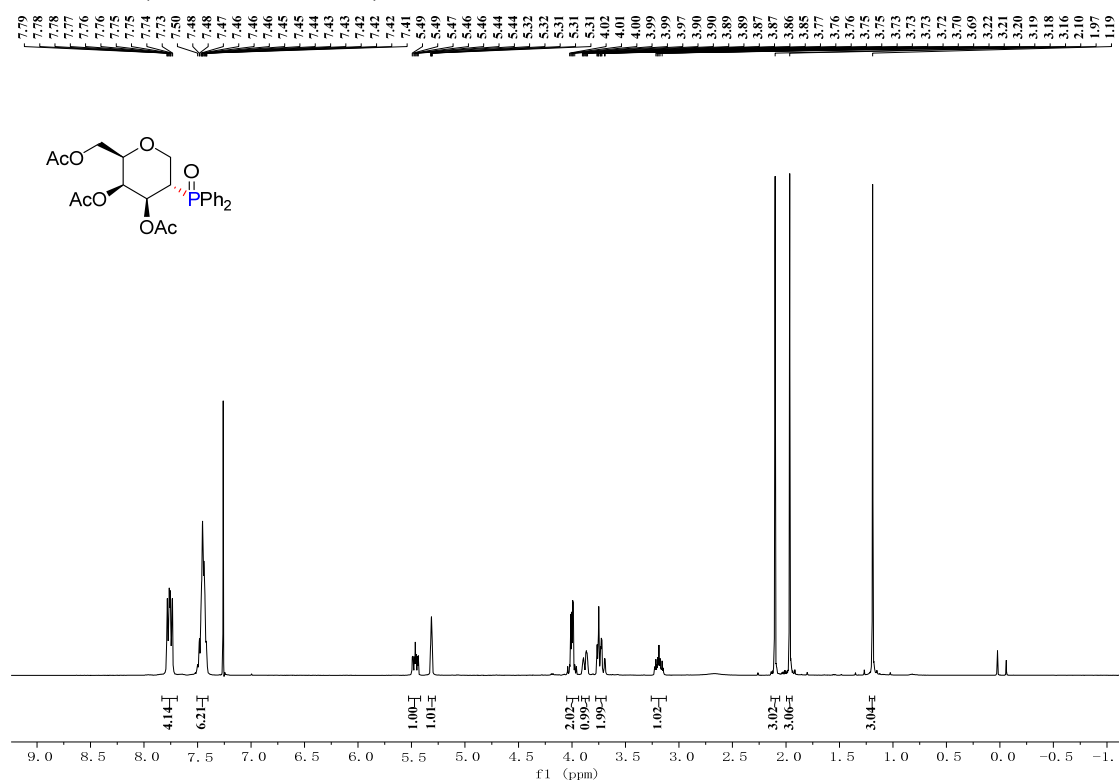

**$^{13}\text{C}$  NMR ( $\text{CDCl}_3$ , 100 MHz) of **3c****

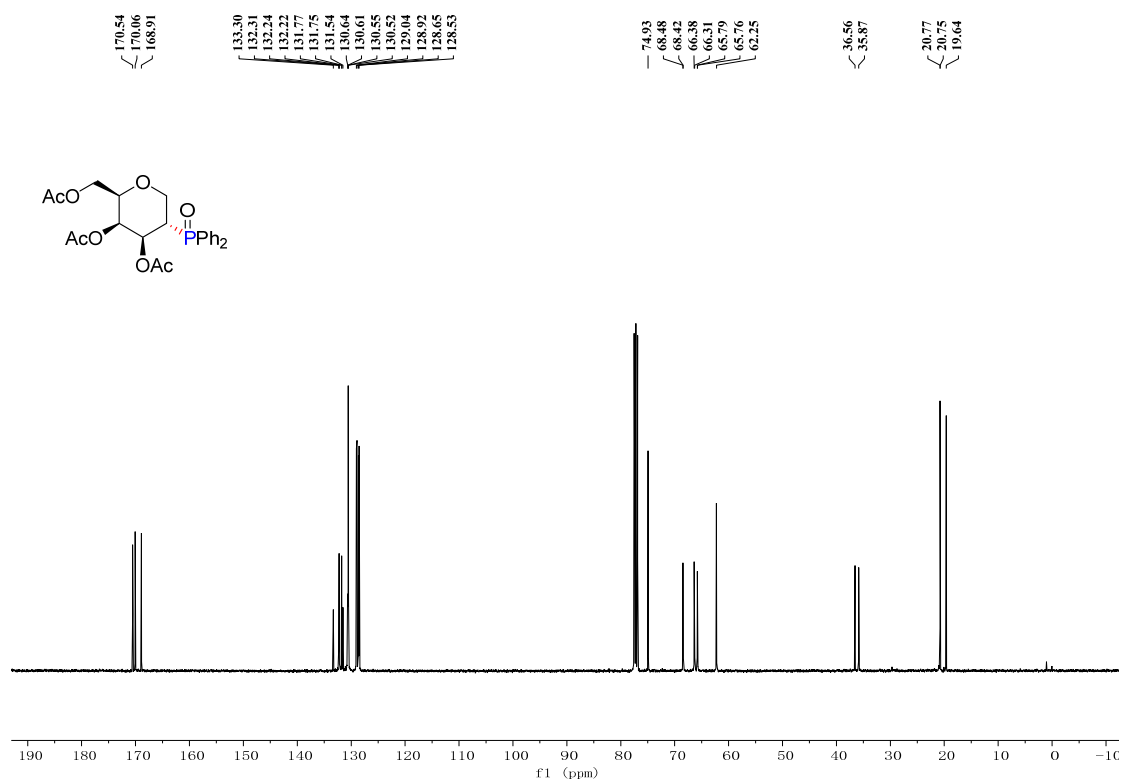



**$^{31}\text{P}$  NMR ( $\text{CDCl}_3$ , 162 MHz) of **3c****

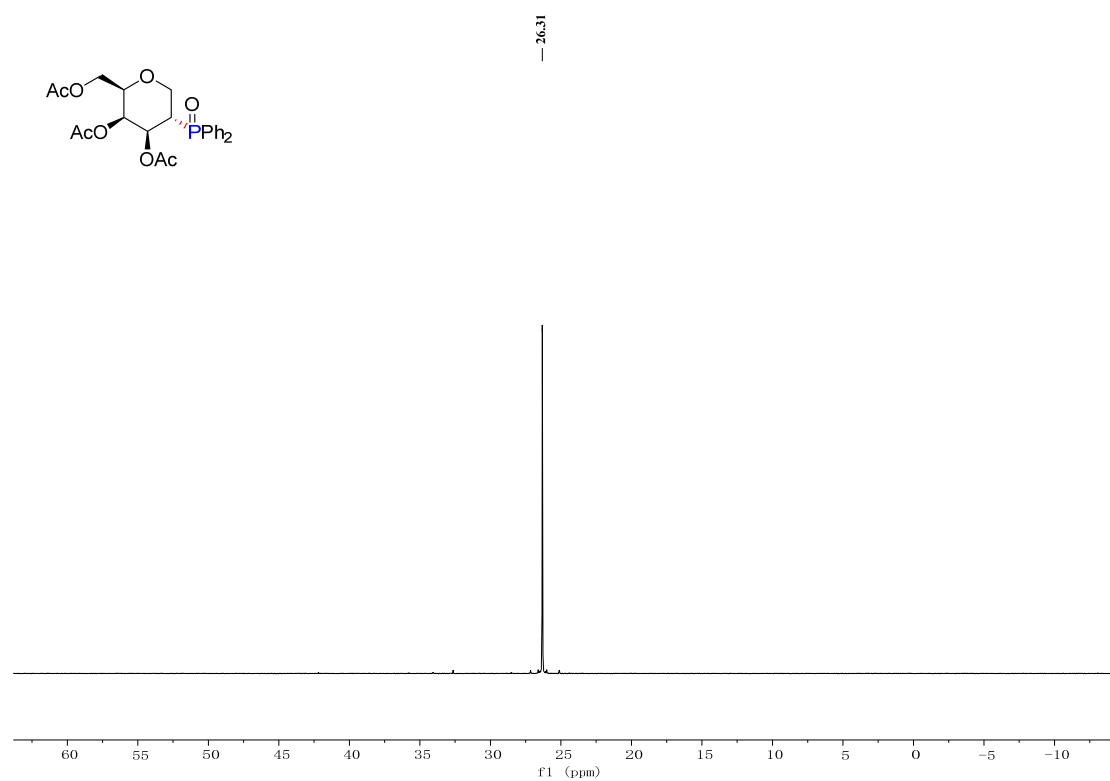

**$^1\text{H}$  NMR ( $\text{CDCl}_3$ , 400 MHz) of **3d****

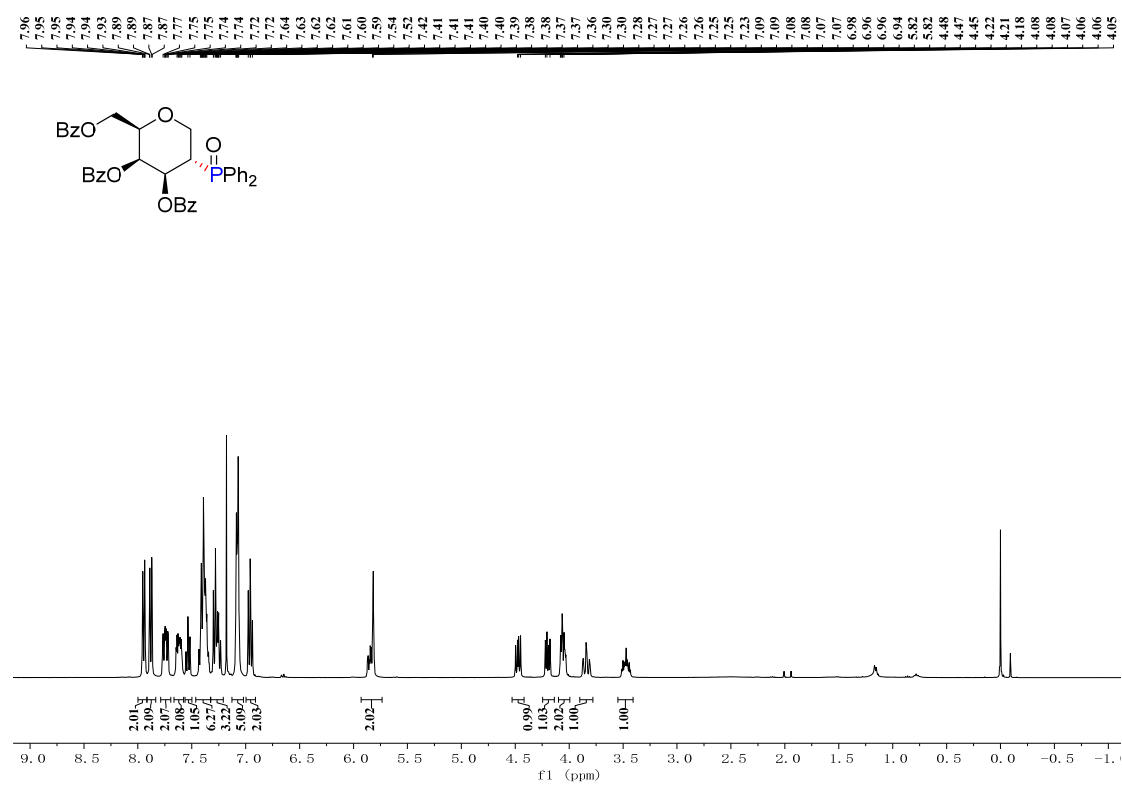



**$^{13}\text{C}$  NMR (CDCl<sub>3</sub>, 100 MHz) of **3d****

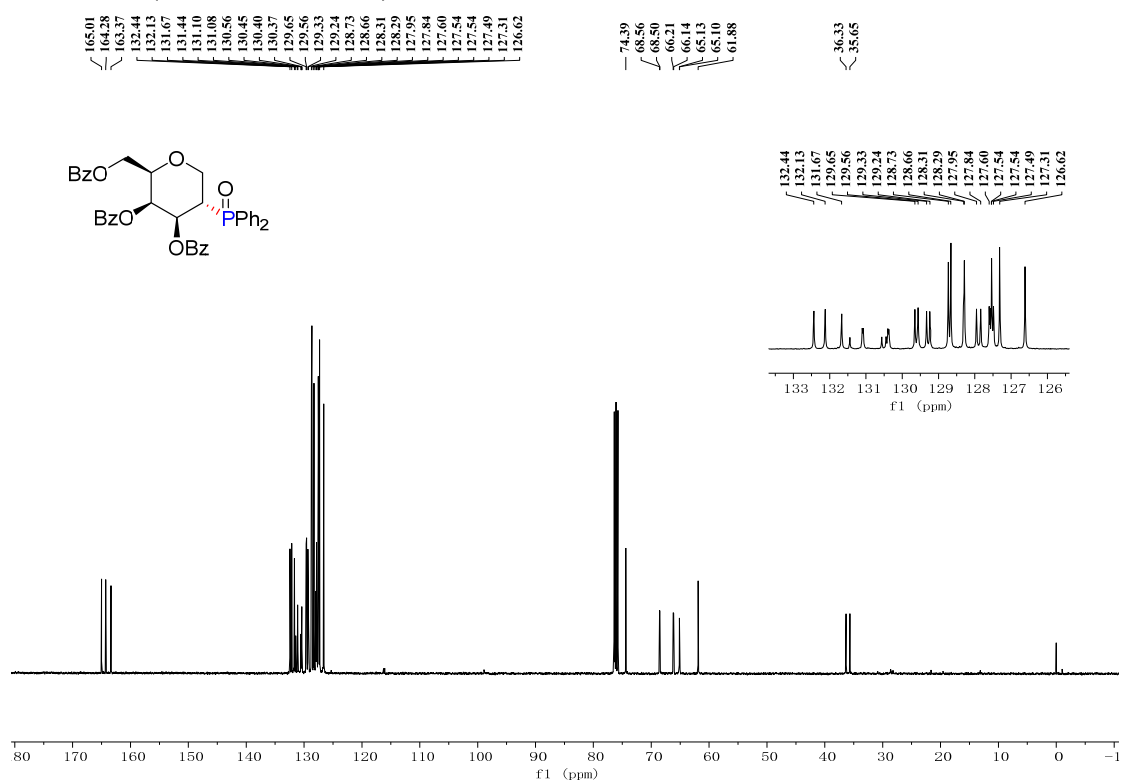

**$^{31}\text{P}$  NMR (CDCl<sub>3</sub>, 162 MHz) of **3d****

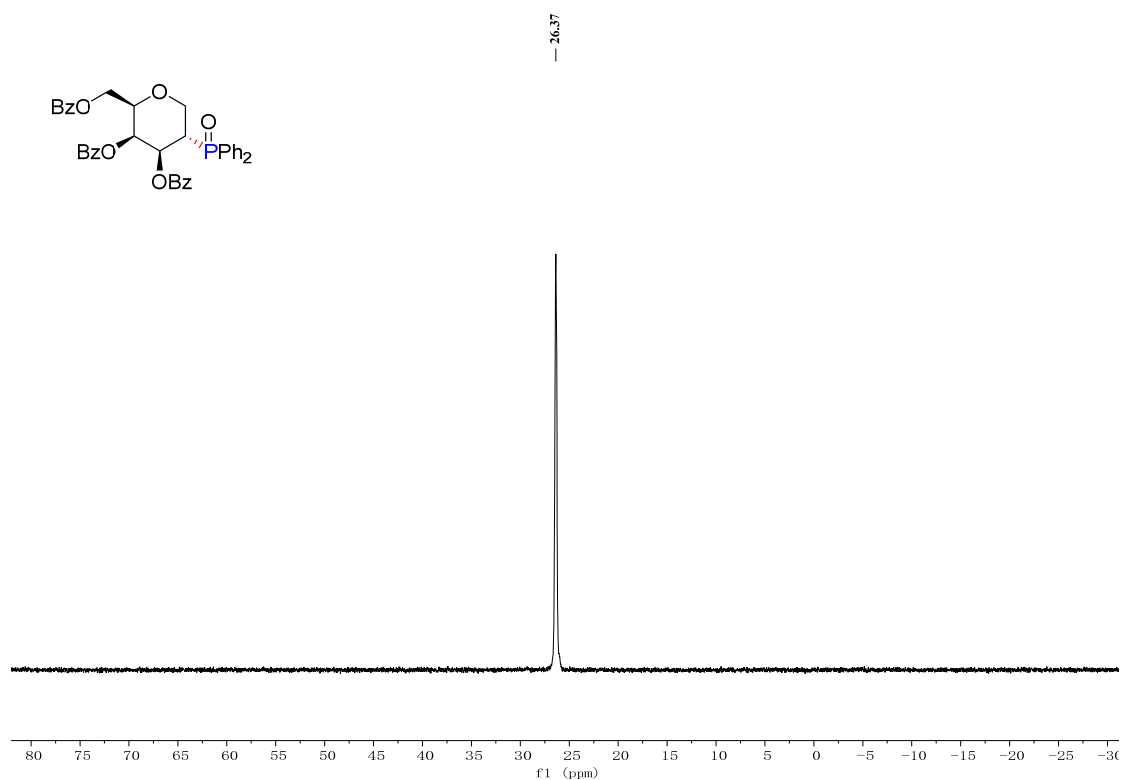



Chemical structure of compound 10 is shown as an inset. The structure is a six-membered ring with a PivO group at C1, a BnO group at C2, and a PivO group at C3. The spectrum shows peaks from 0.7 to 7.9 ppm. Integration values are provided below the baseline: 2.06, 2.09, 11.28, 1.00, 0.98, 1.01, 0.99, 1.03, 1.04, 4.02, 9.22, and 9.14. A list of chemical shifts (delta) is provided at the top of the spectrum, ranging from 7.86 to 0.72 ppm.

Chemical structure of the compound is shown above the spectrum. The structure is a substituted tetrahydropyran with a PivO group, a BnO group, and a PPh<sub>2</sub> group.

Chemical shifts (ppm) are listed above the spectrum:

- 177.05
- 176.40
- 136.50
- 135.02
- 132.02
- 131.18
- 130.83
- 130.80
- 130.77
- 130.20
- 129.68
- 129.66
- 129.59
- 129.57
- 127.81
- 127.69
- 127.51
- 127.09
- 126.94
- 75.38
- 74.22
- 72.66
- 72.59
- 61.85
- 37.68
- 37.49
- 34.24
- 33.54
- 26.10
- 25.61



— 27.54

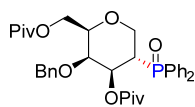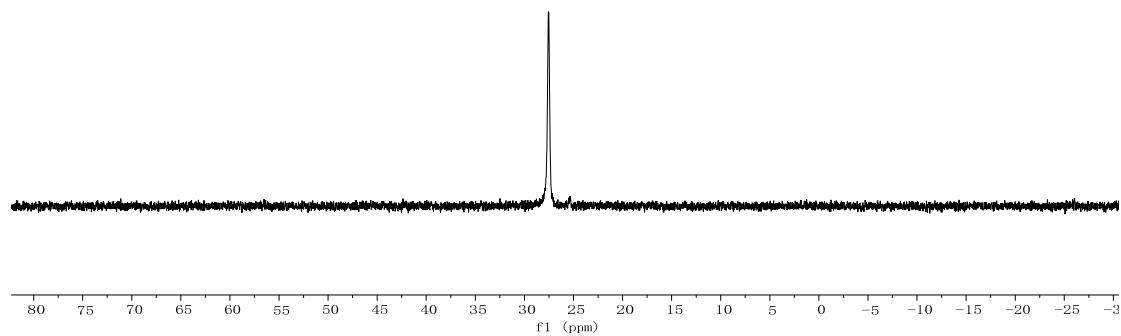

Chemical structure of compound 10: COc1ccc(cc1)C2OC(COP(=O)(c3ccccc3)c4ccccc4)C2

<sup>1</sup>H NMR spectrum (CDCl<sub>3</sub>) of compound 10. The x-axis represents the chemical shift in ppm, ranging from -2 to 10.0. The spectrum shows several peaks corresponding to the structure, with integration values indicated below the baseline.

Integration values (from left to right): 4.15, 8.24, 2.04, 2.01, 1.00, 1.03, 1.03, 1.03, 1.04, 3.11.



**$^{13}\text{C}$  NMR (CDCl<sub>3</sub>, 100 MHz) of **3f****

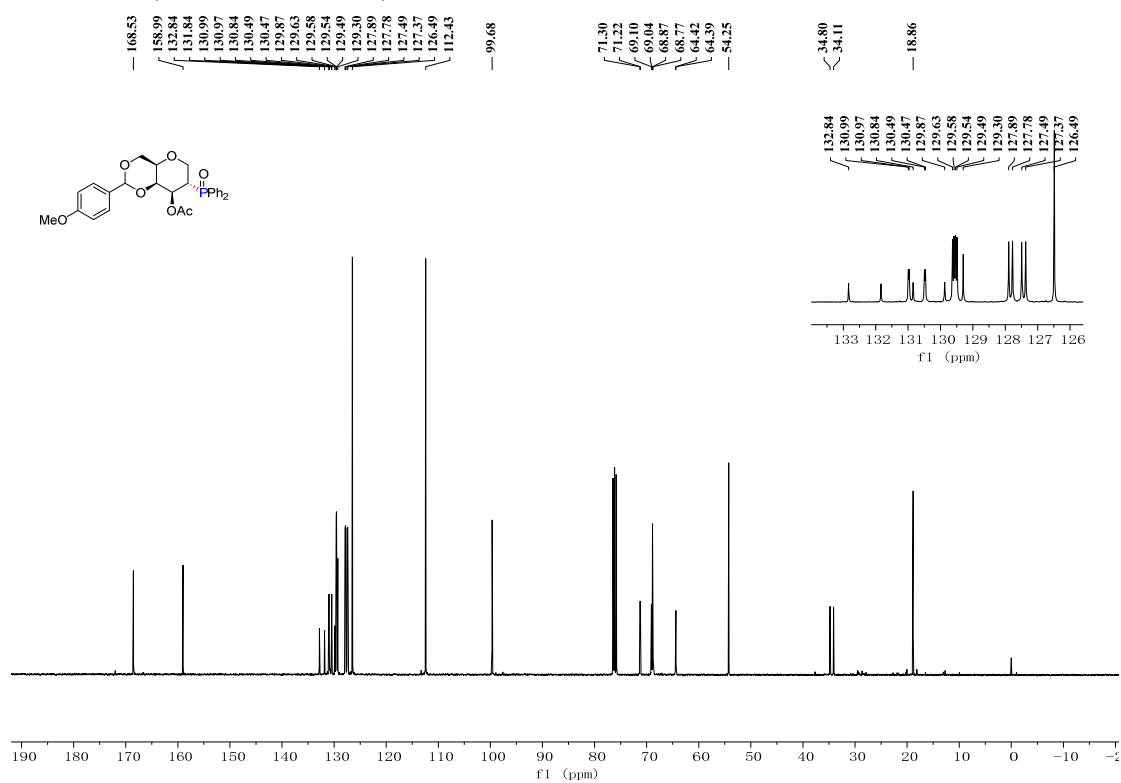

**$^{31}\text{P}$  NMR (CDCl<sub>3</sub>, 162 MHz) of **3f****

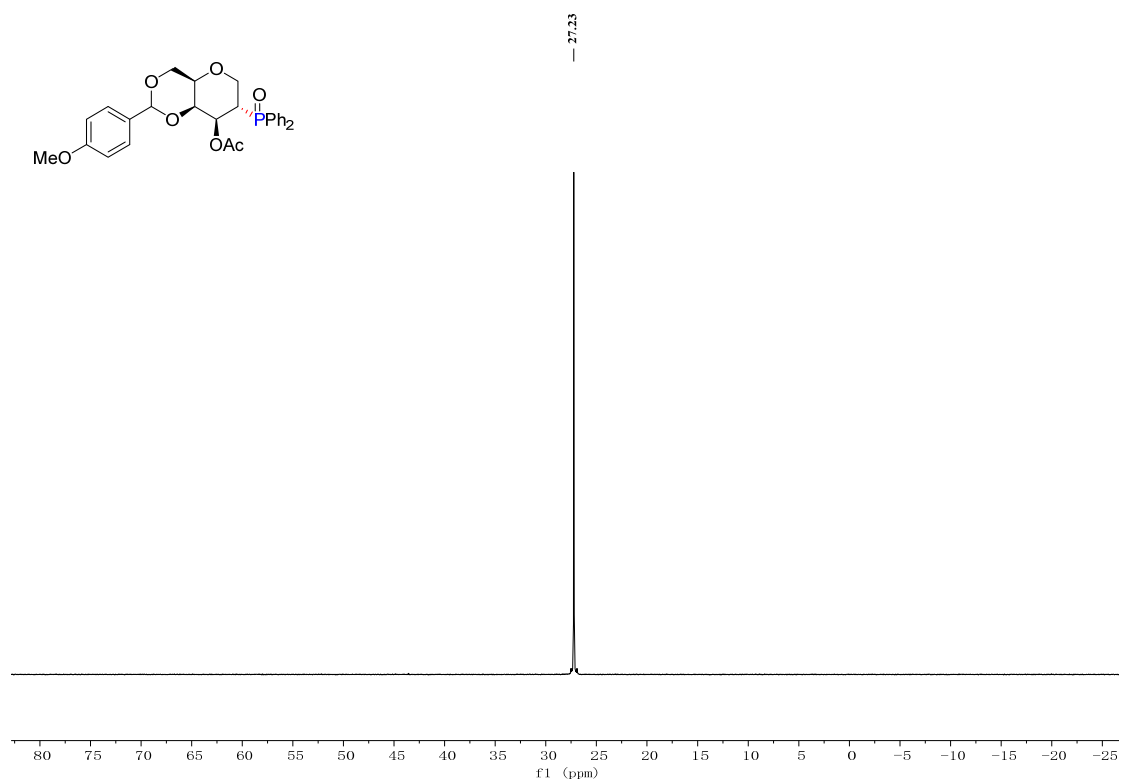



**<sup>1</sup>H NMR (CDCl<sub>3</sub>, 400 MHz) of **3g****

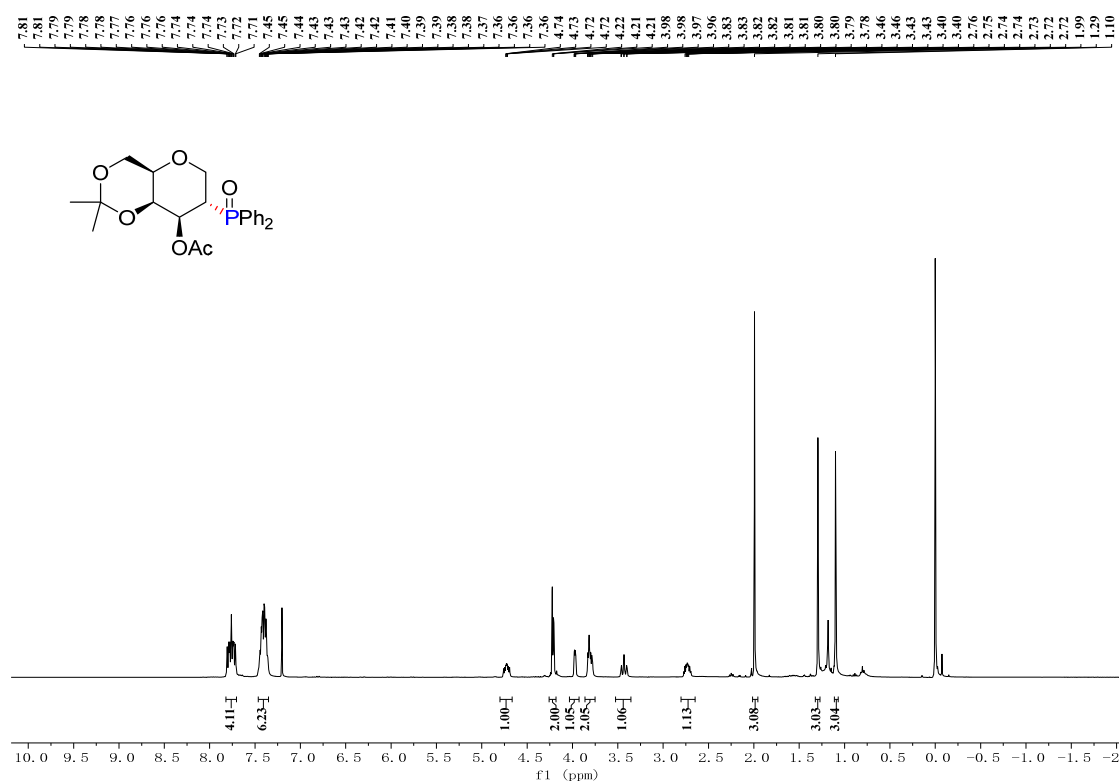

**<sup>13</sup>C NMR (CDCl<sub>3</sub>, 100 MHz) of **3g****

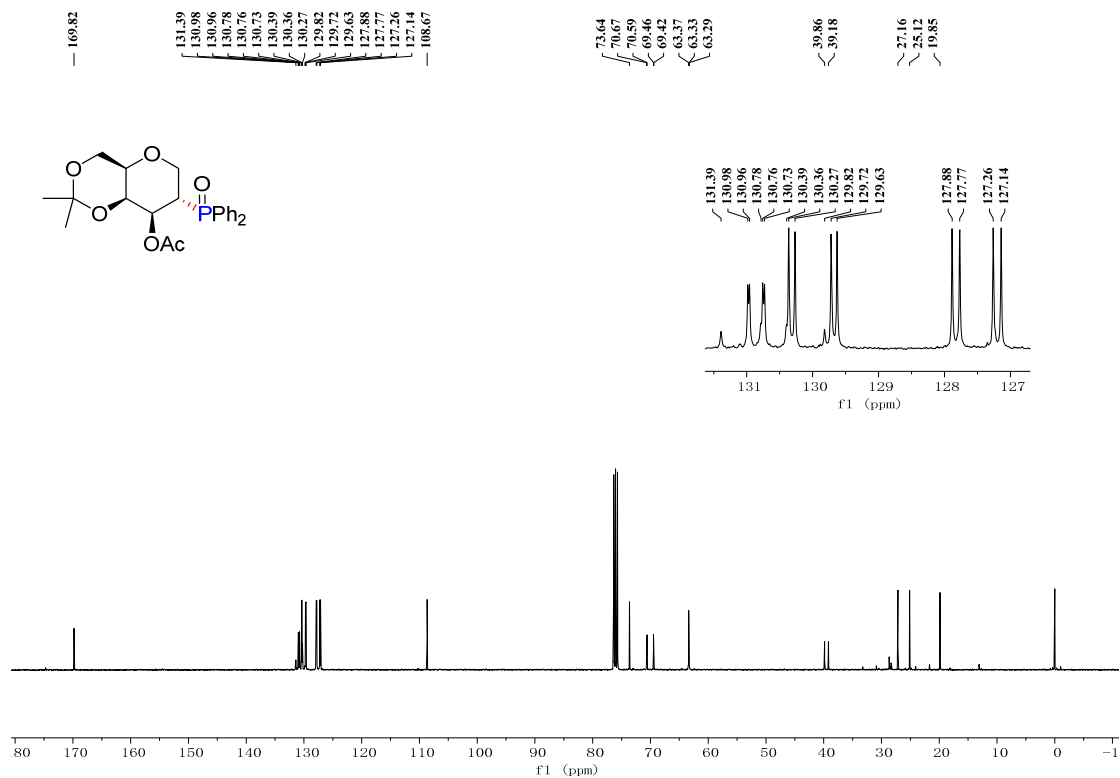



<sup>31</sup>P NMR (CDCl<sub>3</sub>, 162 MHz) of **3g**

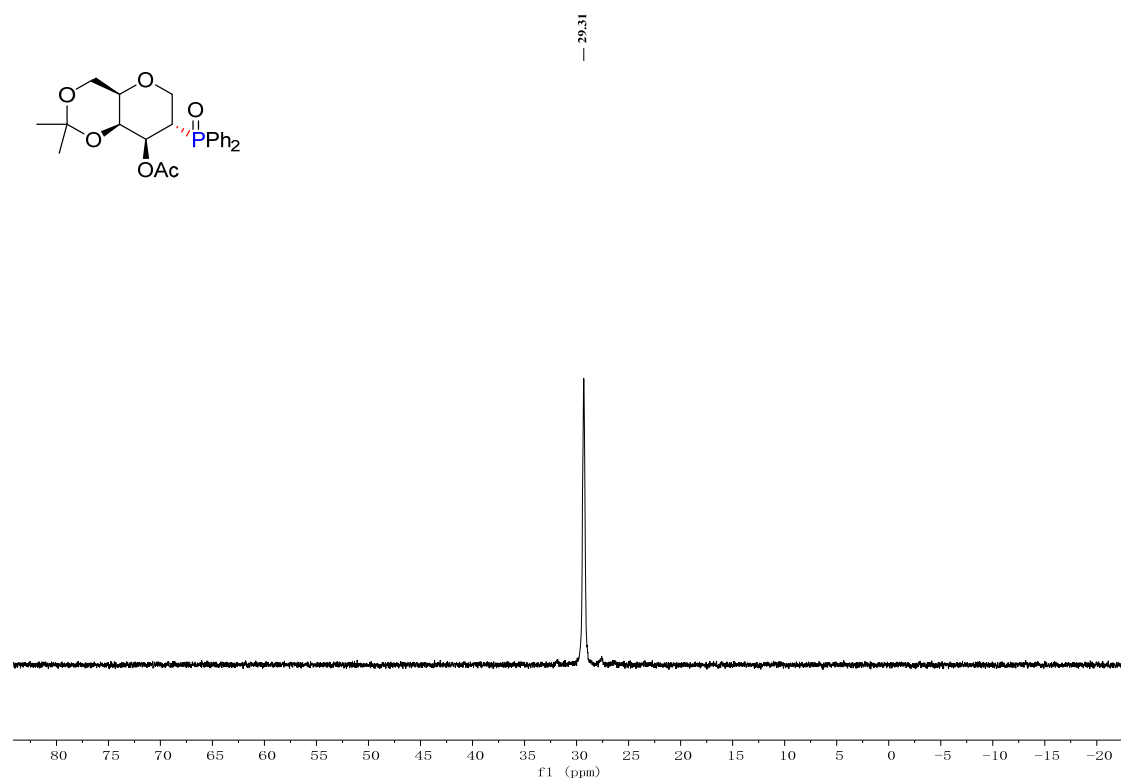

<sup>1</sup>H NMR (CDCl<sub>3</sub>, 400 MHz) of **3h**

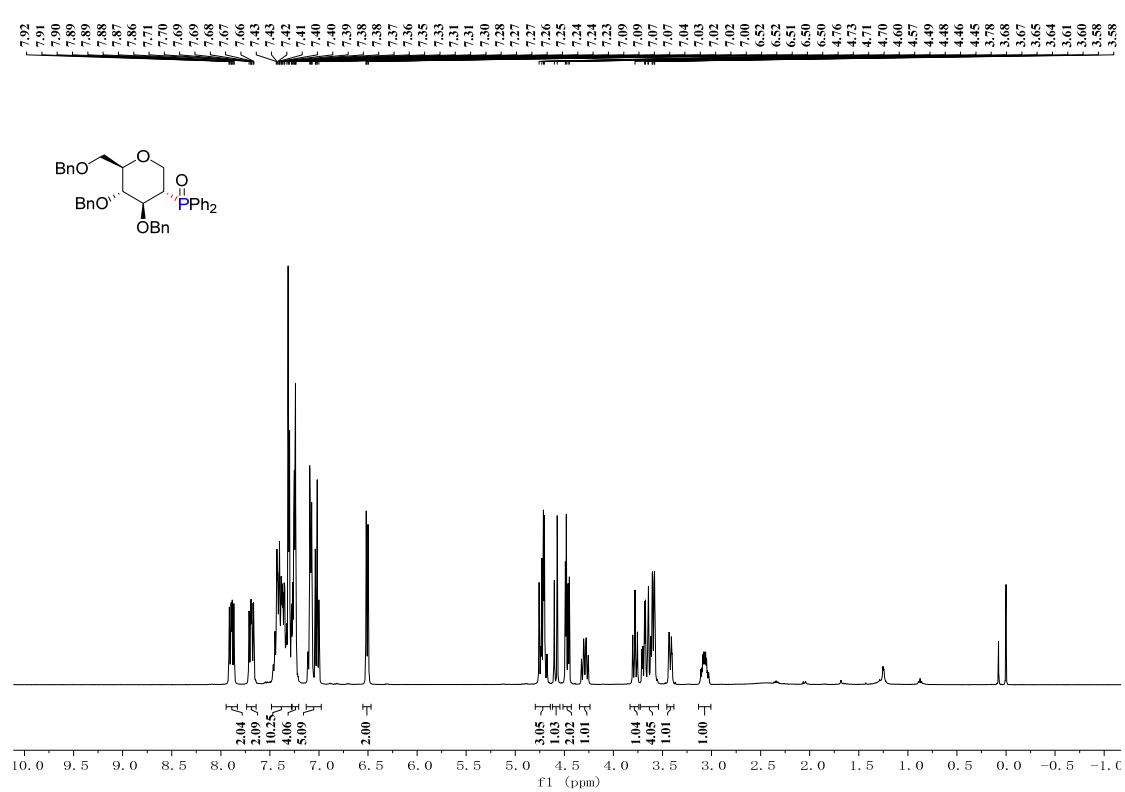



**$^{13}\text{C}$  NMR (CDCl<sub>3</sub>, 100 MHz) of **3h****

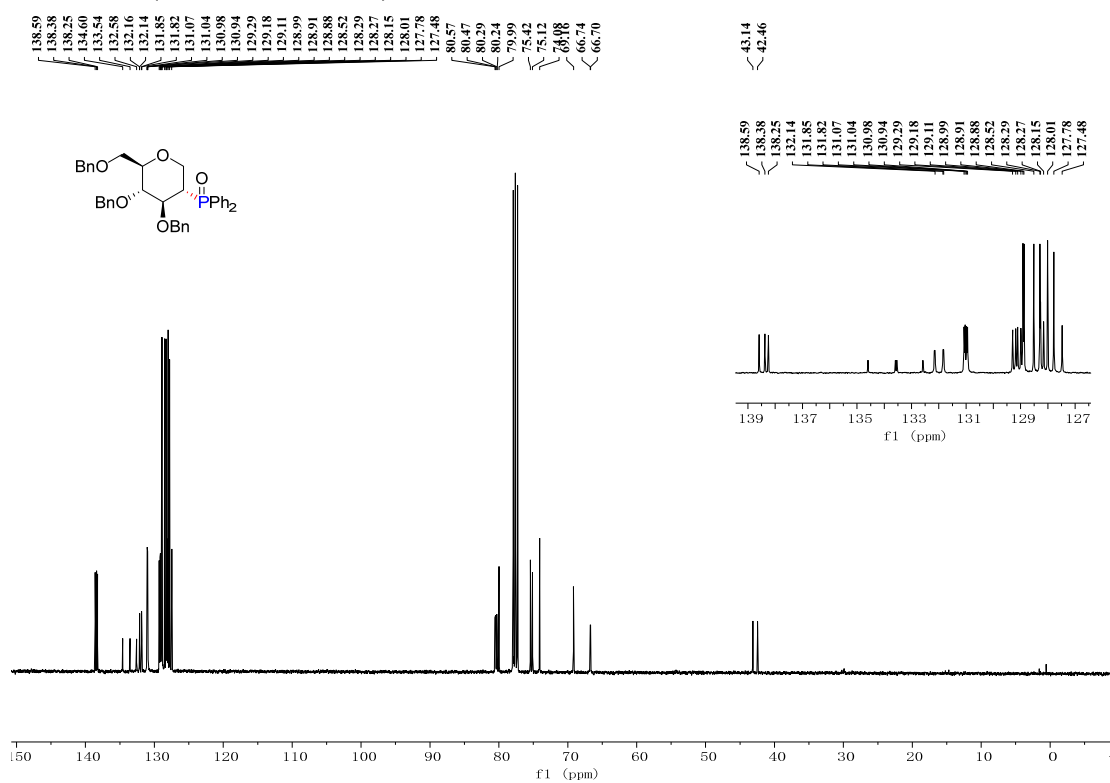

**$^{31}\text{P}$  NMR (CDCl<sub>3</sub>, 162 MHz) of **3h****

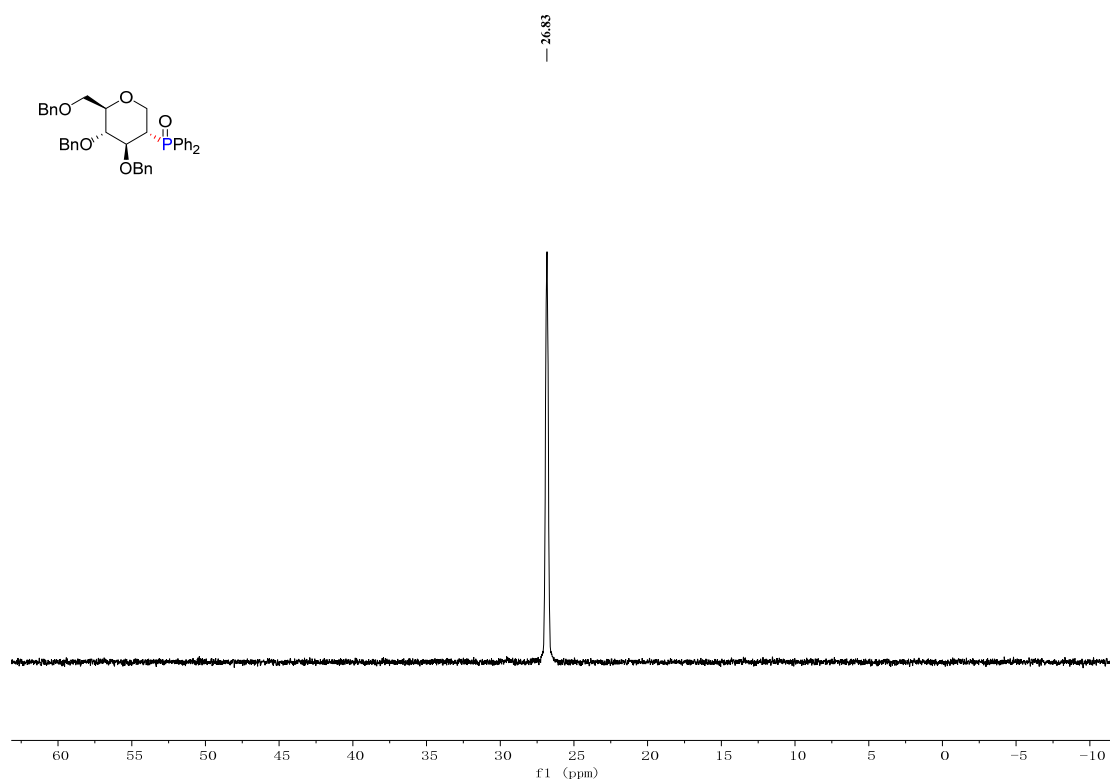



**$^1\text{H}$  NMR ( $\text{CDCl}_3$ , 400 MHz) of **3h'****

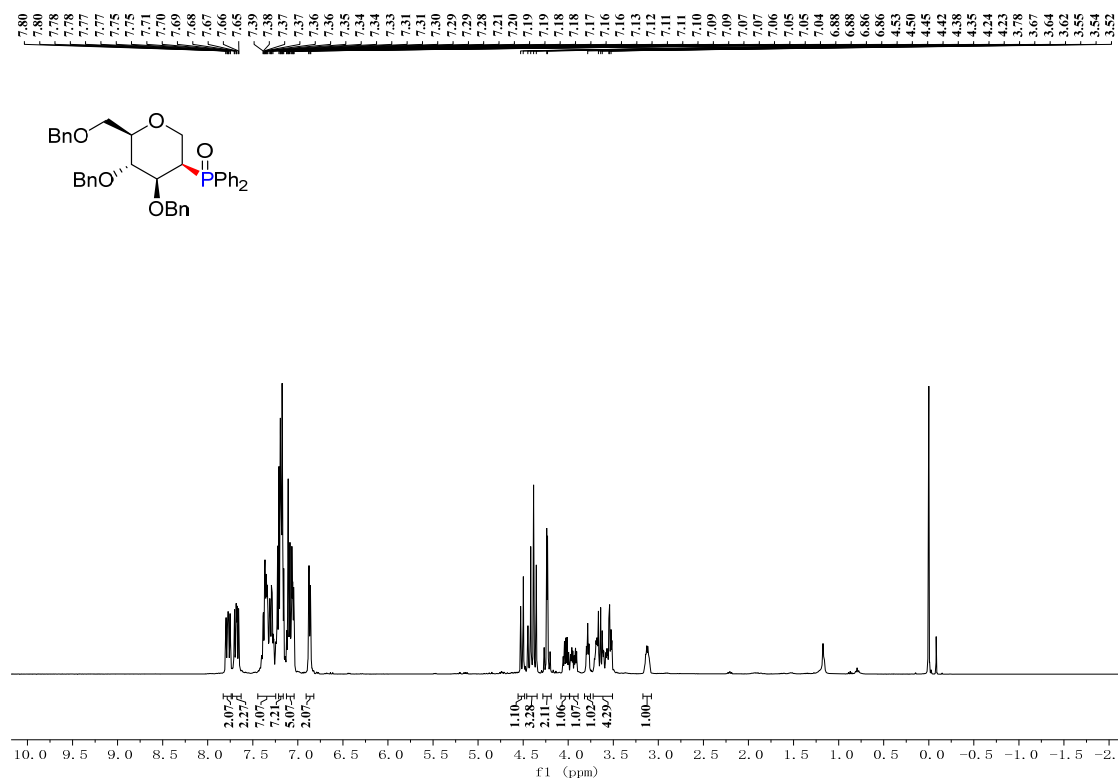

**$^{13}\text{C}$  NMR ( $\text{CDCl}_3$ , 100 MHz) of **3h'****

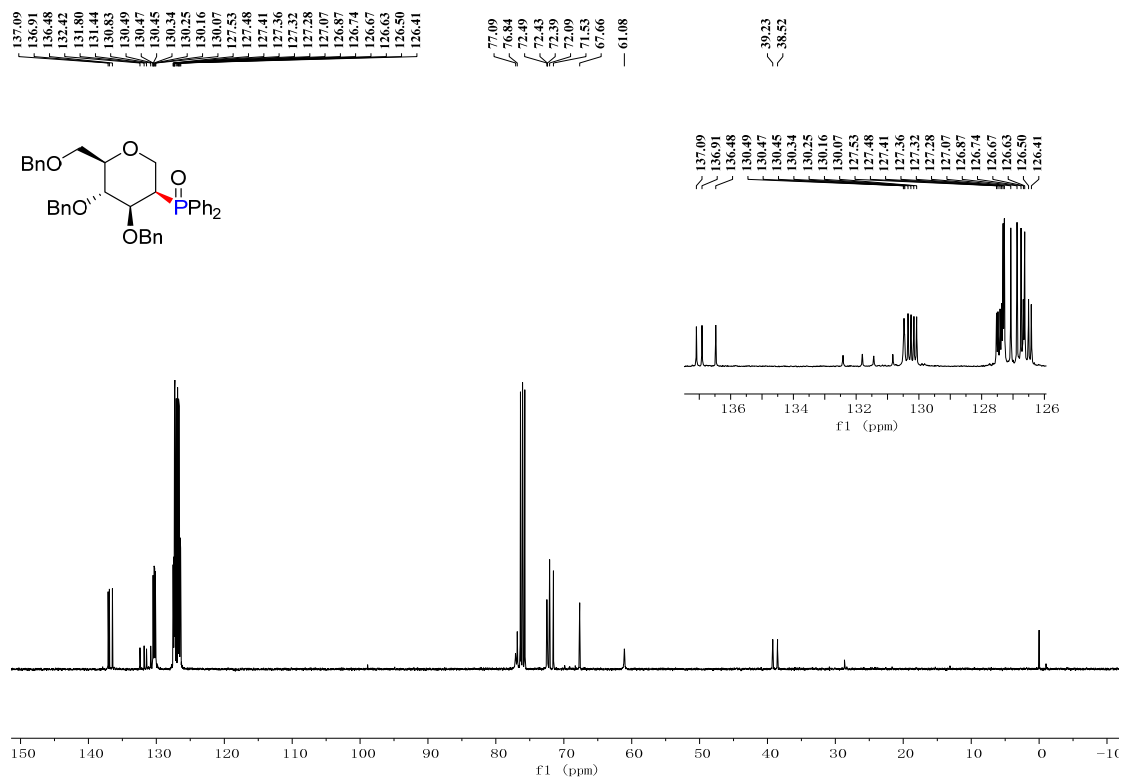



**<sup>31</sup>P NMR (CDCl<sub>3</sub>, 162 MHz) of **3h'****

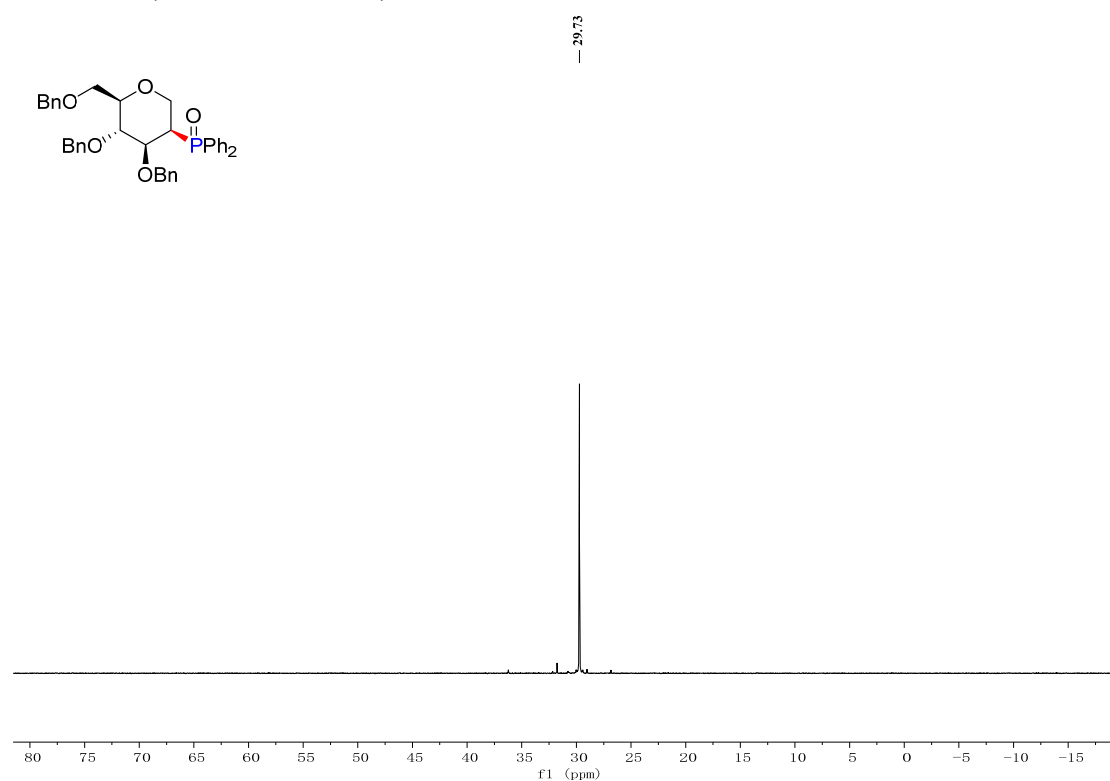

**<sup>1</sup>H NMR (CDCl<sub>3</sub>, 400 MHz) of **3i****

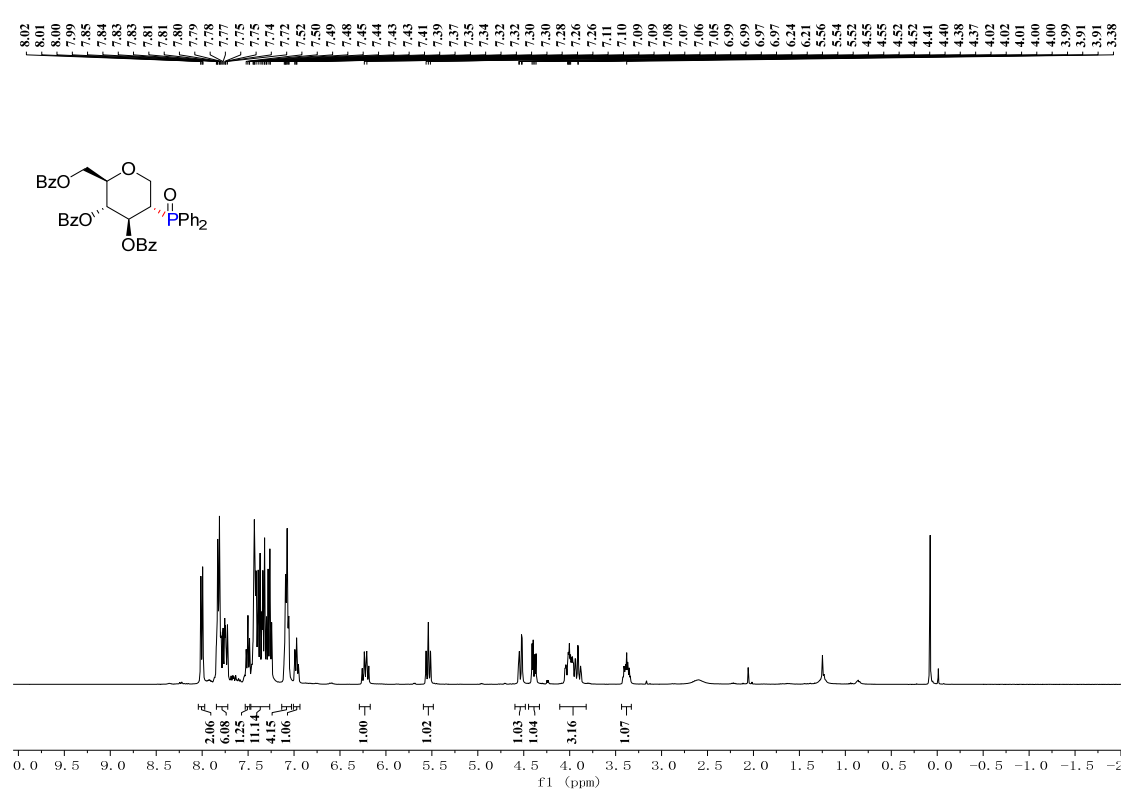



**$^{13}\text{C}$  NMR (CDCl<sub>3</sub>, 100 MHz) of **3i****

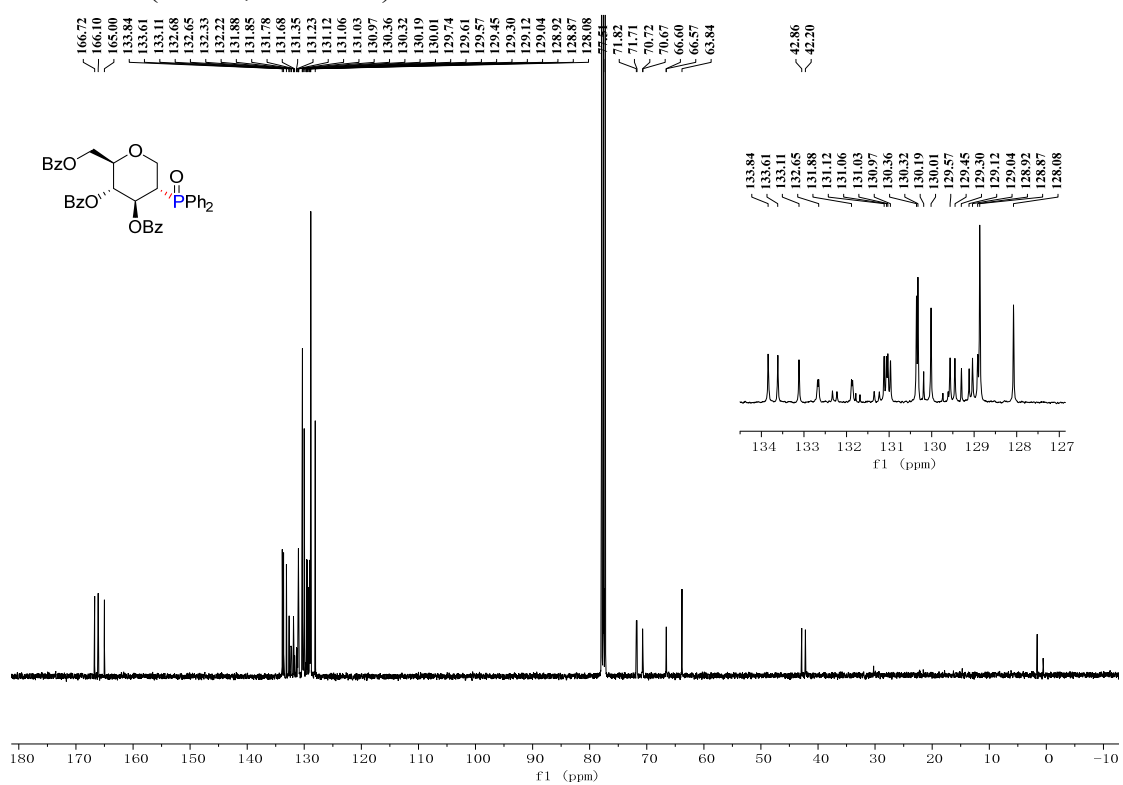

**$^{31}\text{P}$  NMR (CDCl<sub>3</sub>, 162 MHz) of **3i****

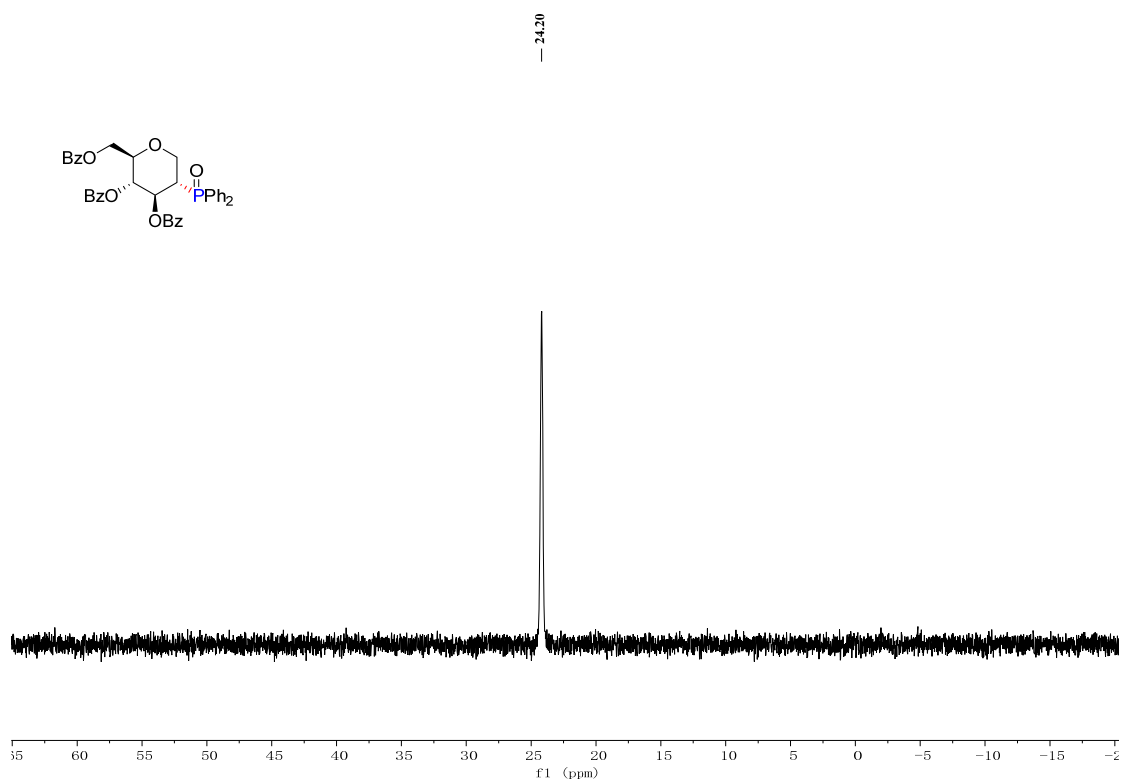



**$^1\text{H}$  NMR ( $\text{CDCl}_3$ , 400 MHz) of **3i'****

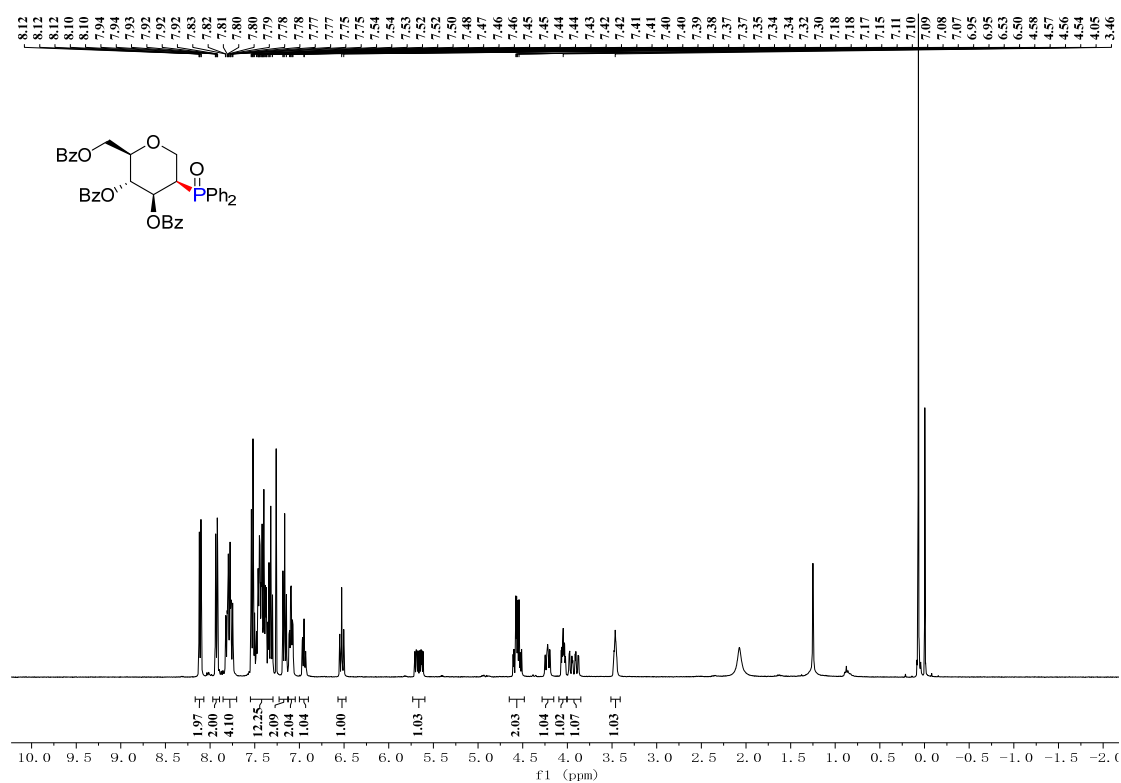

**$^{13}\text{C}$  NMR ( $\text{CDCl}_3$ , 100 MHz) of **3i'****

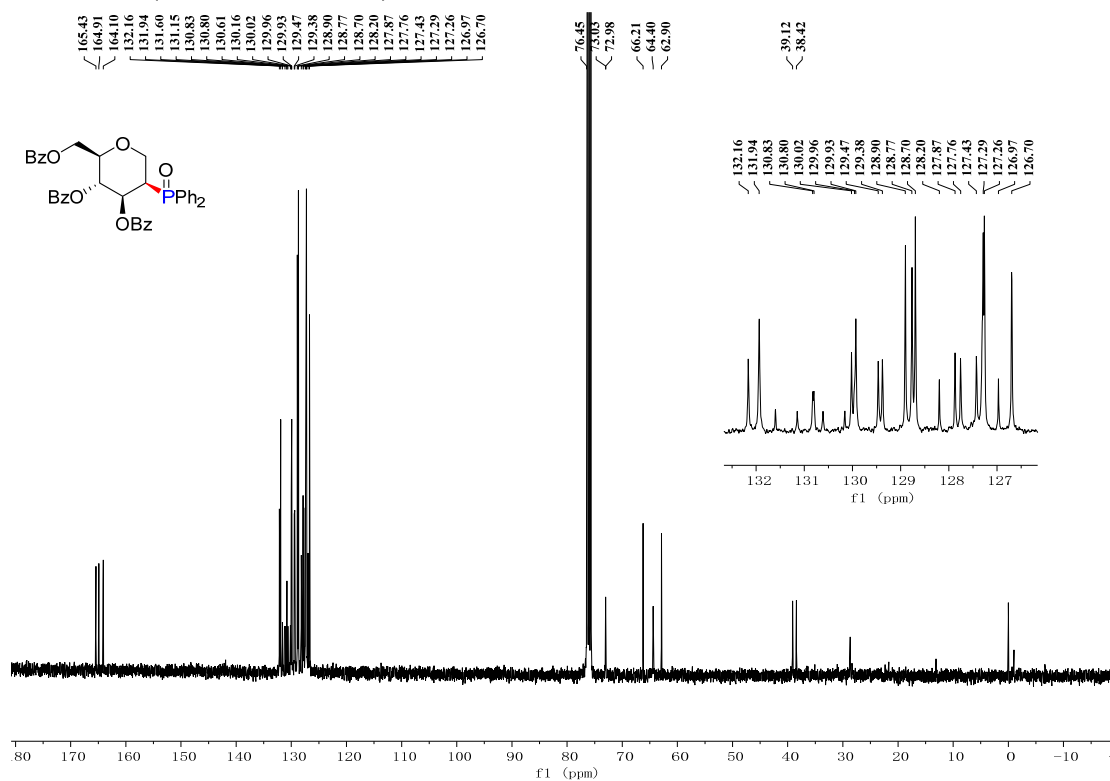



**$^{31}\text{P}$  NMR (CDCl<sub>3</sub>, 162 MHz) of **3i'****

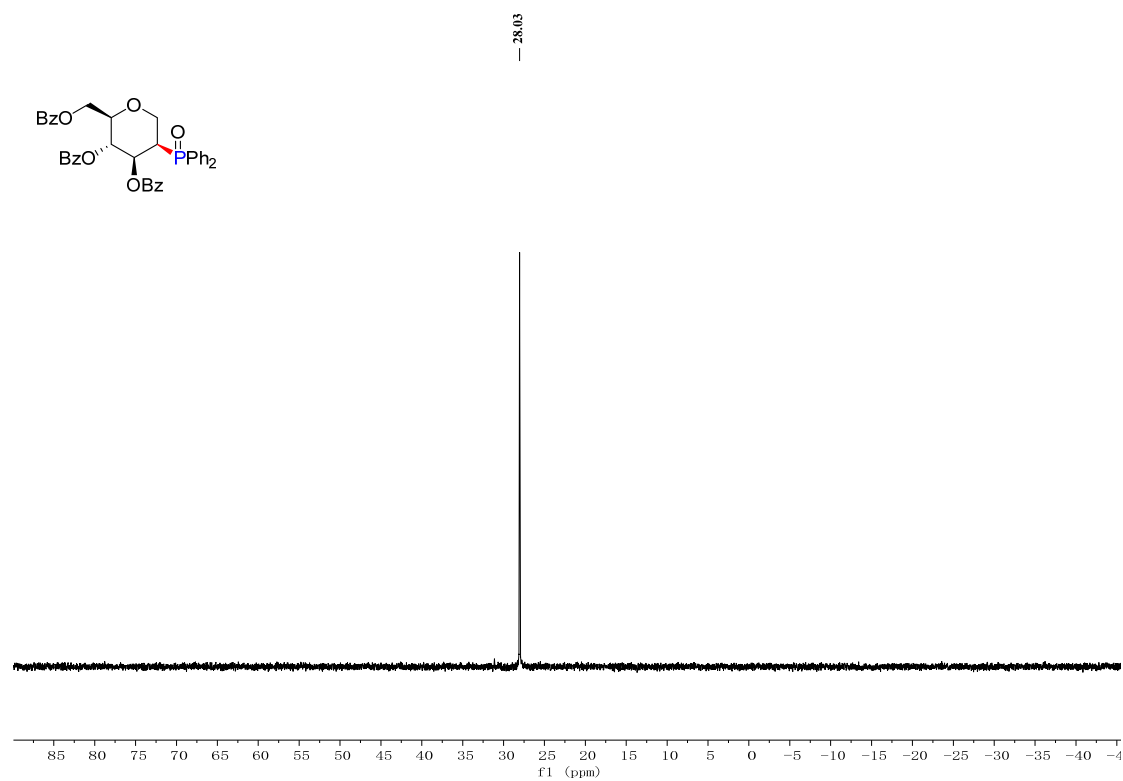

**$^1\text{H}$  NMR (CDCl<sub>3</sub>, 400 MHz) of **3j****

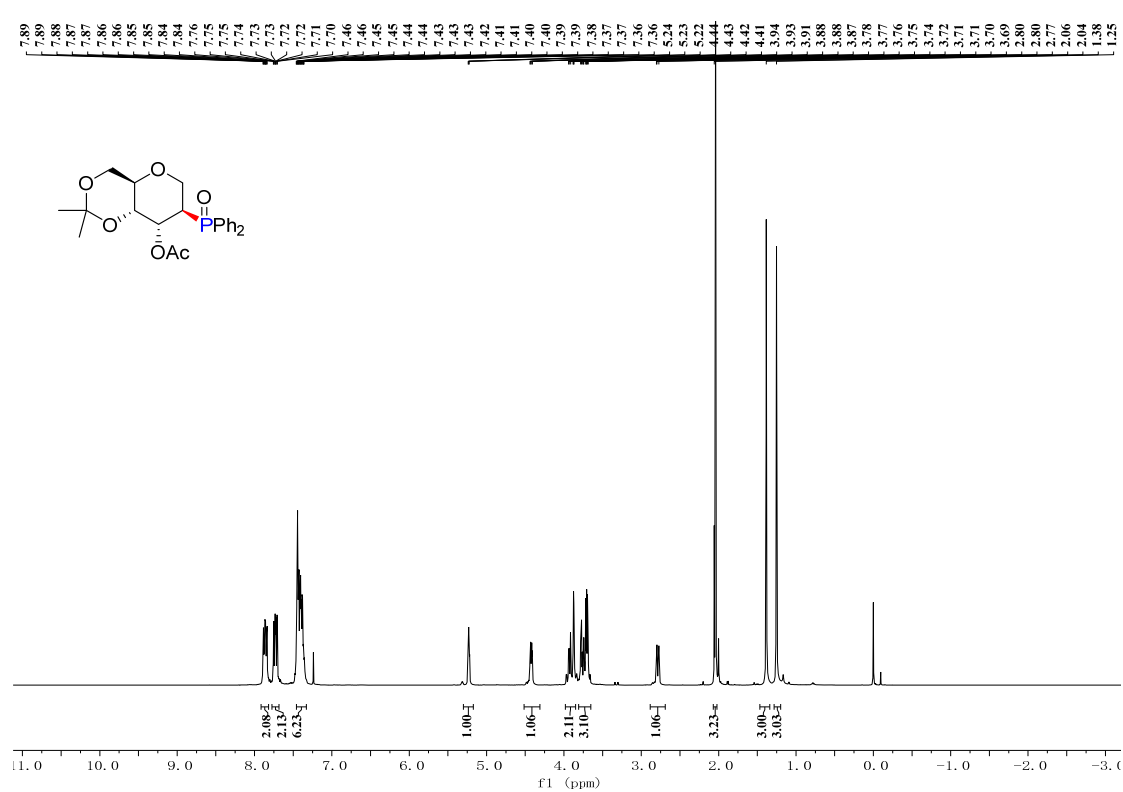



**<sup>13</sup>C NMR (CDCl<sub>3</sub>, 100 MHz) of **3j****

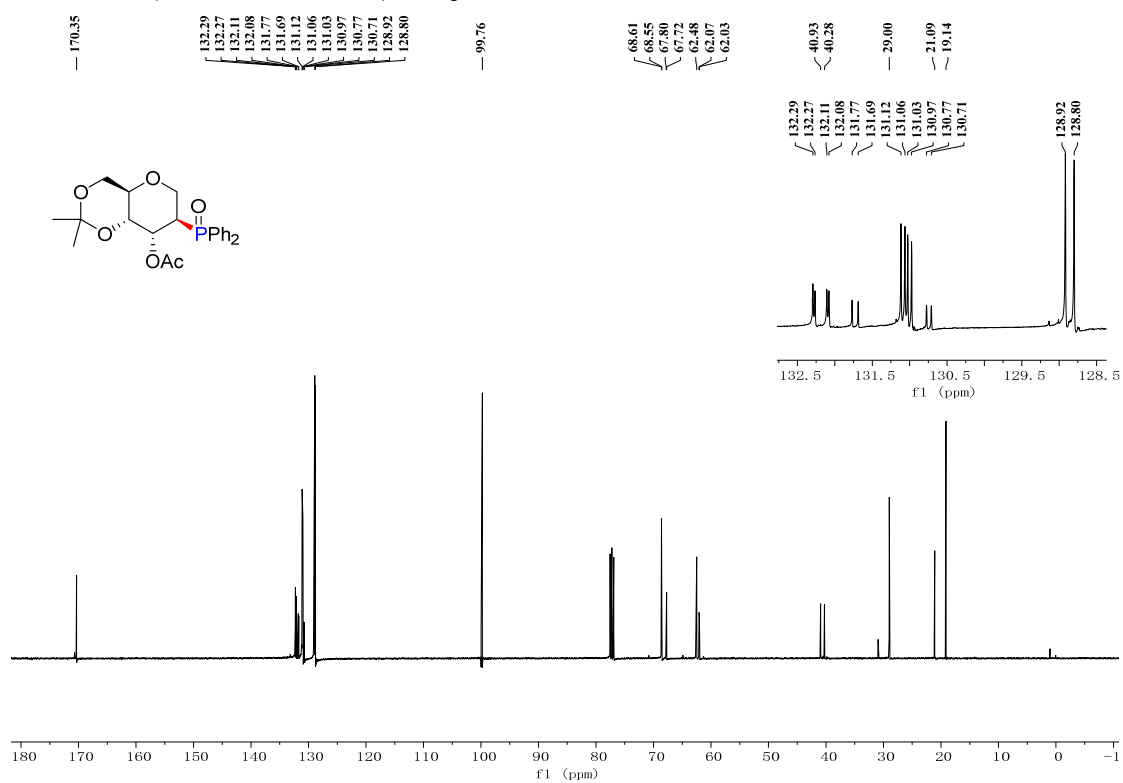

**<sup>31</sup>P NMR (CDCl<sub>3</sub>, 162 MHz) of **3j****

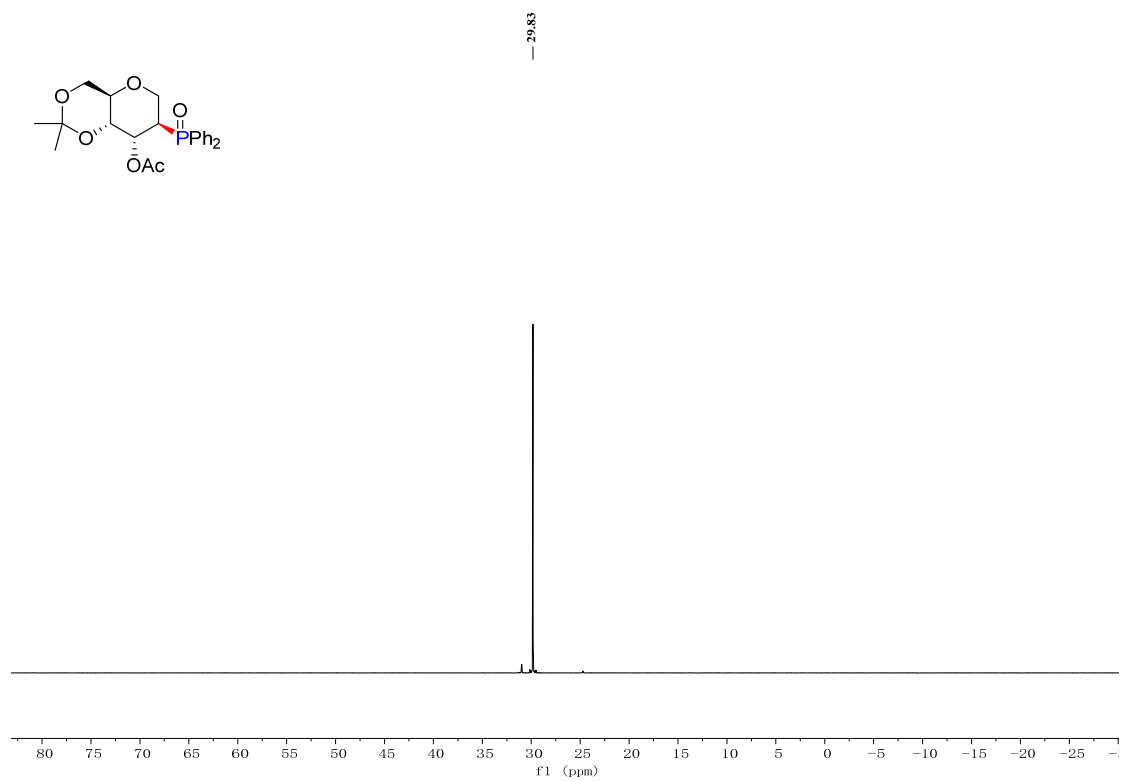



**$^1\text{H}$  NMR ( $\text{CDCl}_3$ , 400 MHz) of **3k****

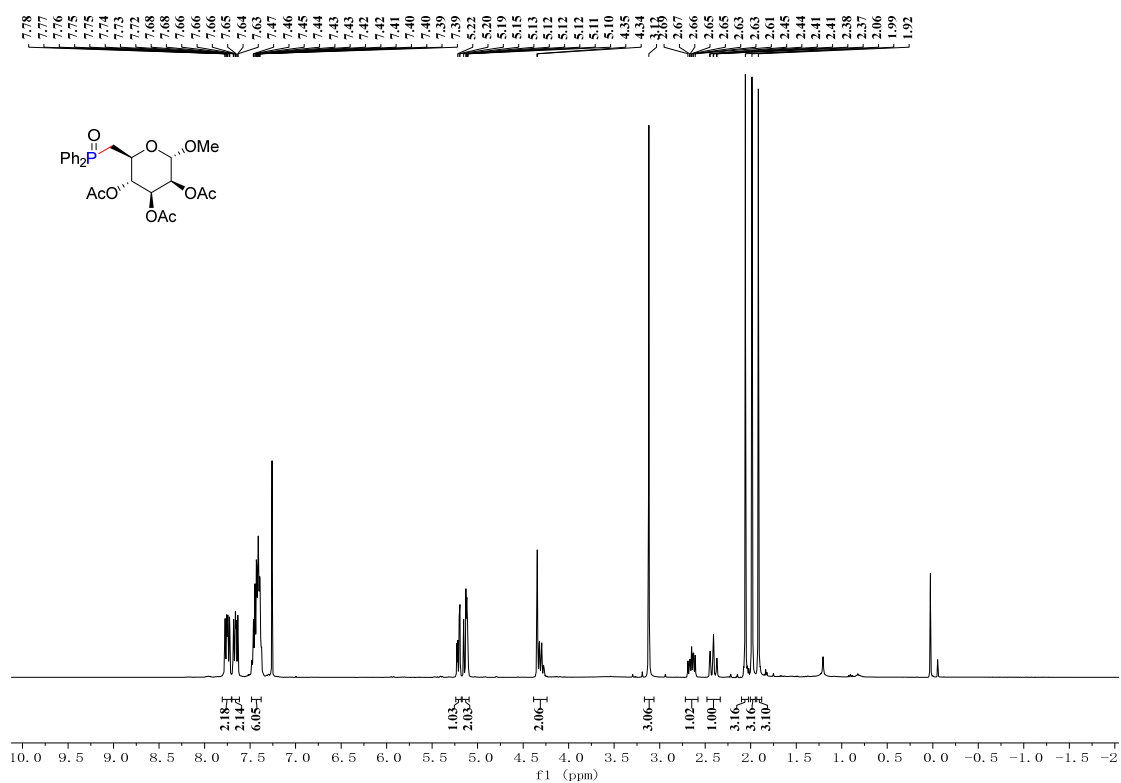

**$^{13}\text{C}$  NMR ( $\text{CDCl}_3$ , 100 MHz) of **3k****

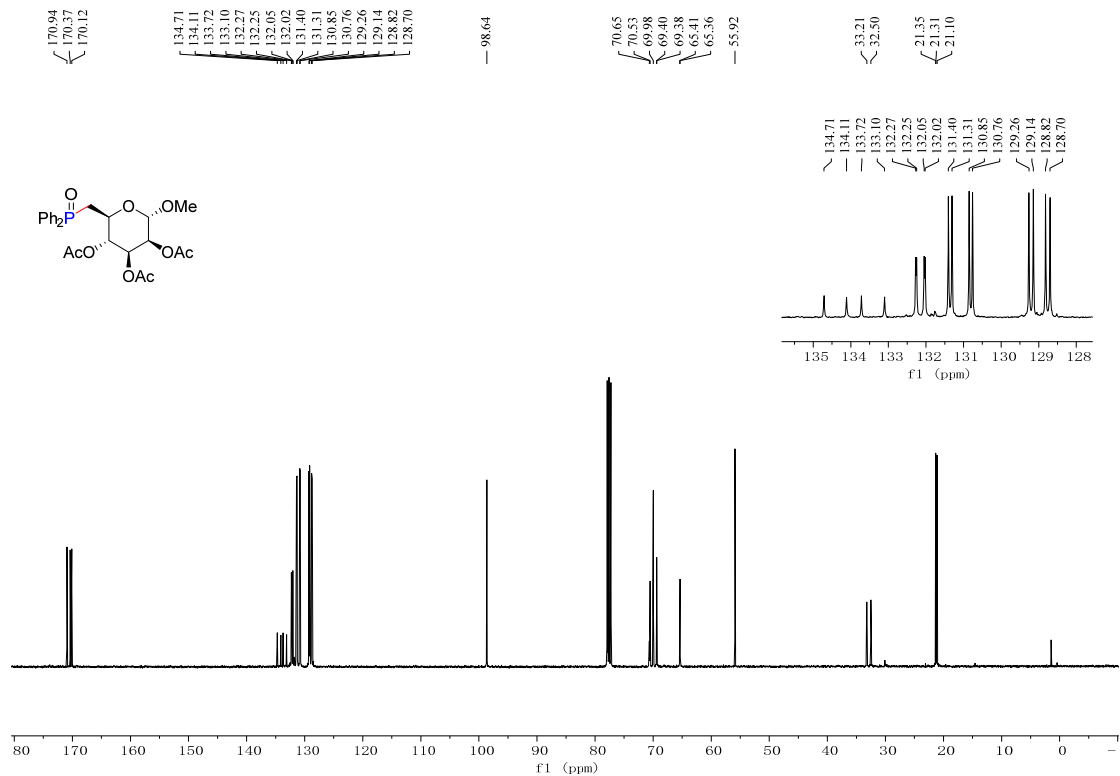



**$^{31}\text{P}$  NMR (CDCl<sub>3</sub>, 162 MHz) of **3k****

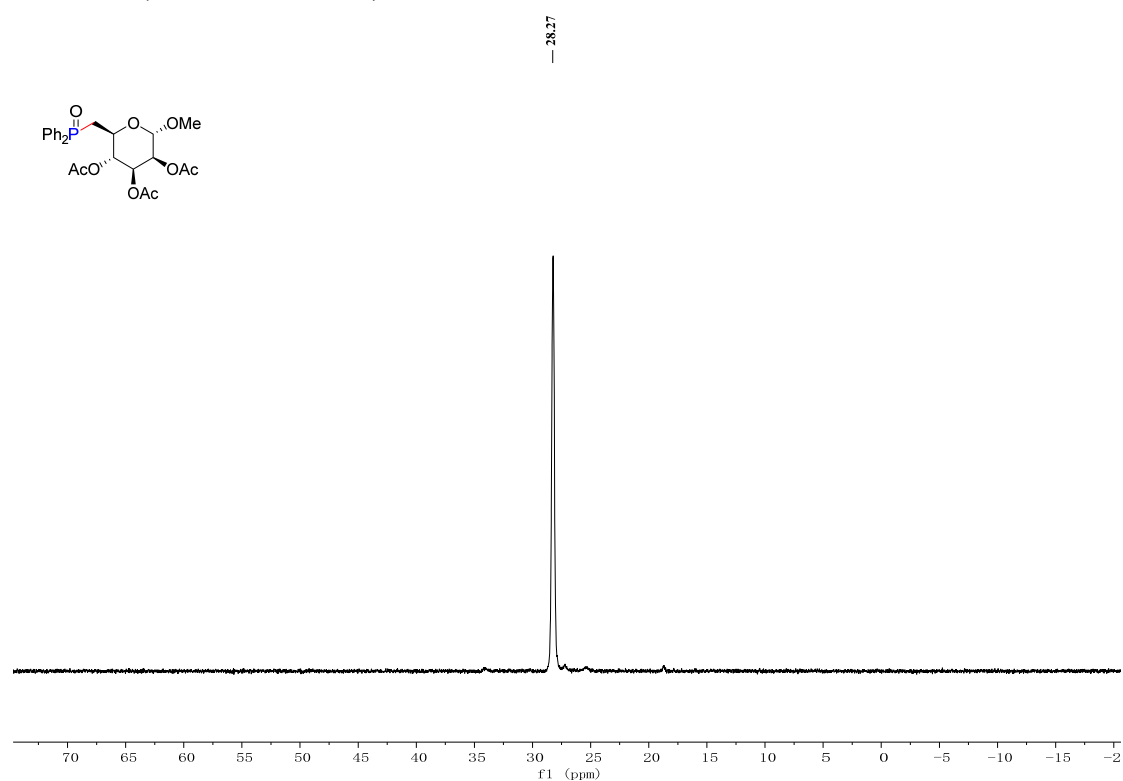

**$^1\text{H}$  NMR (CDCl<sub>3</sub>, 400 MHz) of **3m****

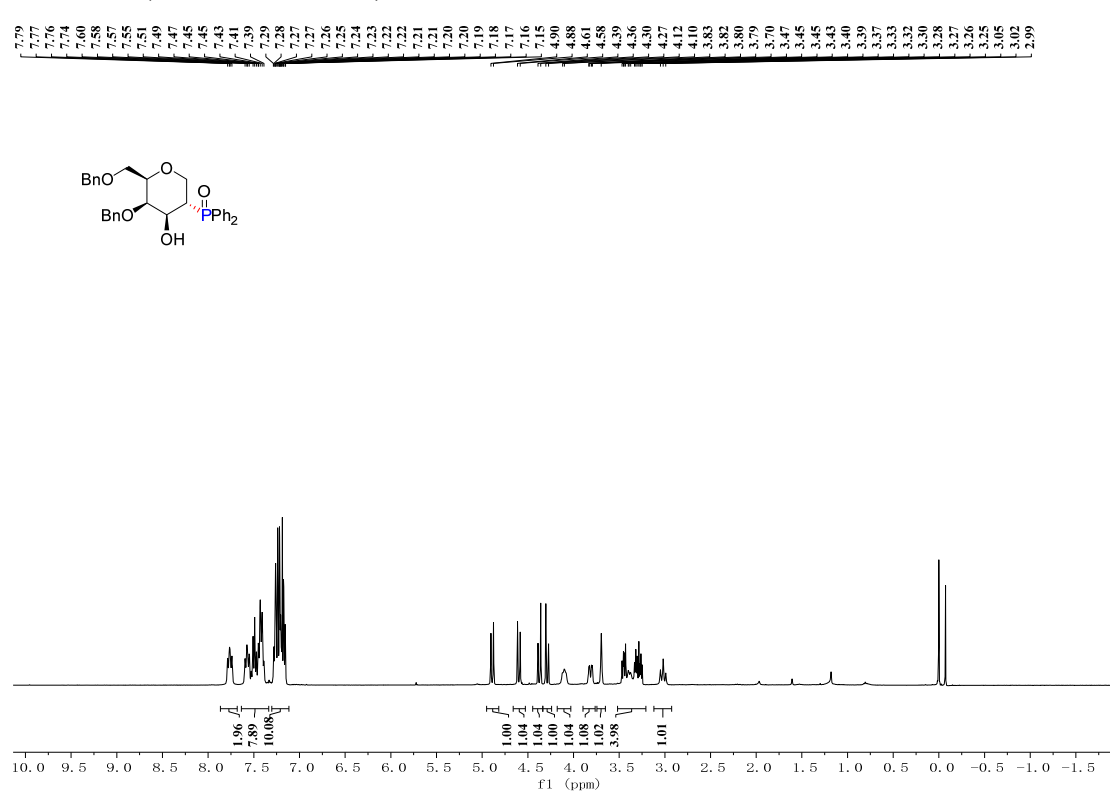



**$^{13}\text{C}$  NMR (CDCl<sub>3</sub>, 100 MHz) of **3m****

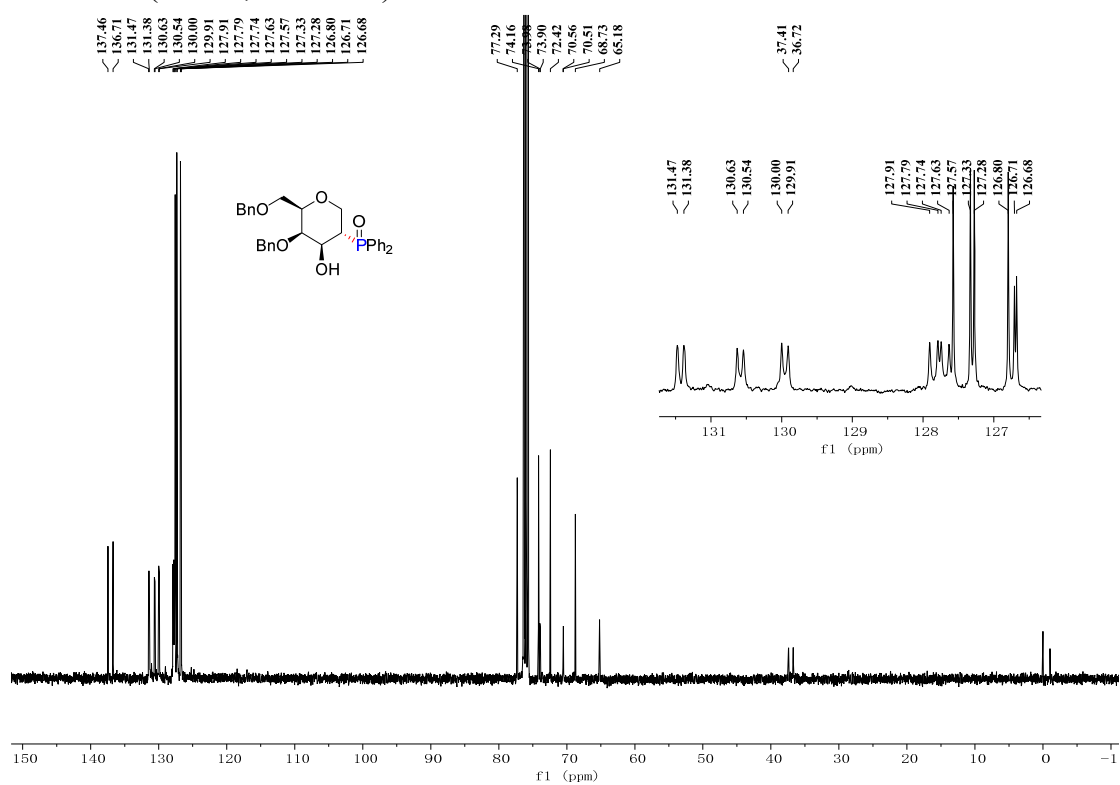

**$^{31}\text{P}$  NMR (CDCl<sub>3</sub>, 162 MHz) of **3m****

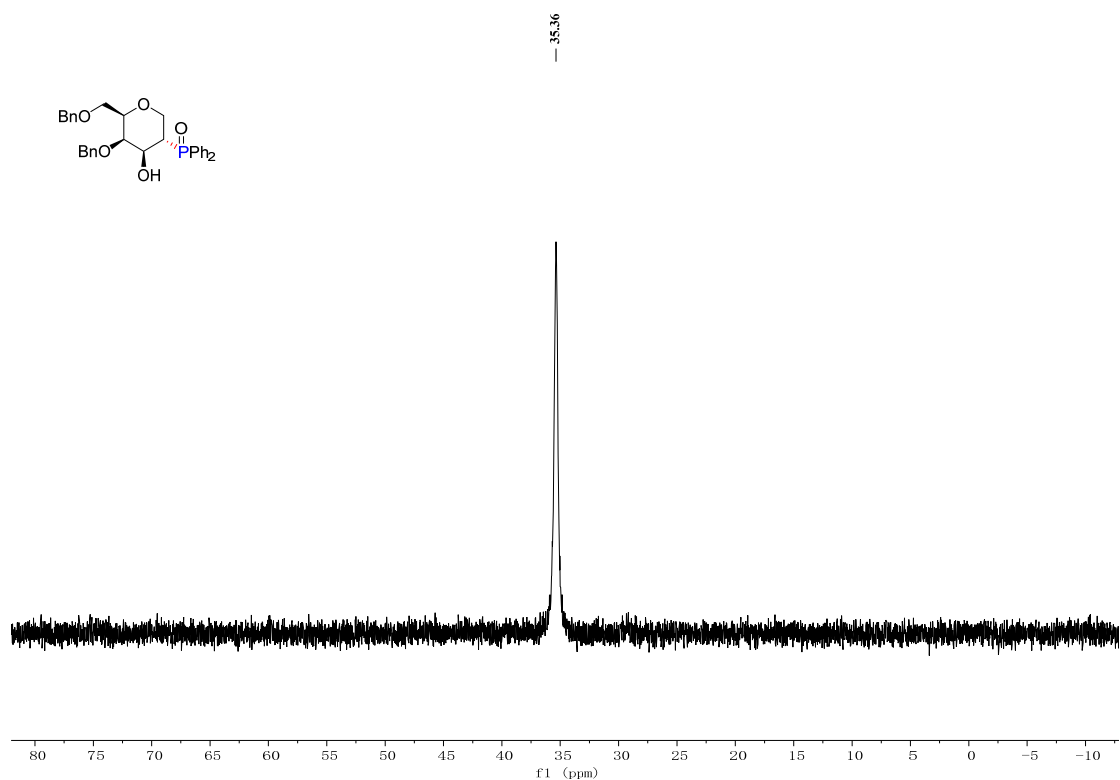



**$^1\text{H}$  NMR ( $\text{CDCl}_3$ , 400 MHz) of **3n****

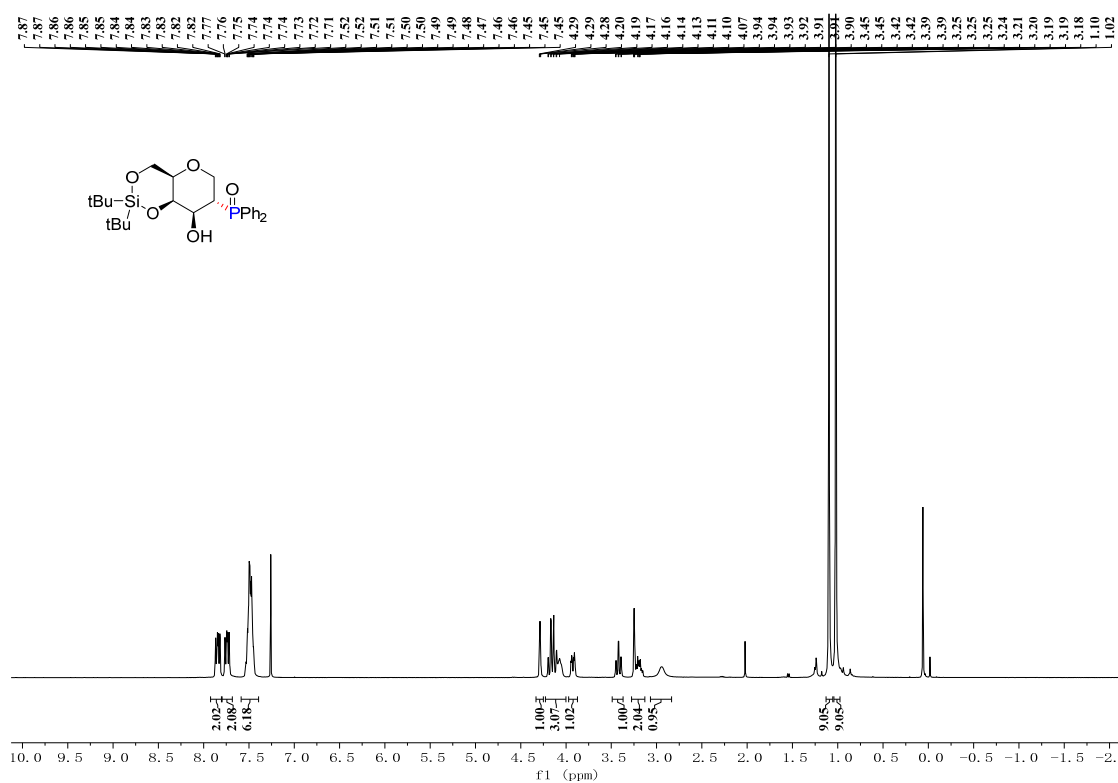

**$^{13}\text{C}$  NMR ( $\text{CDCl}_3$ , 100 MHz) of **3n****

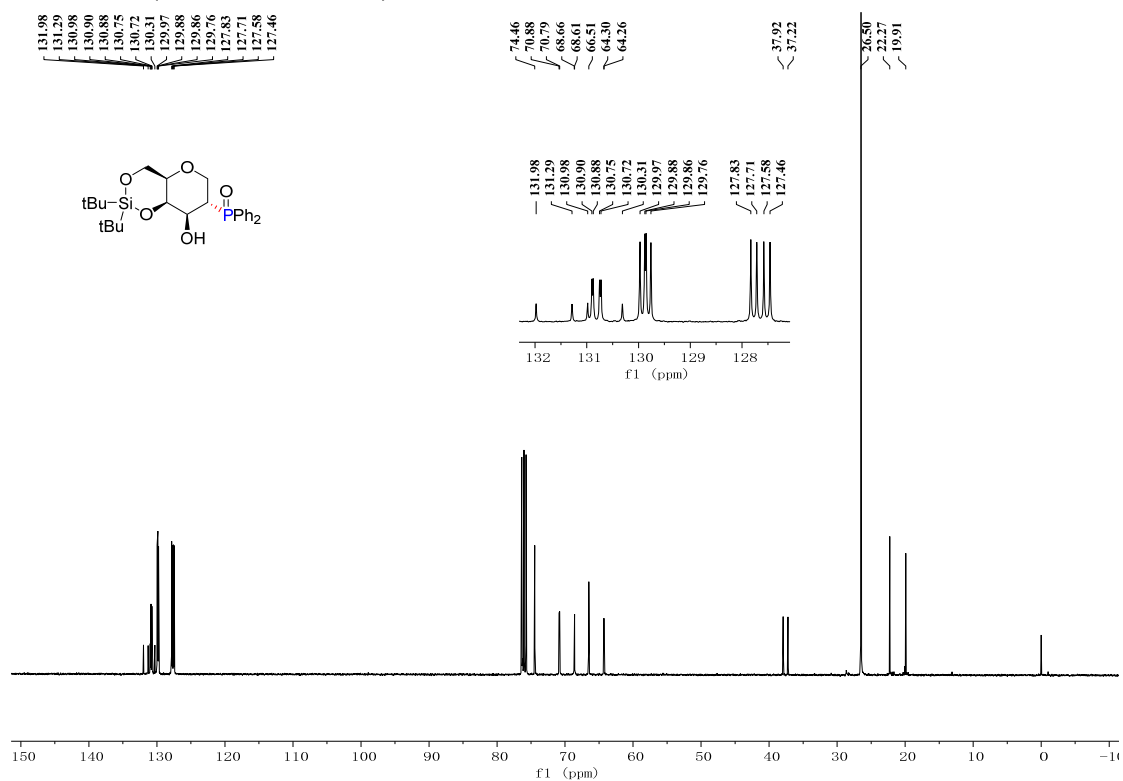



**$^{31}\text{P}$  NMR (CDCl<sub>3</sub>, 162 MHz) of **3n****

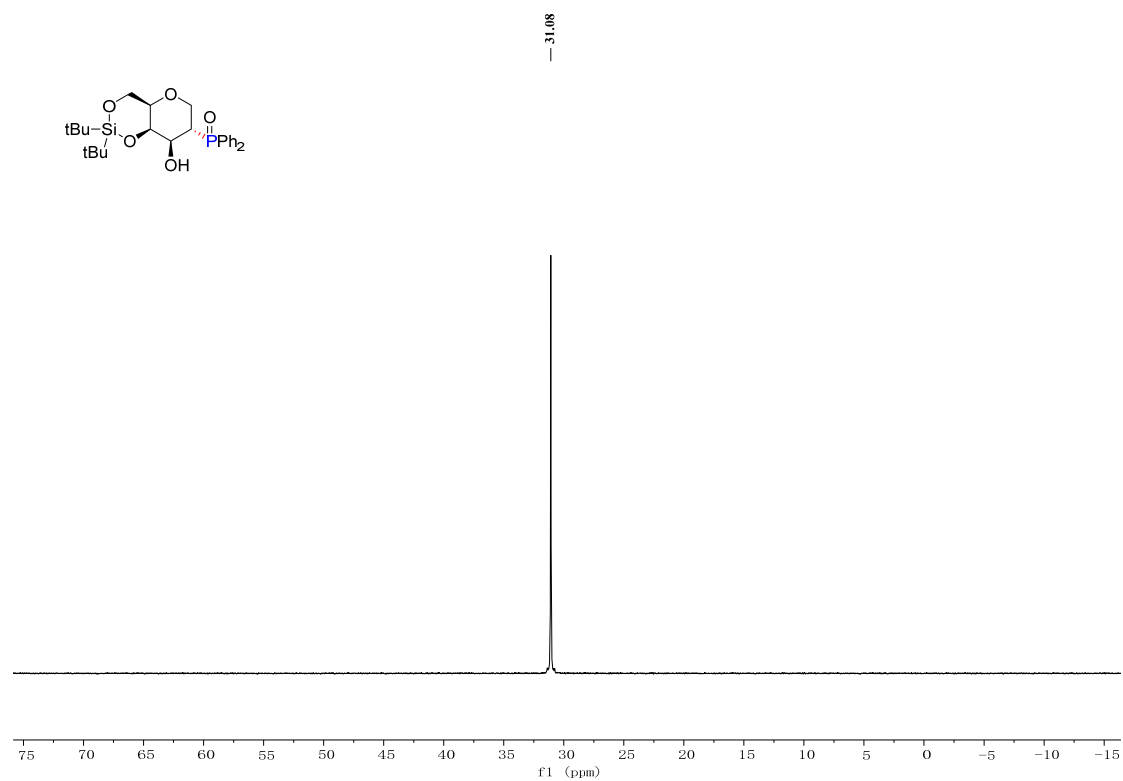

**$^1\text{H}$  NMR (CDCl<sub>3</sub>, 400 MHz) of **3o****

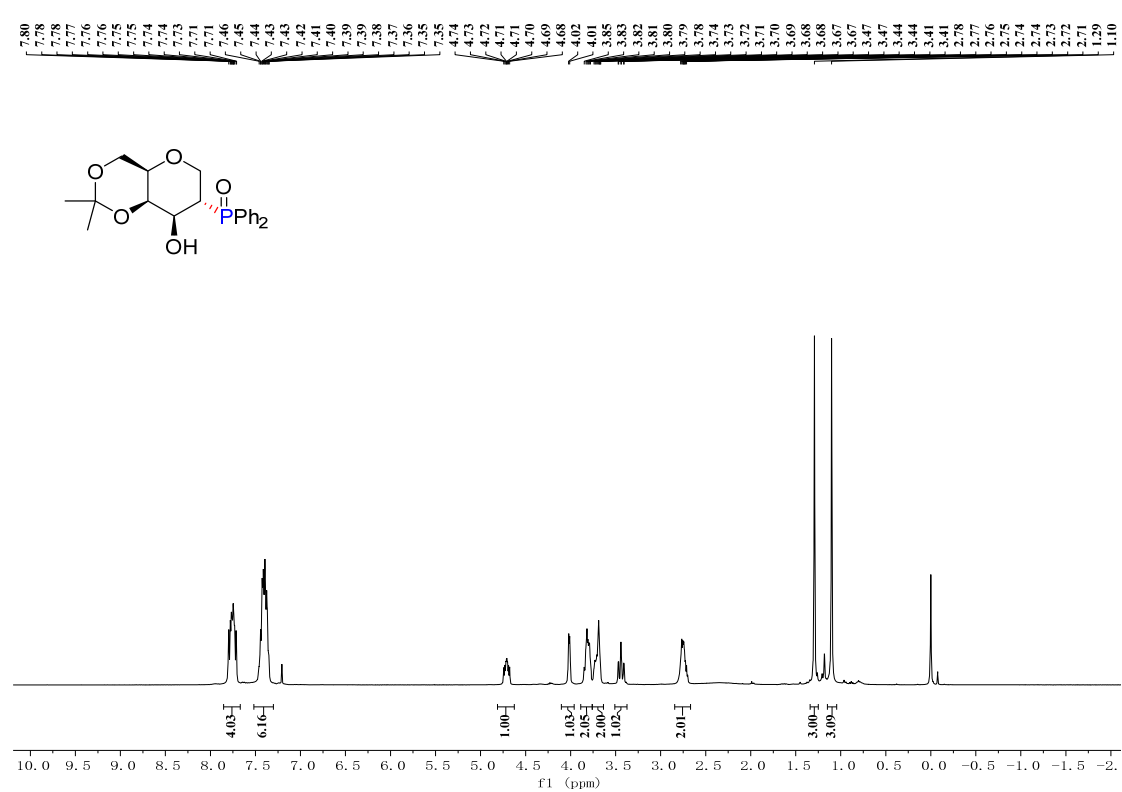



**$^{13}\text{C}$  NMR (CDCl<sub>3</sub>, 100 MHz) of **3o****

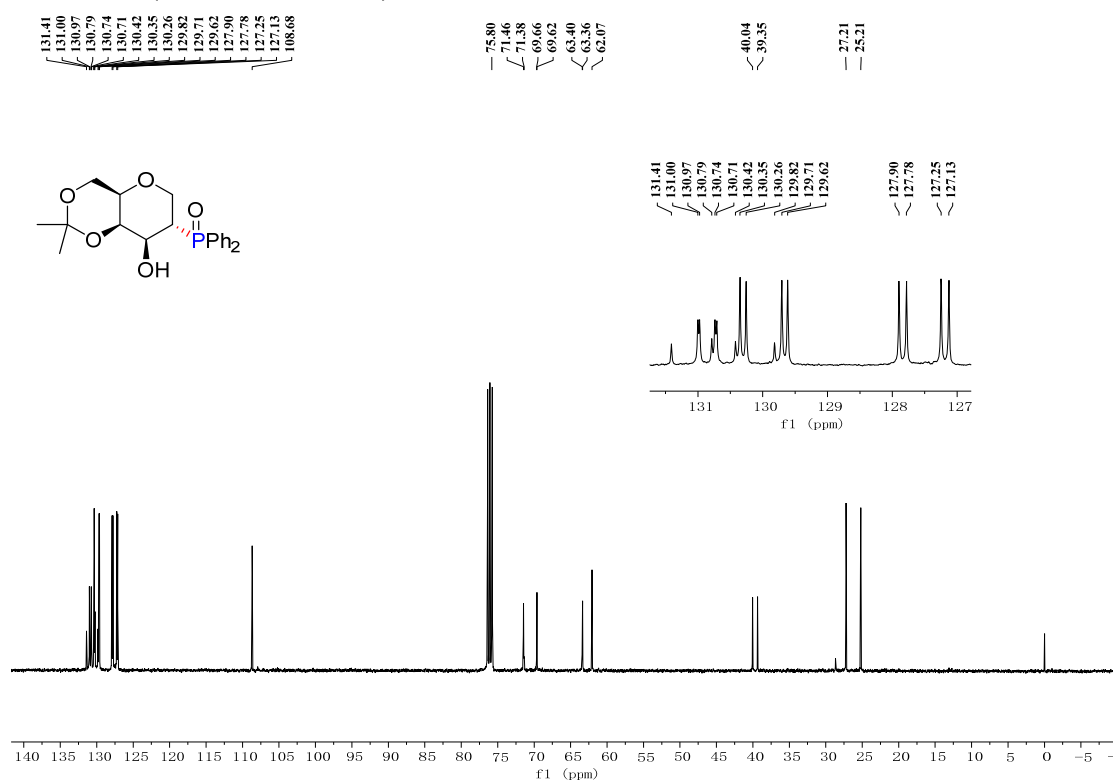

**$^{31}\text{P}$  NMR (CDCl<sub>3</sub>, 162 MHz) of **3o****

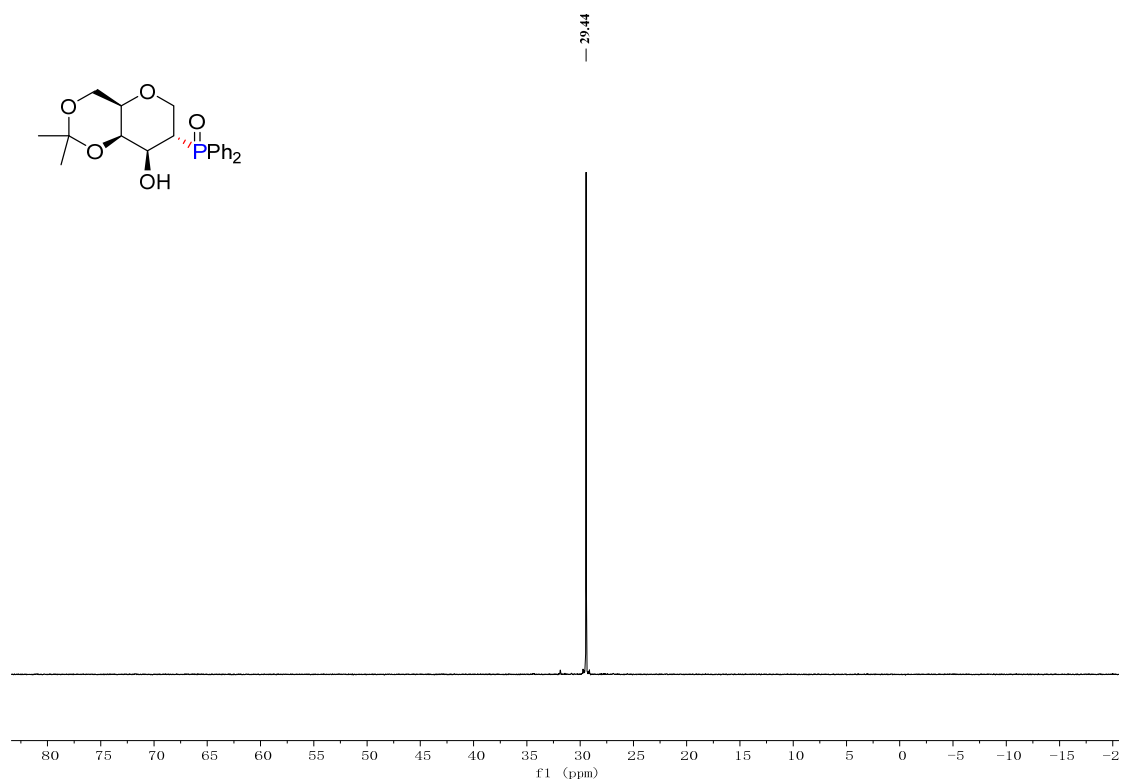



**$^1\text{H}$  NMR ( $\text{CDCl}_3$ , 400 MHz) of **3p****

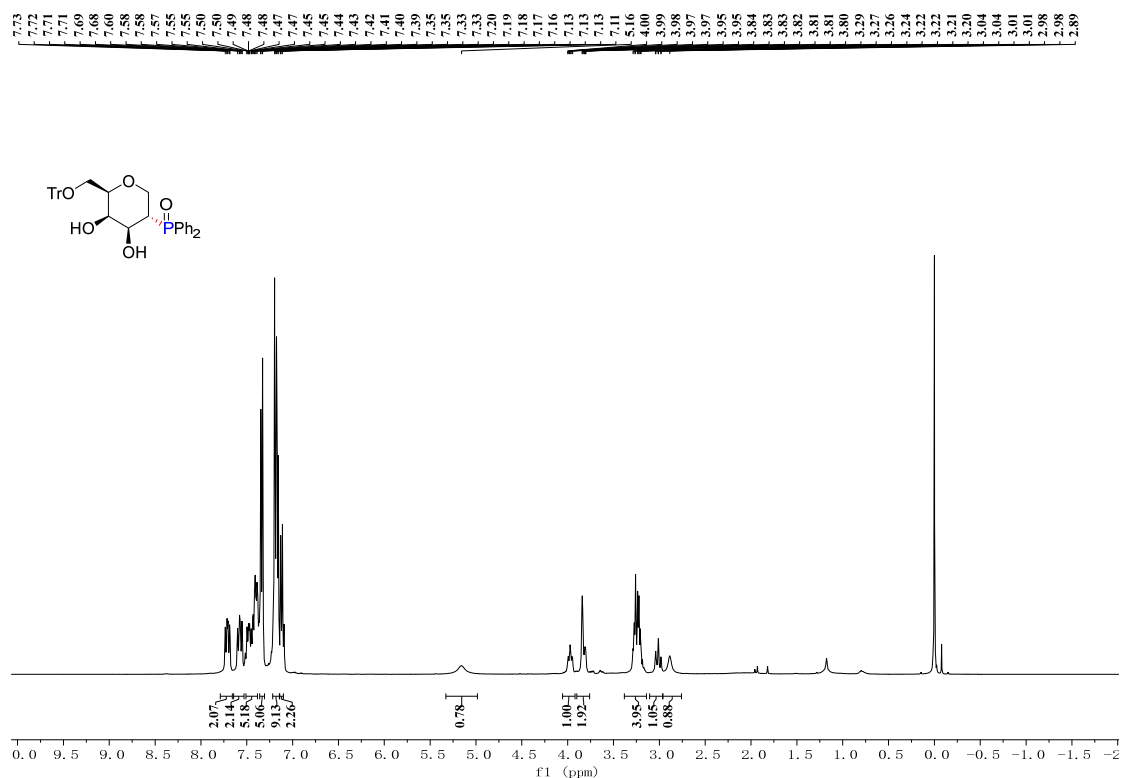

**$^{13}\text{C}$  NMR ( $\text{CDCl}_3$ , 100 MHz) of **3p****

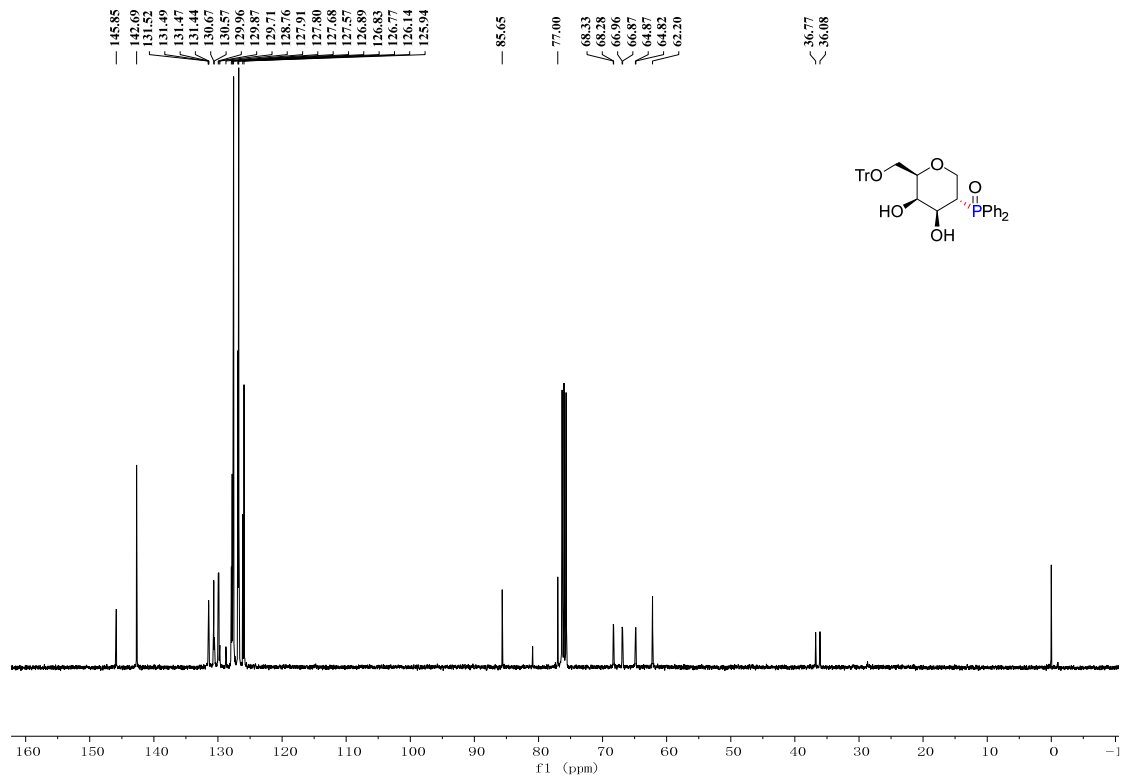



**$^{31}\text{P}$  NMR (CDCl<sub>3</sub>, 162 MHz) of **3p****

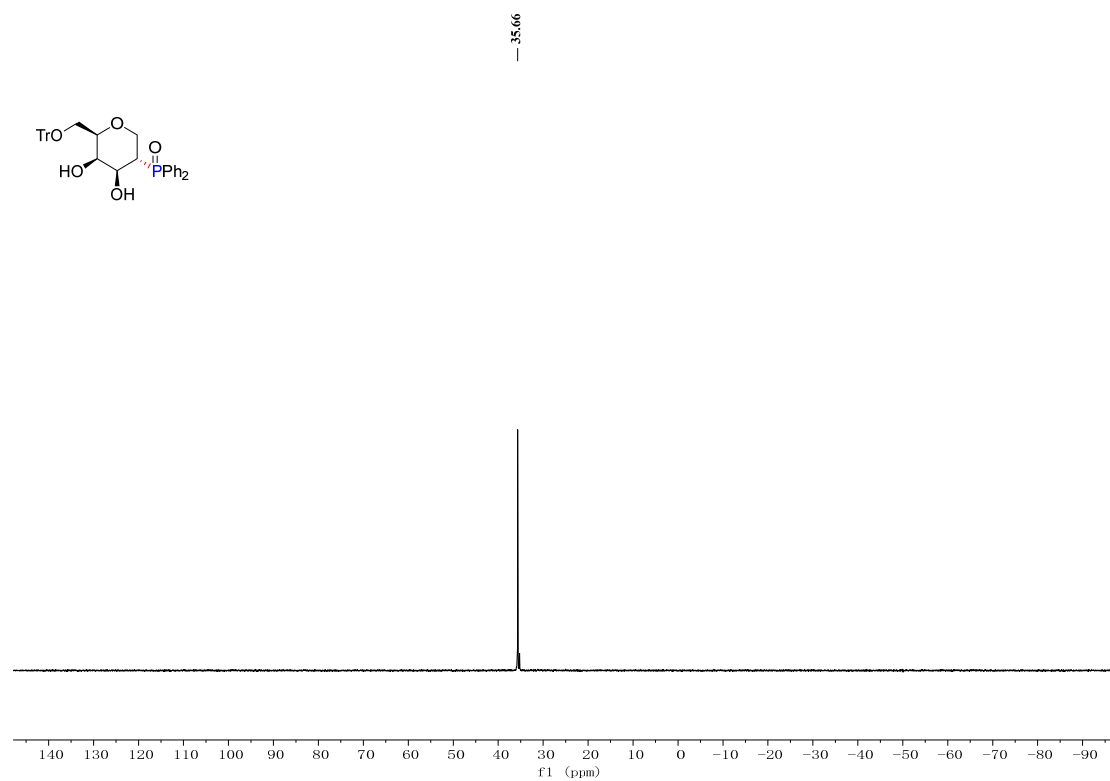

**$^1\text{H}$  NMR (CDCl<sub>3</sub>, 400 MHz) of **3q****

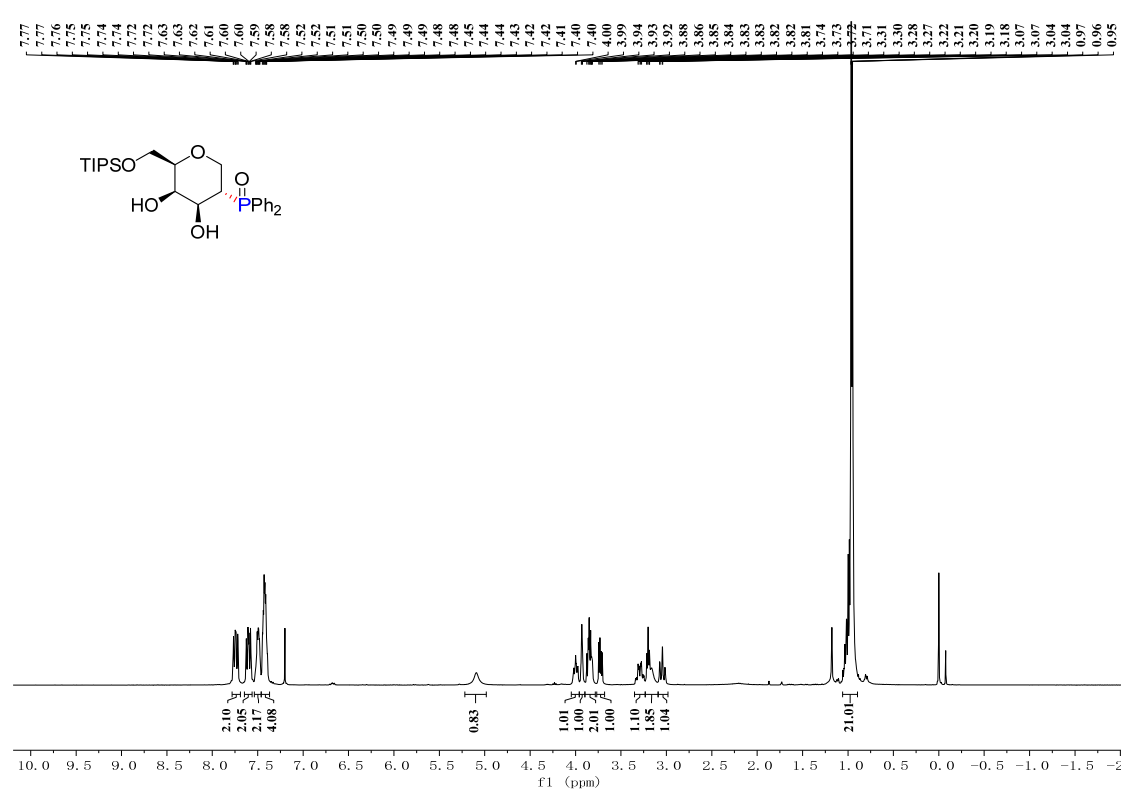



CC(C)(C)OP(=O)(c1ccc(C)cc1)c2c(O)c(O)c(COP(=O)(c3ccc(C)cc3))oc2

<sup>13</sup>C NMR (CDCl<sub>3</sub>) δ (ppm): 131.31, 131.28, 131.06, 130.50, 130.40, 130.06, 129.98, 129.89, 129.26, 128.29, 127.81, 127.78, 127.69, 127.66, 78.13, 68.58, 68.52, 66.69, 66.61, 64.81, 64.76, 61.98, 36.90, 36.21, 16.89, 16.87, 10.76.

<sup>13</sup>C NMR (CDCl<sub>3</sub>) δ (ppm): 131.31, 131.28, 131.06, 130.50, 130.40, 130.06, 129.98, 129.89, 129.26, 128.29, 127.81, 127.78, 127.69, 127.66, 78.13, 68.58, 68.52, 66.69, 66.61, 64.81, 64.76, 61.98, 36.90, 36.21, 16.89, 16.87, 10.76.

Chemical structure of the compound is shown above the spectrum. The structure is a substituted tetrahydropyran derivative, specifically a 2,3,6-tri-O-acetyl-4-O-TIPSO-6-O-TIPSO-2,3,6-tri-O-acetyl-4-O-TIPSO derivative. The structure is a substituted tetrahydropyran derivative, specifically a 2,3,6-tri-O-acetyl-4-O-TIPSO-6-O-TIPSO-2,3,6-tri-O-acetyl-4-O-TIPSO derivative.



**$^1\text{H}$  NMR (CDCl<sub>3</sub>, 400 MHz) of **3r****

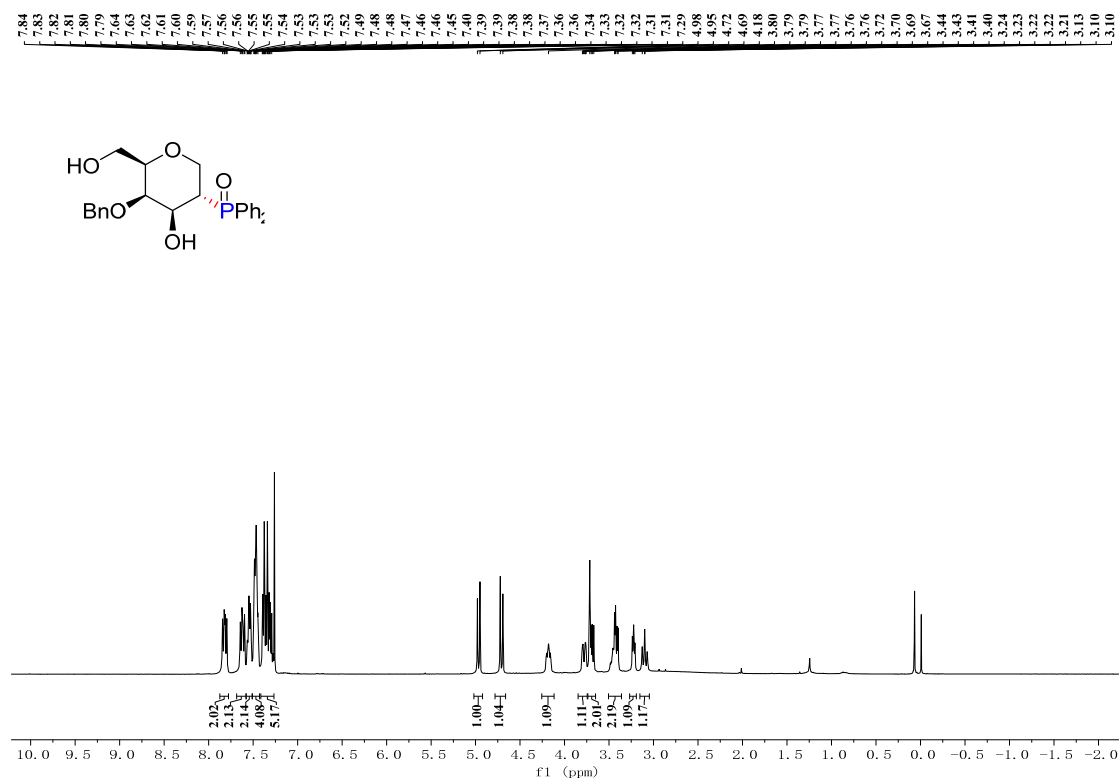

**$^{13}\text{C}$  NMR (CDCl<sub>3</sub>, 100 MHz) of **3r****

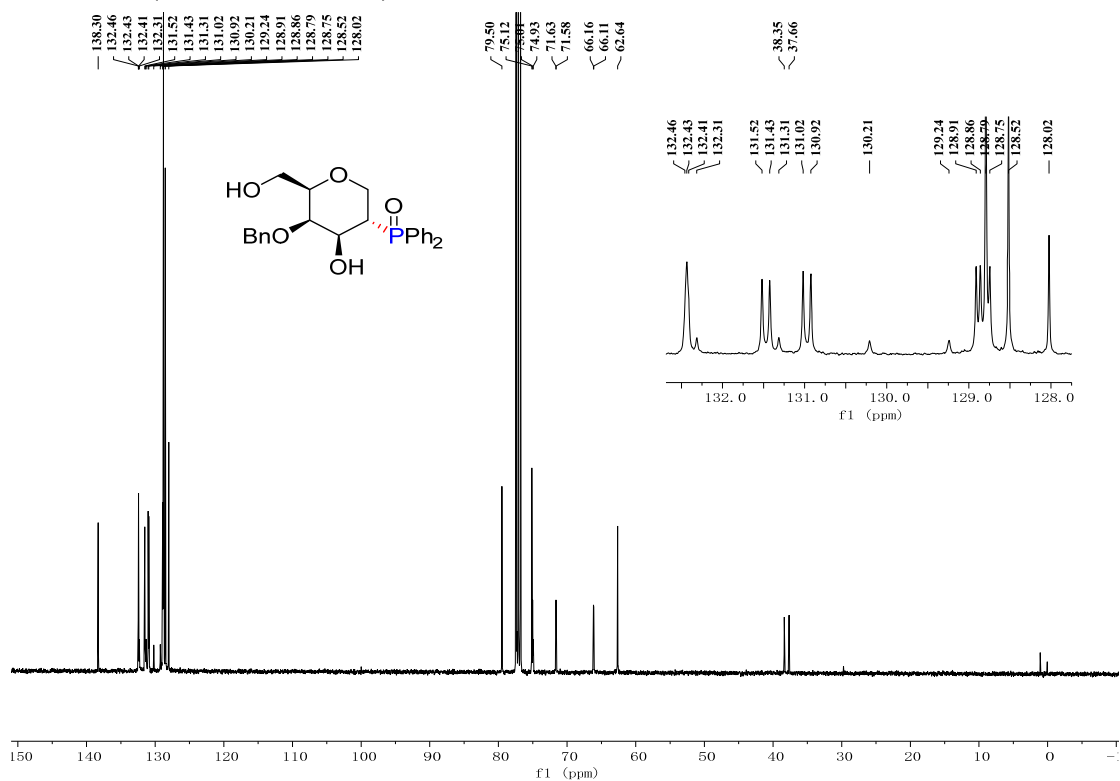



**$^{31}\text{P}$  NMR (CDCl<sub>3</sub>, 162 MHz) of **3r****

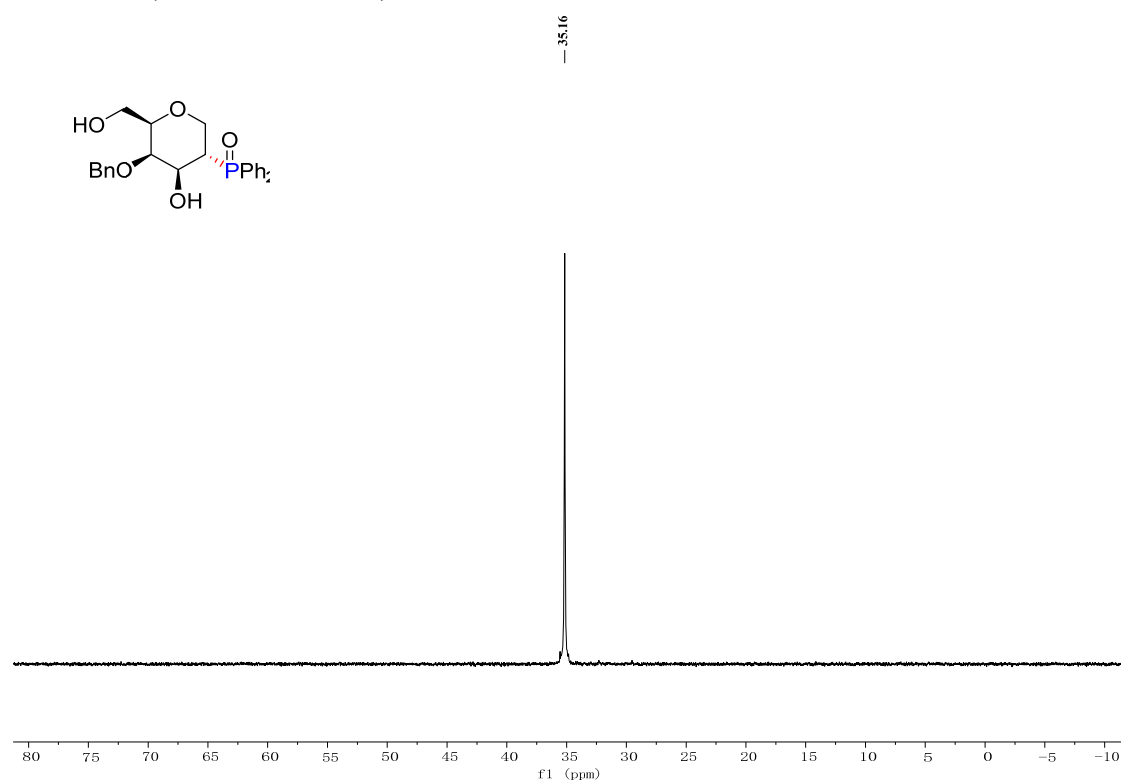

**$^1\text{H}$  NMR (CDCl<sub>3</sub>, 400 MHz) of **3s****

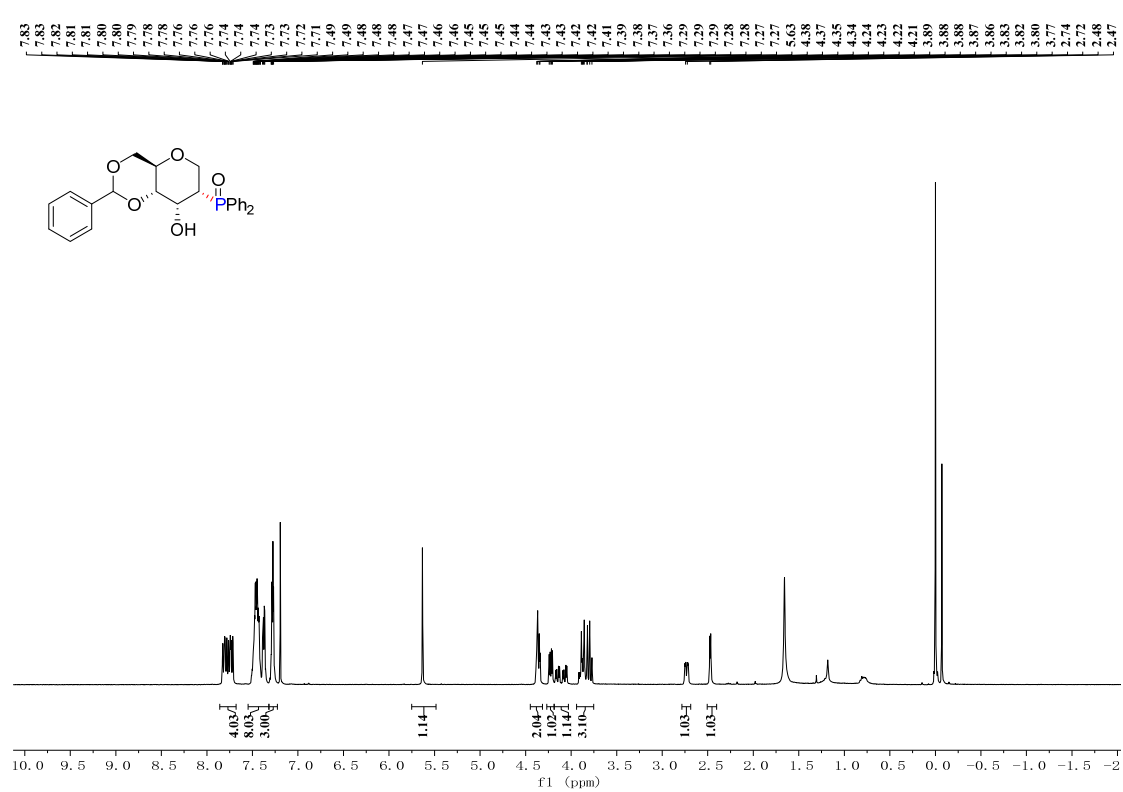



**$^{13}\text{C}$  NMR (CDCl<sub>3</sub>, 100 MHz) of **3s****

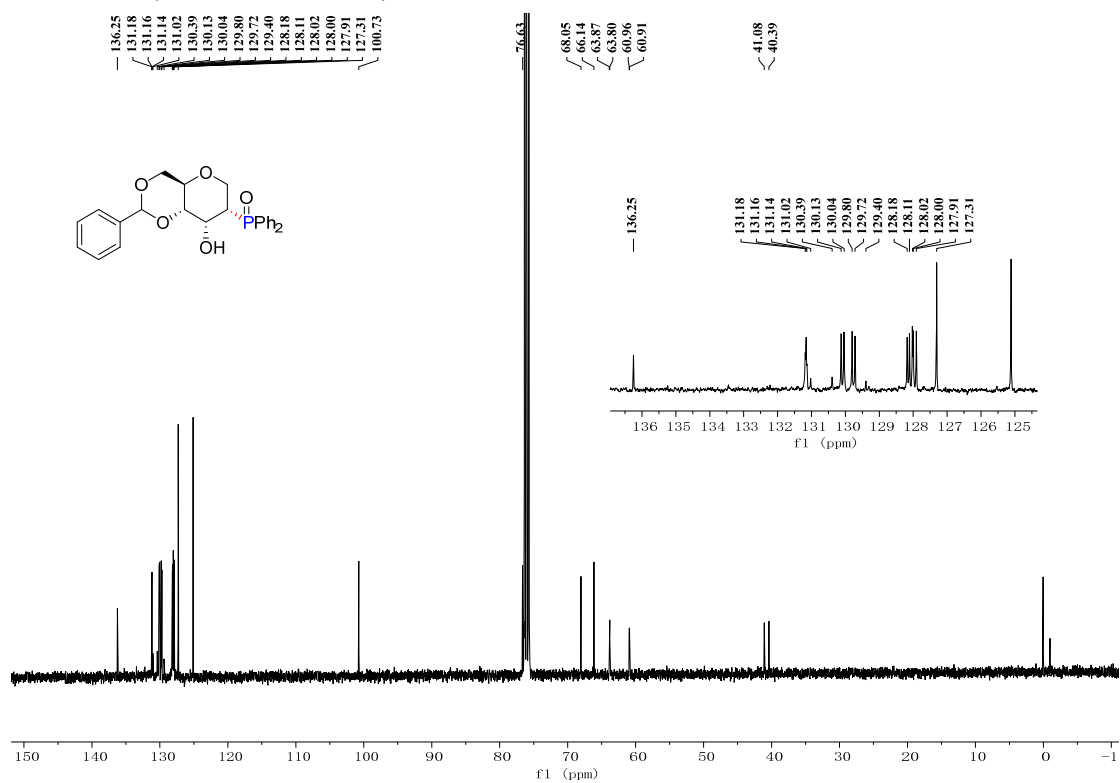

**$^{31}\text{P}$  NMR (CDCl<sub>3</sub>, 162 MHz) of **3s****

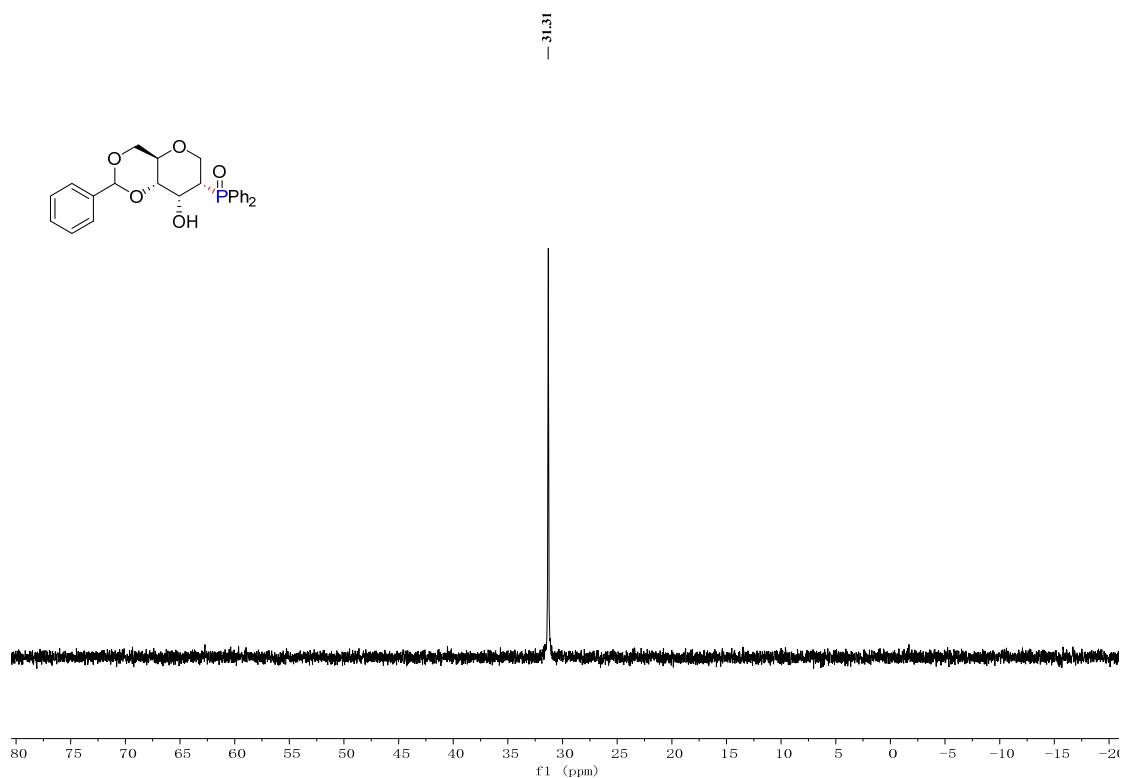



**$^1\text{H}$  NMR (CDCl<sub>3</sub>, 400 MHz) of **3t****

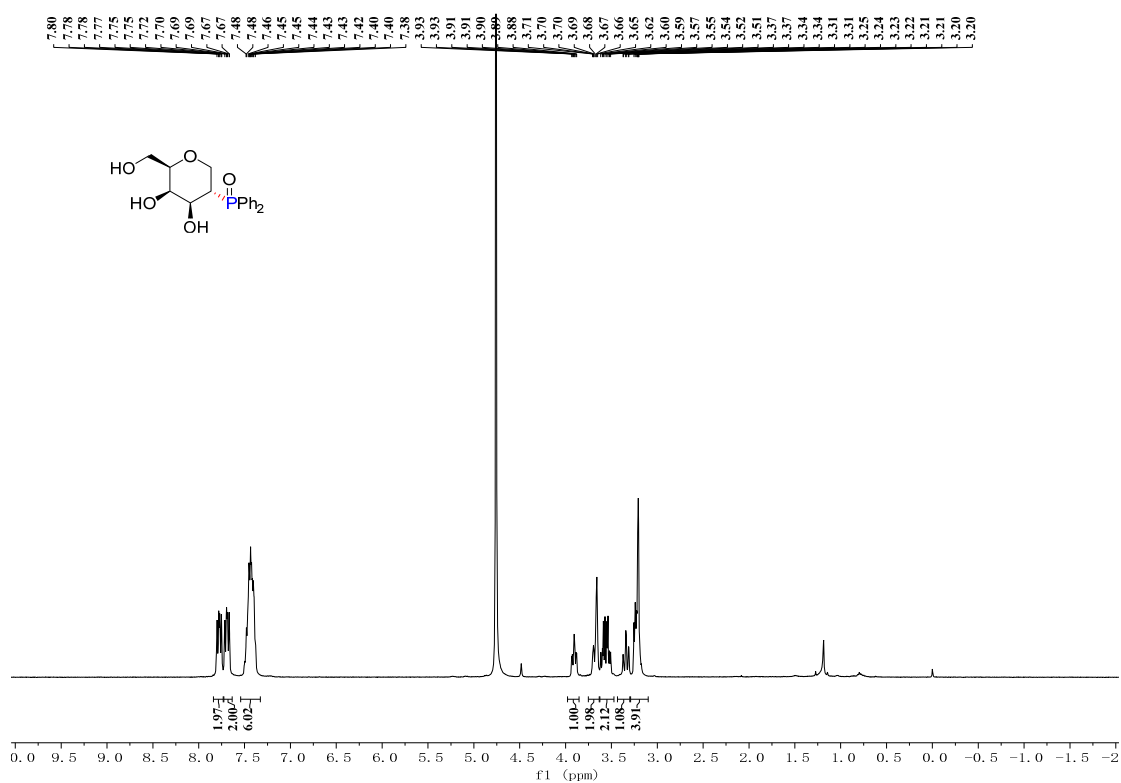

**$^{13}\text{C}$  NMR (CDCl<sub>3</sub>, 100 MHz) of **3t****

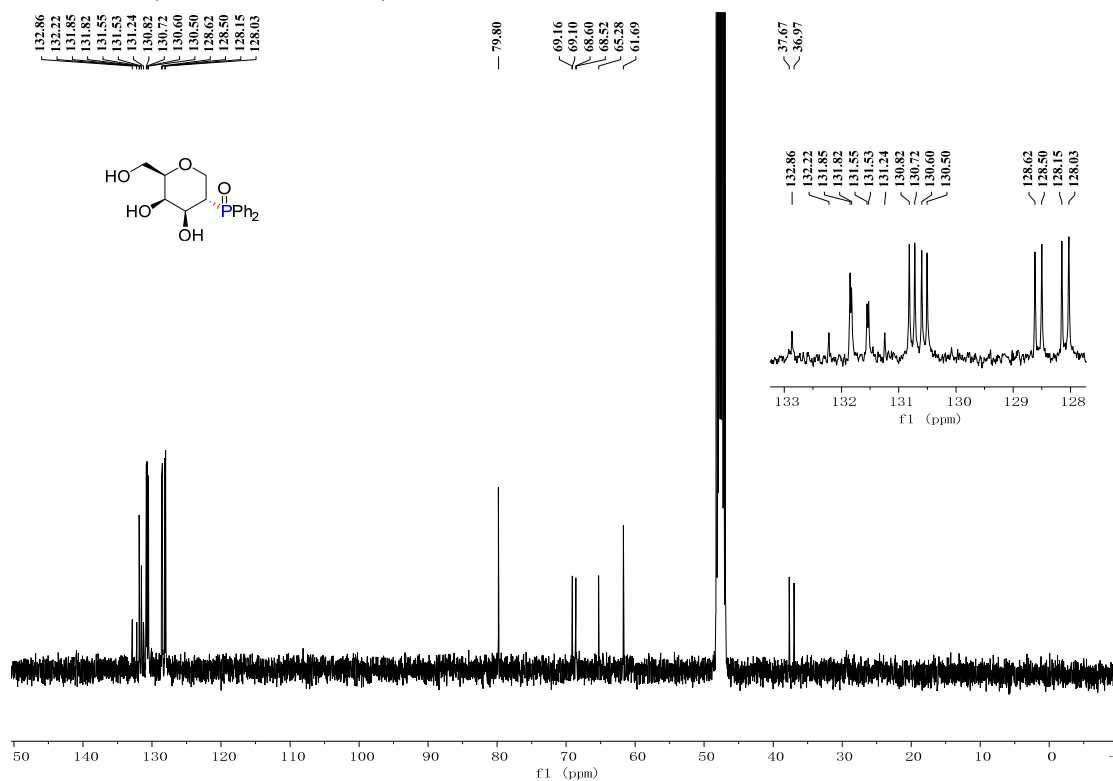



**$^{31}\text{P}$  NMR (CDCl<sub>3</sub>, 162 MHz) of **3t****

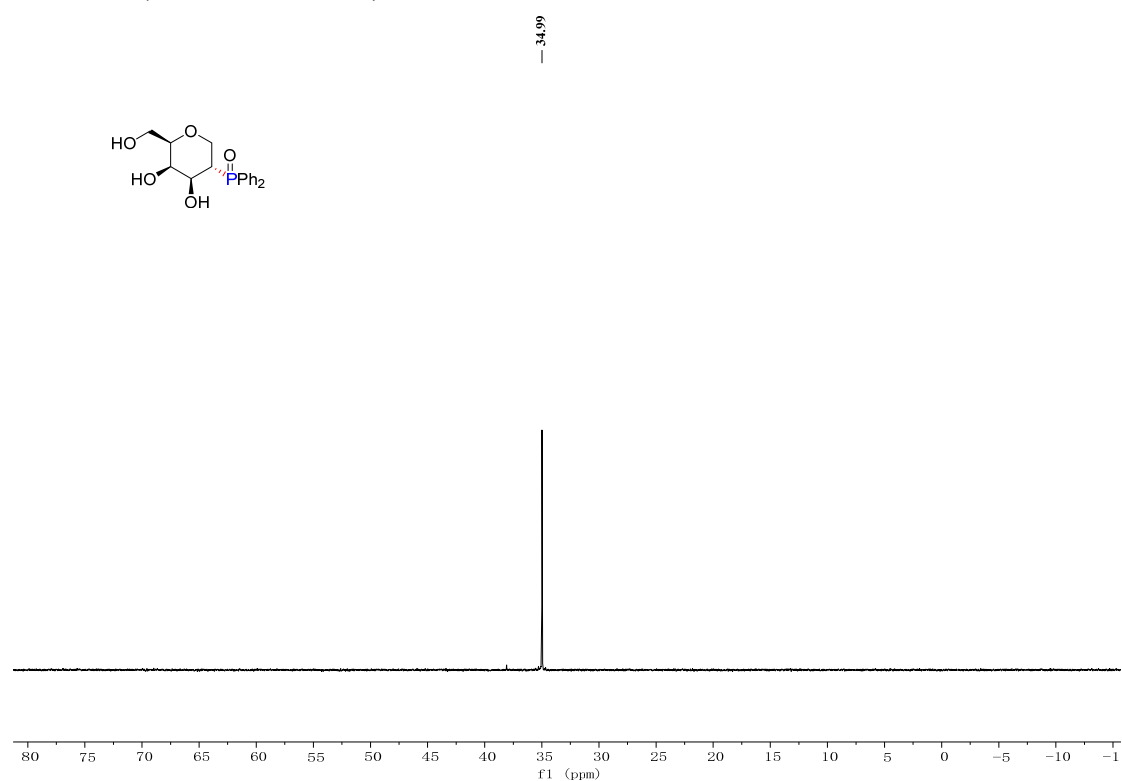

**$^1\text{H}$  NMR (CDCl<sub>3</sub>, 400 MHz) of **3u****

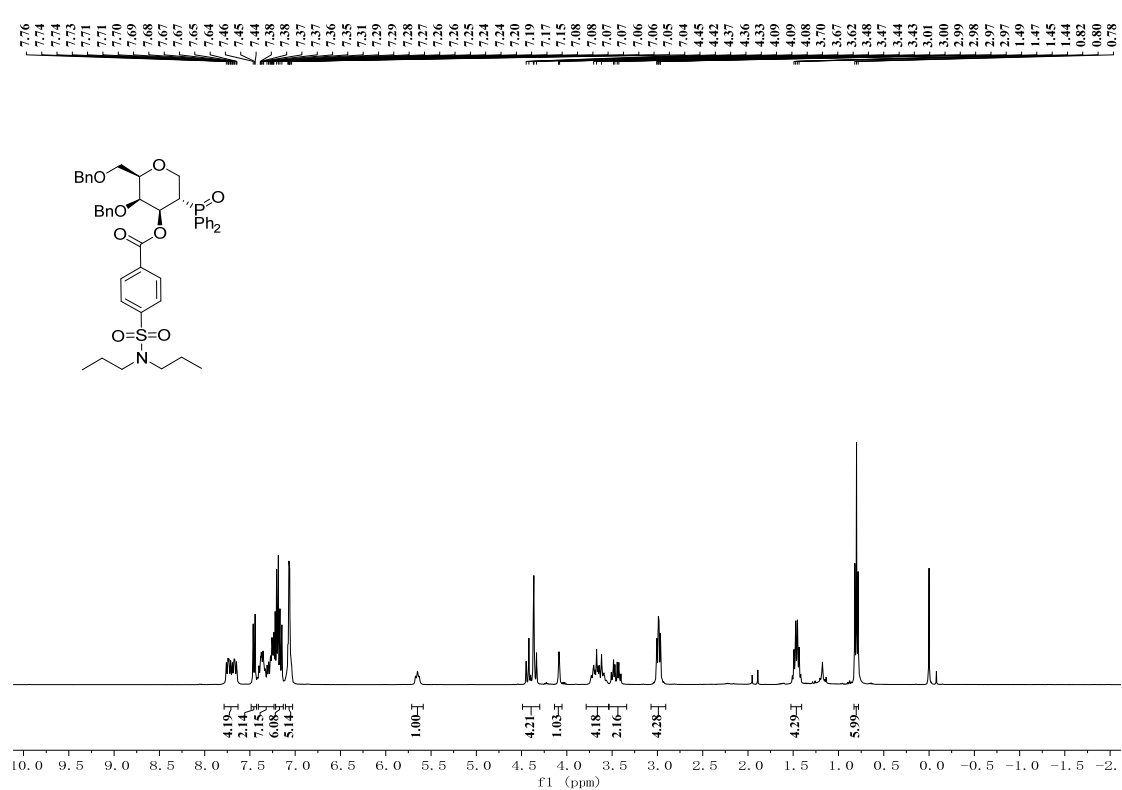



**$^{13}\text{C}$  NMR (CDCl<sub>3</sub>, 100 MHz) of **3u****

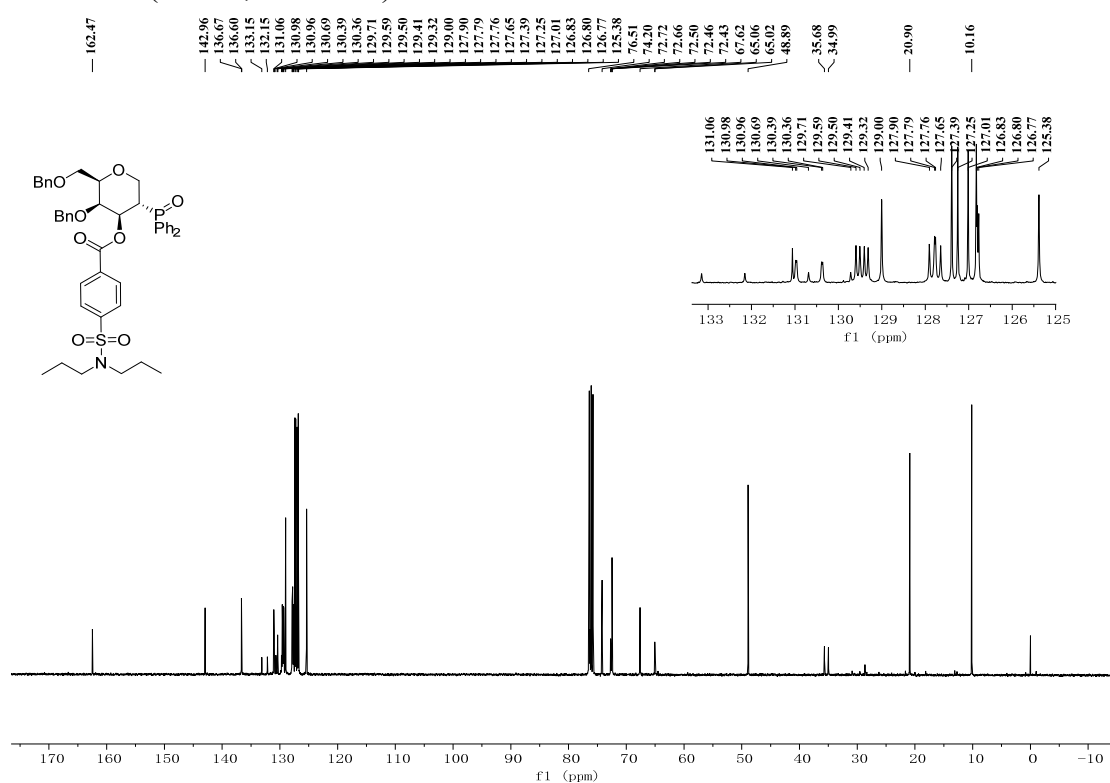

**$^{31}\text{P}$  NMR (CDCl<sub>3</sub>, 162 MHz) of **3u****

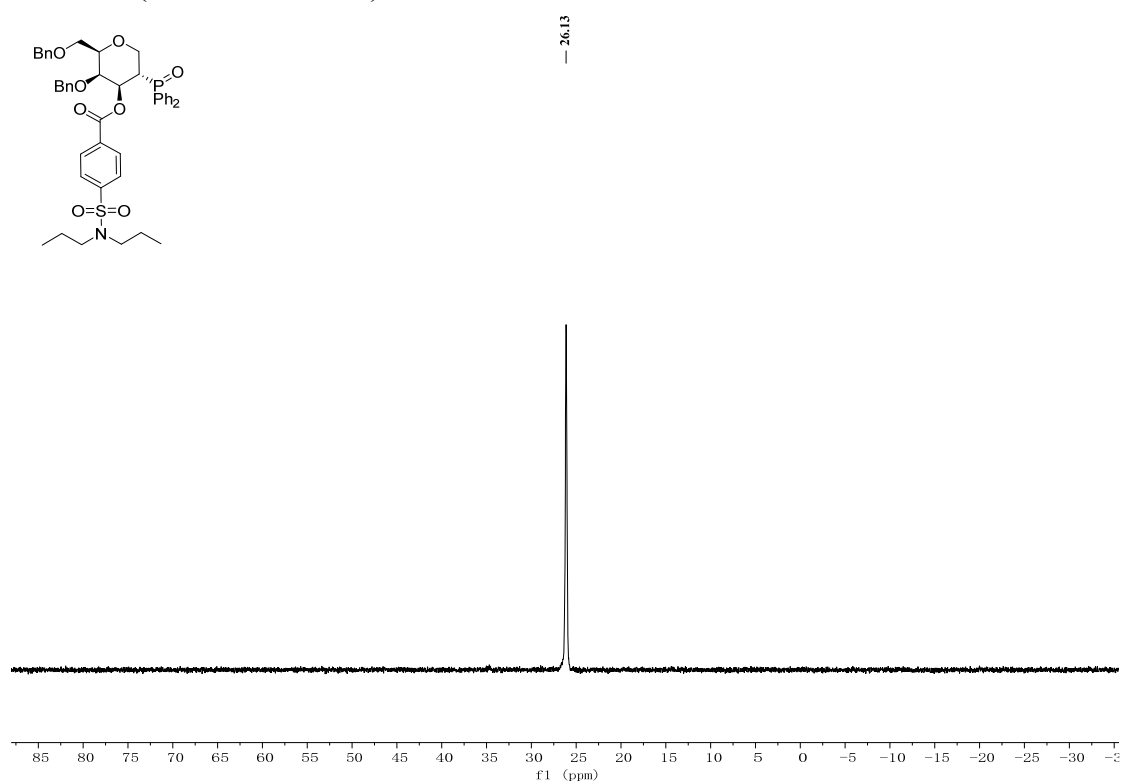



**$^1\text{H}$  NMR ( $\text{CDCl}_3$ , 400 MHz) of **3v****

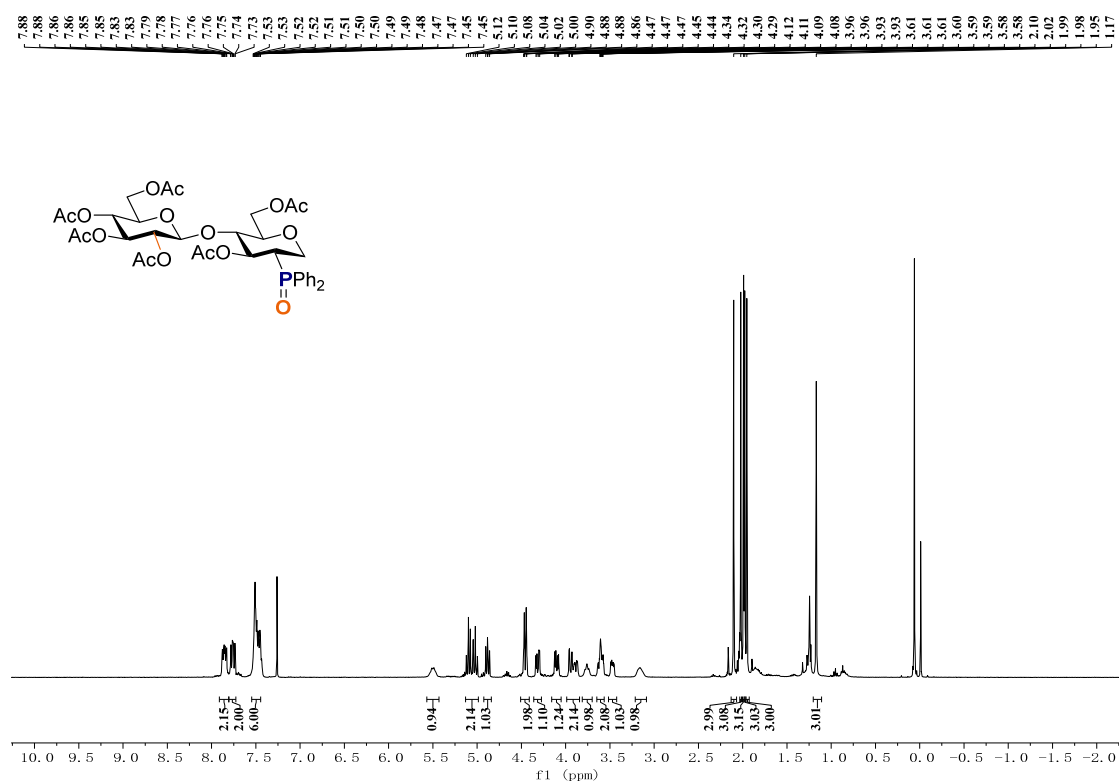

**$^{13}\text{C}$  NMR ( $\text{CDCl}_3$ , 100 MHz) of **3v****

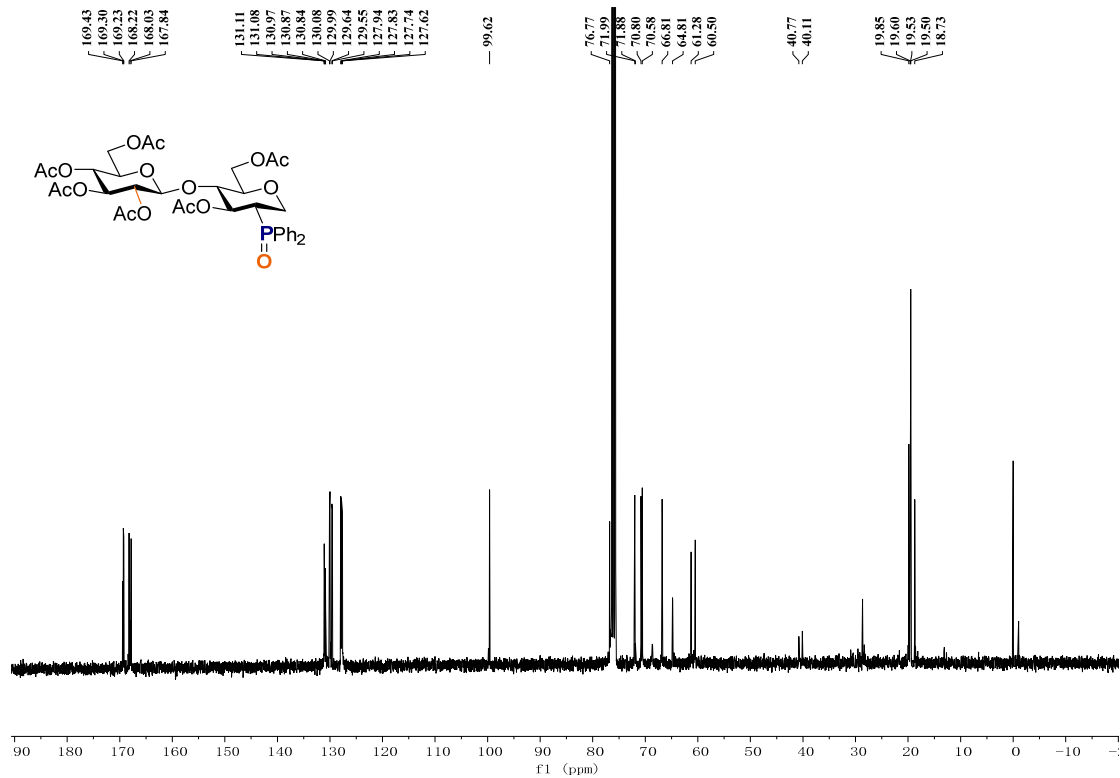



<sup>31</sup>P NMR (CDCl<sub>3</sub>, 162 MHz) of **3v**

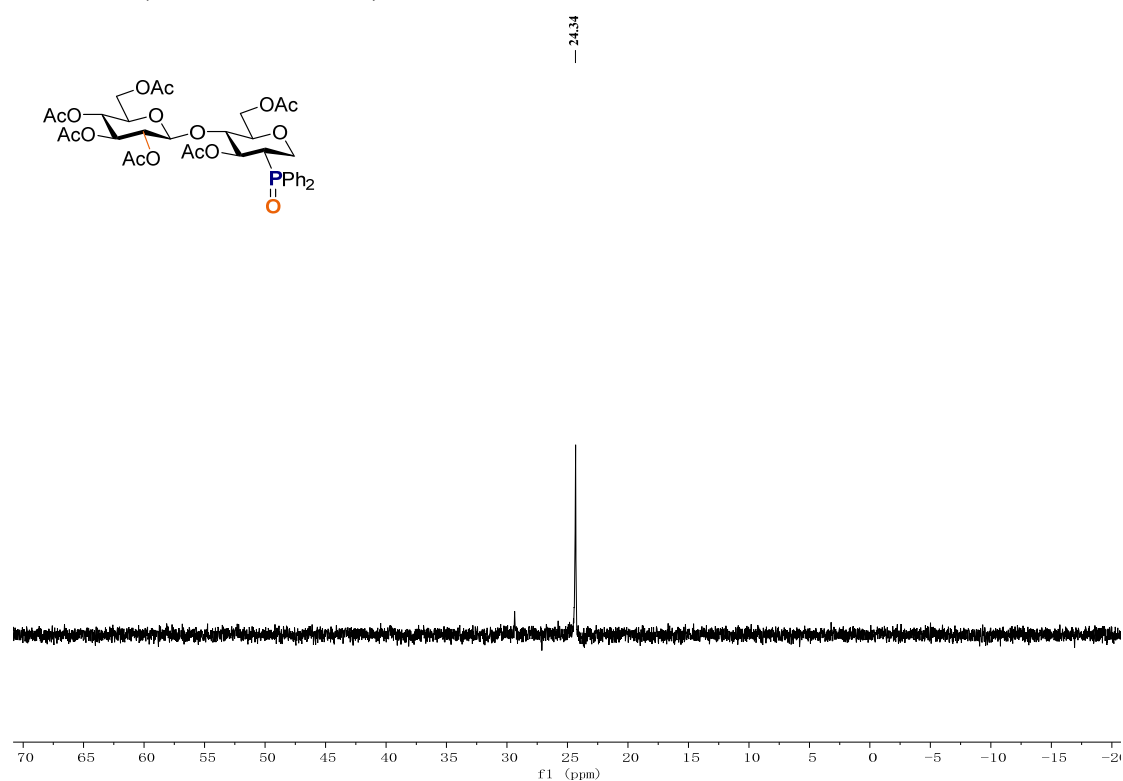

<sup>1</sup>H NMR (CDCl<sub>3</sub>, 400 MHz) of **3v'**

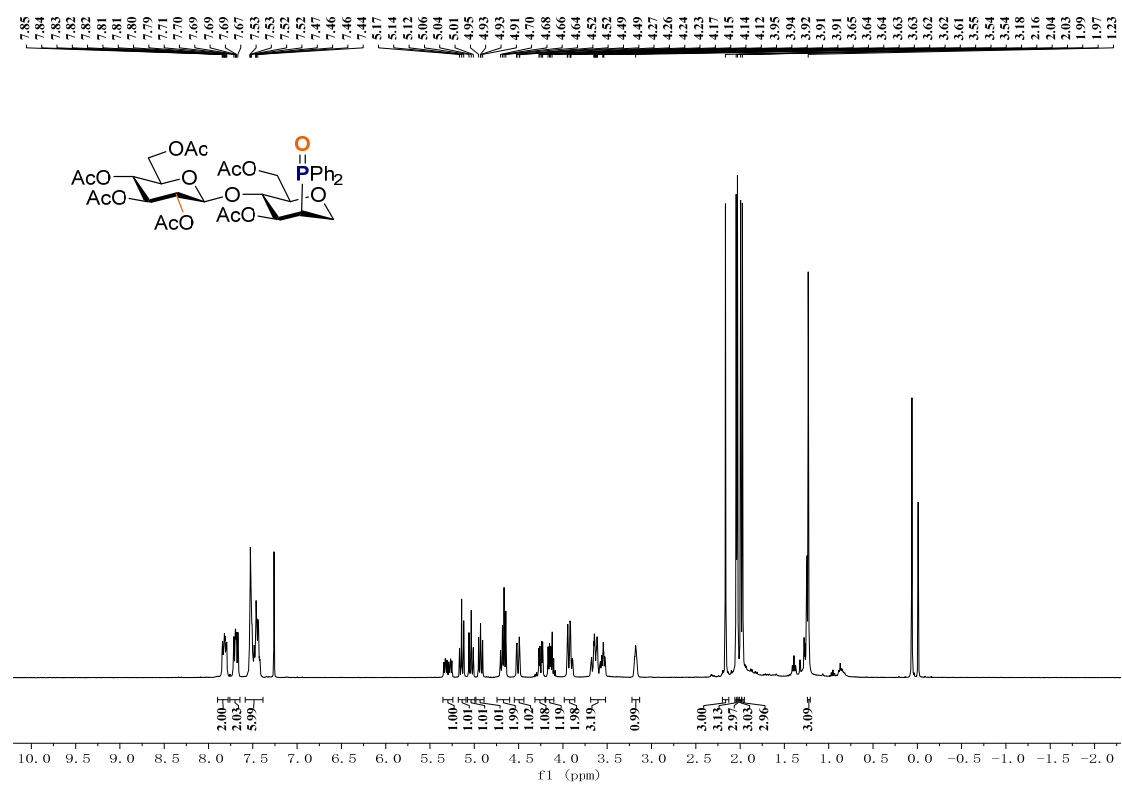



**$^{13}\text{C}$  NMR (CDCl<sub>3</sub>, 100 MHz) of **3v'****

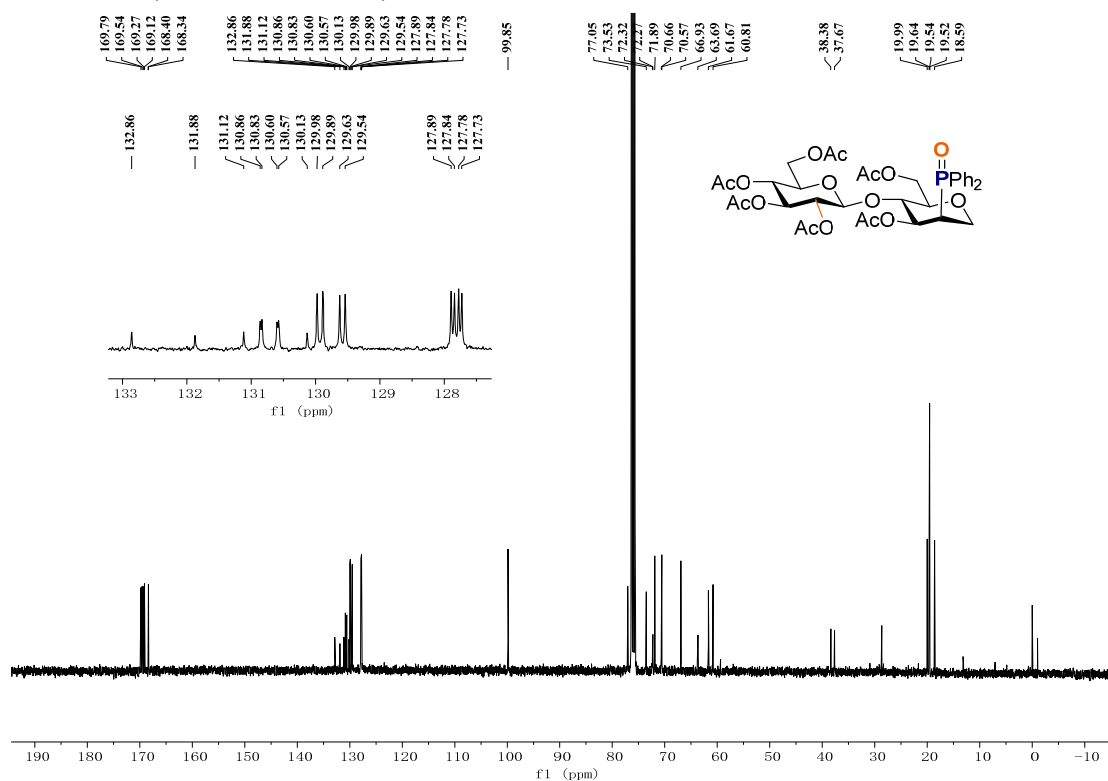

**$^{31}\text{P}$  NMR (CDCl<sub>3</sub>, 162 MHz) of **3v'****

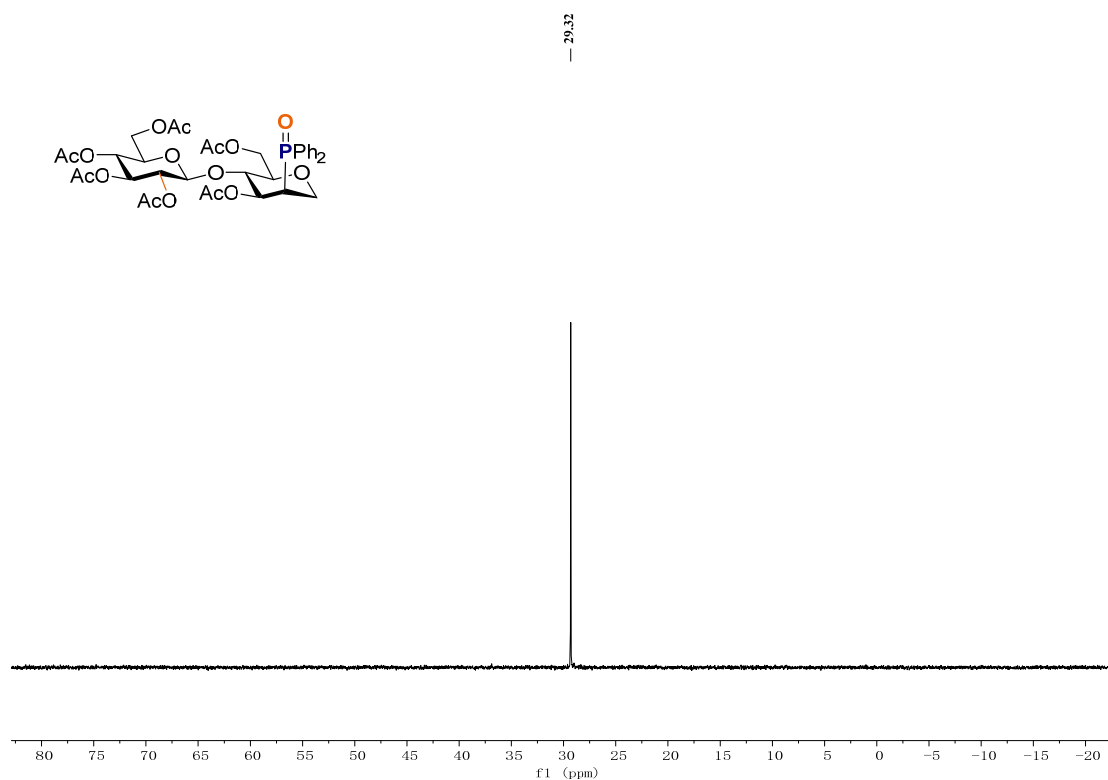



**$^1\text{H}$  NMR (CDCl<sub>3</sub>, 400 MHz) of **3w****

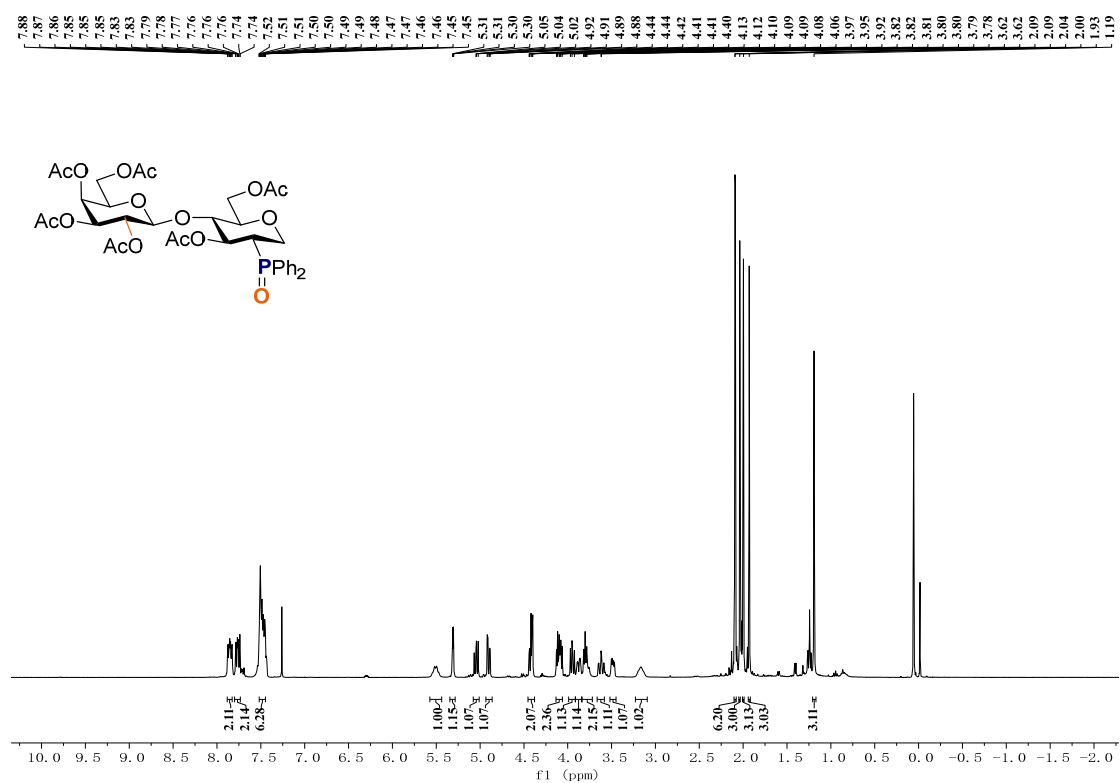

**$^{13}\text{C}$  NMR (CDCl<sub>3</sub>, 100 MHz) of **3w****

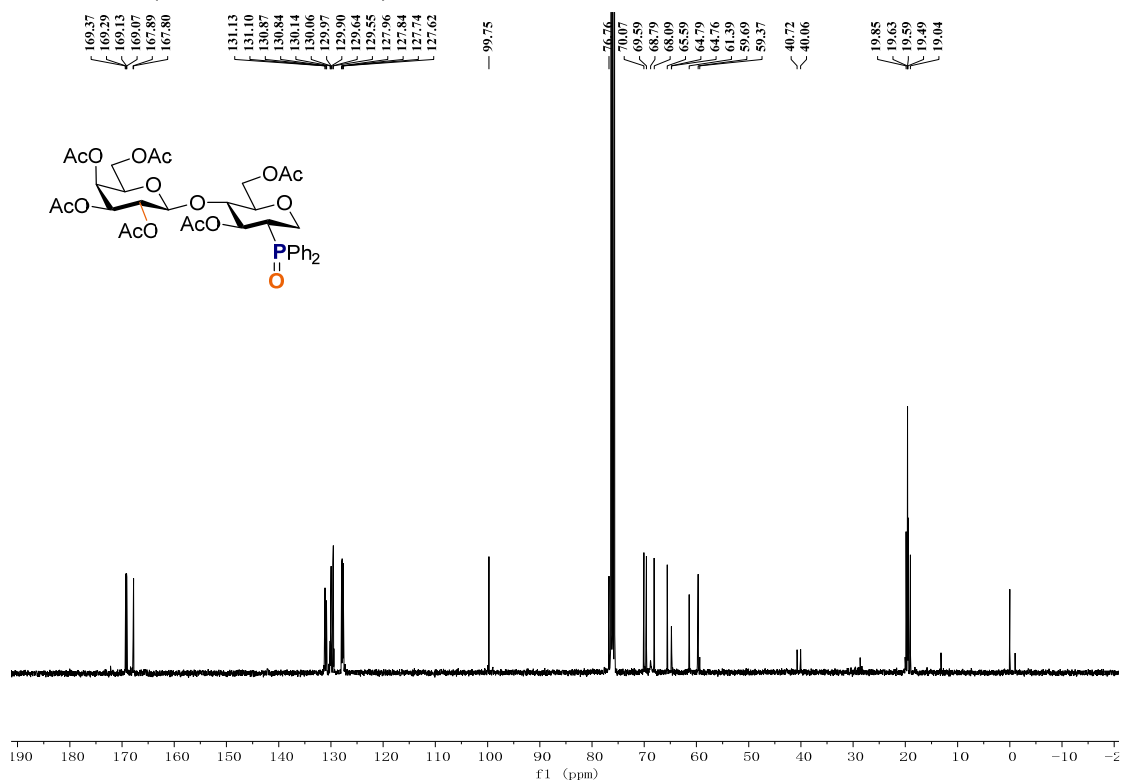



$^{31}\text{P}$ NMR ( $\text{CDCl}_3$ , 162 MHz) of **3w**

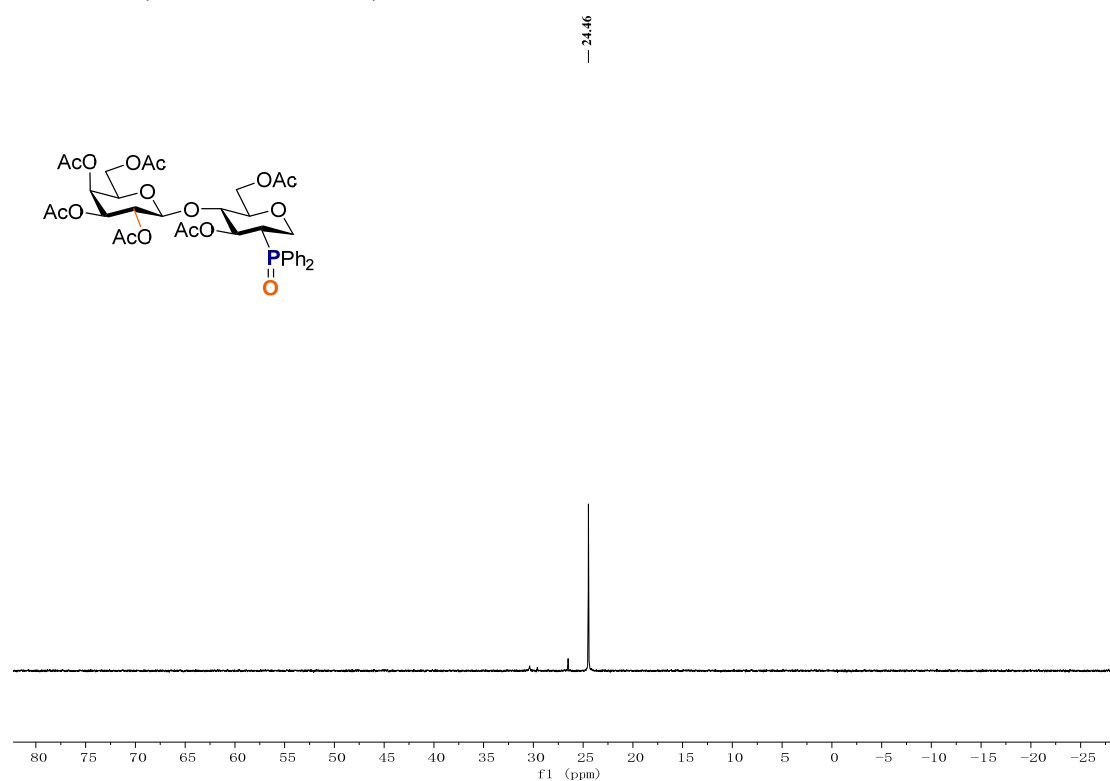

$^1\text{H}$  NMR ( $\text{CDCl}_3$ , 400 MHz) of **3w'**

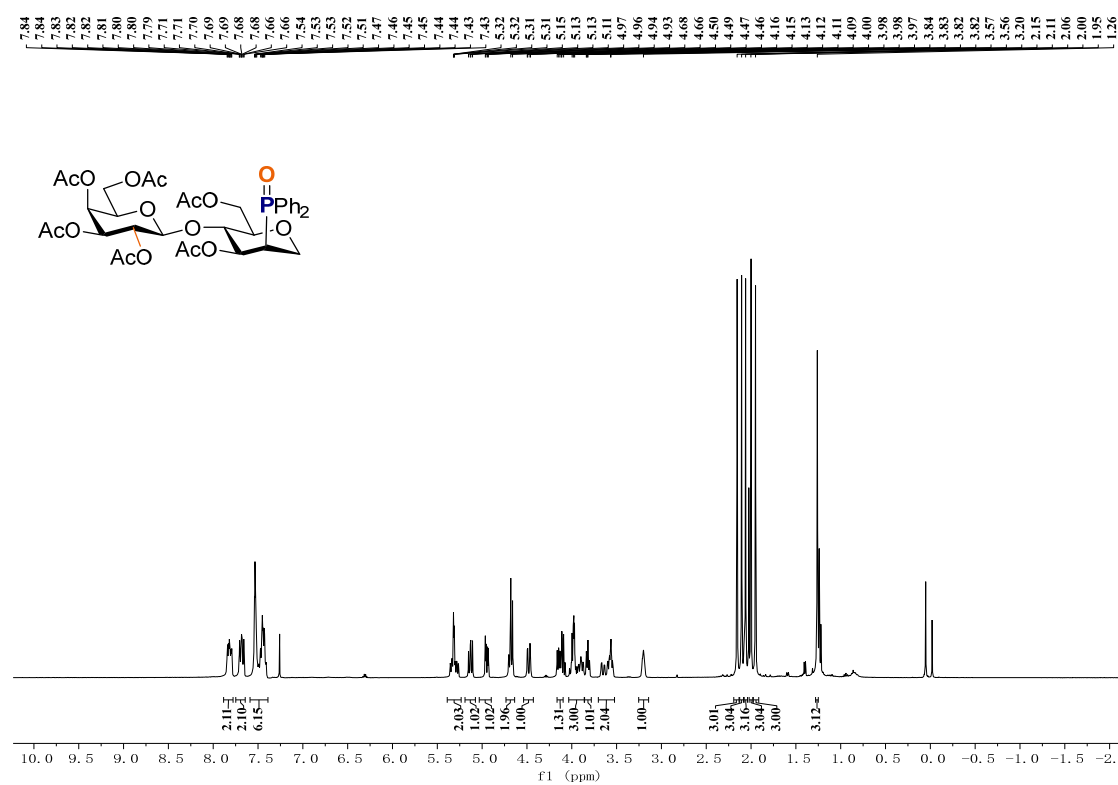



**$^{13}\text{C}$  NMR (CDCl<sub>3</sub>, 100 MHz) of **3w'****

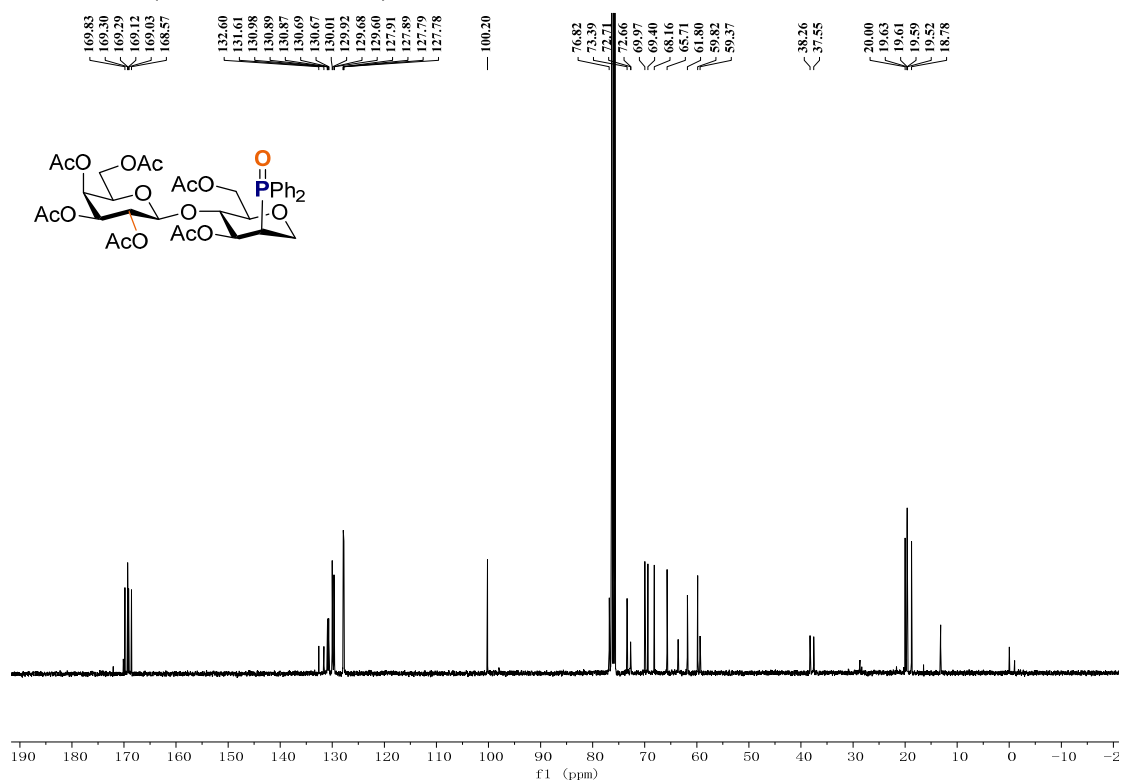

**$^{31}\text{P}$  NMR (CDCl<sub>3</sub>, 162 MHz) of **3w'****

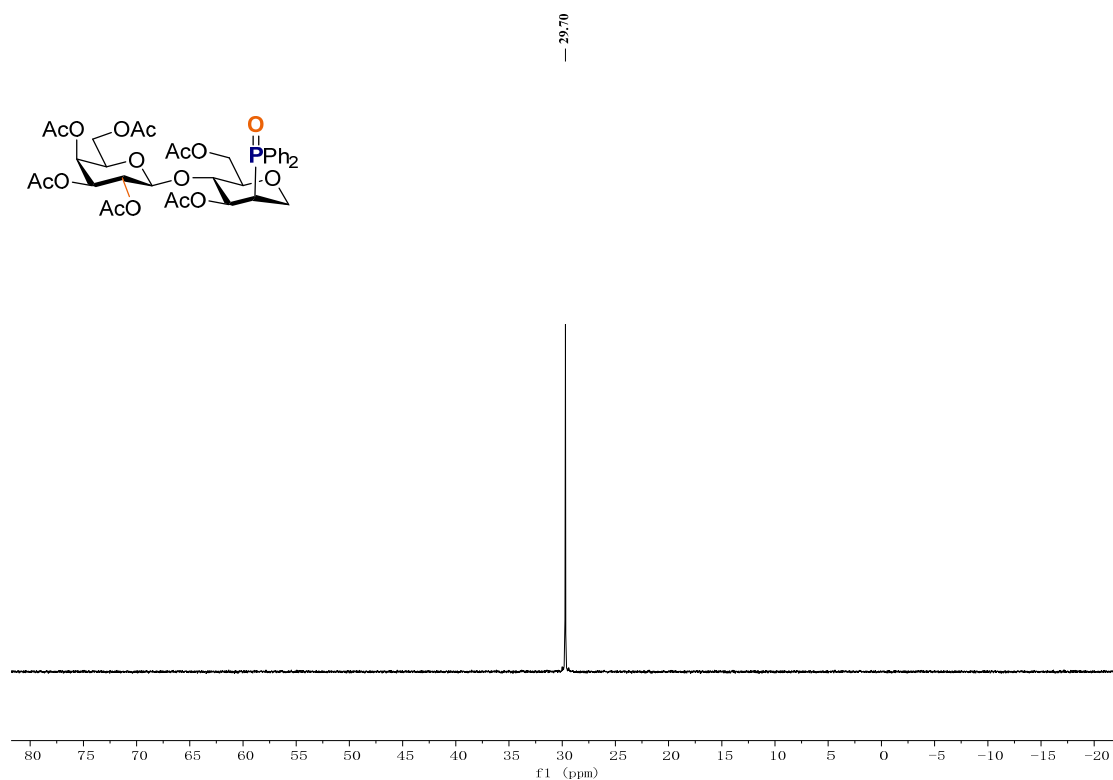



Chemical structure of compound 10: COc1ccc(cc1)C(=O)N2C(OC(=O)c3ccc(C)cc3)C(OC(=O)c4ccc(C)cc4)C(OC(=O)c5ccc(C)cc5)CO2

<sup>1</sup>H NMR spectrum (CDCl<sub>3</sub>) of compound 10. The x-axis represents the chemical shift in ppm, ranging from -1.5 to 9.5. The spectrum shows several peaks, with a prominent solvent peak at 7.26 ppm. Integration values are provided below the baseline: 1.99, 2.17, 17.18, 1.96, 1.00, 1.03, 3.94, 1.00, 1.00, 1.96, 1.97, and 5.97.

Chemical structure of compound 10: COc1ccc(cc1)C(=O)O[C@H]2C[C@@H](COc3ccc(cc3)OC(=O)c4ccc(cc4)OC)c(O)O2

<sup>1</sup>H NMR spectrum (CDCl<sub>3</sub>) of compound 10. The x-axis represents the chemical shift in ppm, ranging from 0 to 16.0. The spectrum shows several peaks corresponding to the structure of compound 10. The peaks are labeled with their chemical shifts (ppm) and integration values.

| Chemical Shift (ppm) | Integration |
|----------------------|-------------|
| 7.901                | 0.10        |
| 7.896                | 0.10        |
| 7.84                 | 0.10        |
| 7.80                 | 0.10        |
| 7.54                 | 0.10        |
| 7.219                | 0.10        |
| 7.14                 | 0.10        |
| 7.144                | 0.10        |
| 6.933                | 0.10        |
| 6.628                | 0.10        |
| 6.625                | 0.10        |
| 3.767                | 0.10        |
| 3.695                | 0.10        |
| 2.154                | 0.10        |



**$^{31}\text{P}$  NMR ( $\text{CDCl}_3$ , 162 MHz) of **4a****

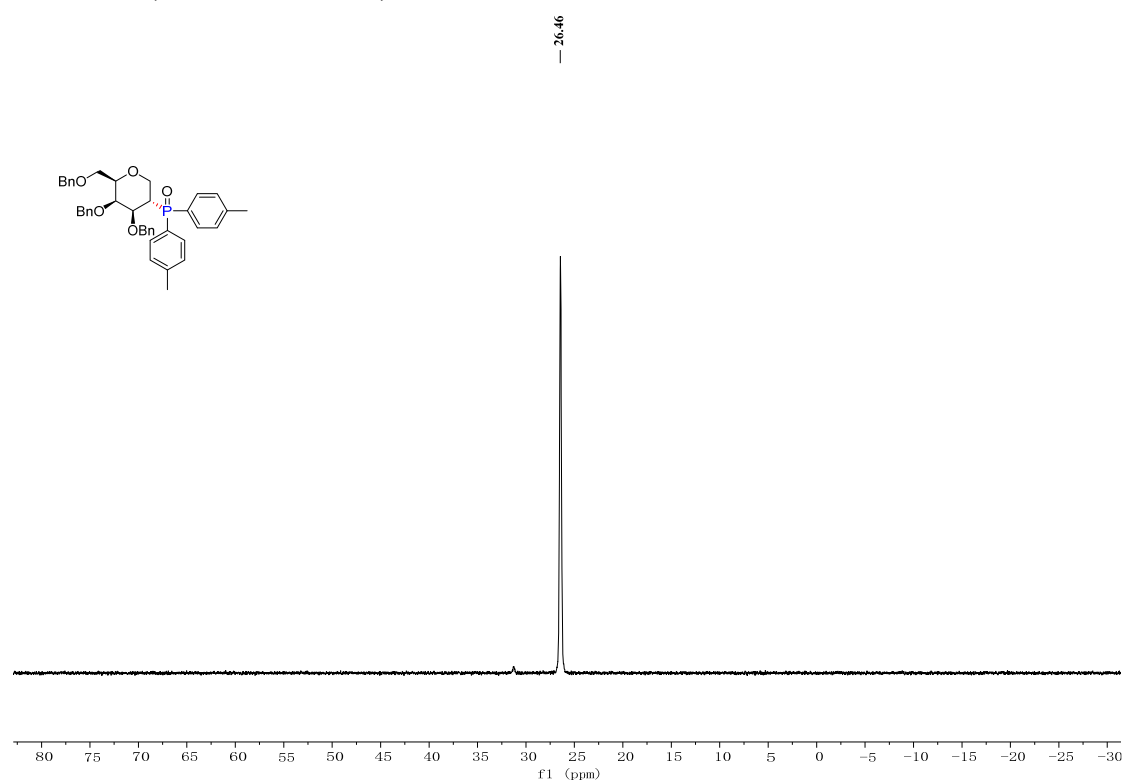

**$^1\text{H}$  NMR ( $\text{CDCl}_3$ , 400 MHz) of **4b****

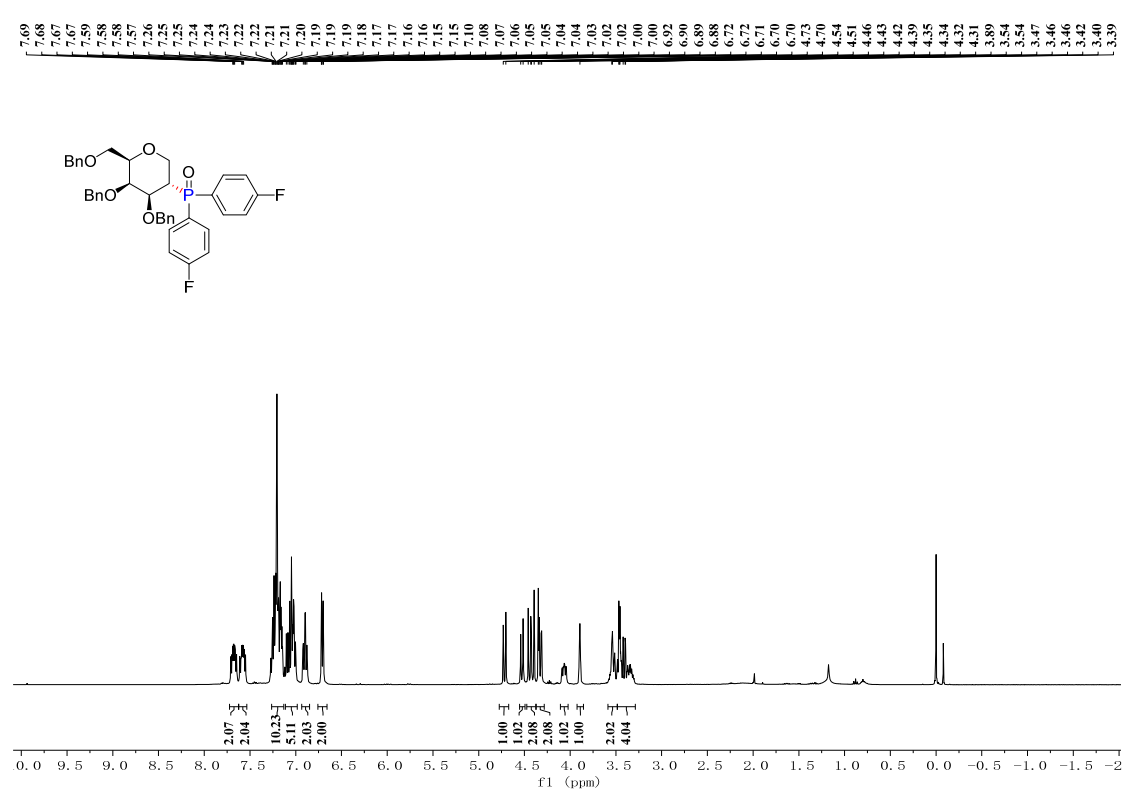



**$^{13}\text{C}$  NMR (CDCl<sub>3</sub>, 100 MHz) of **4b****

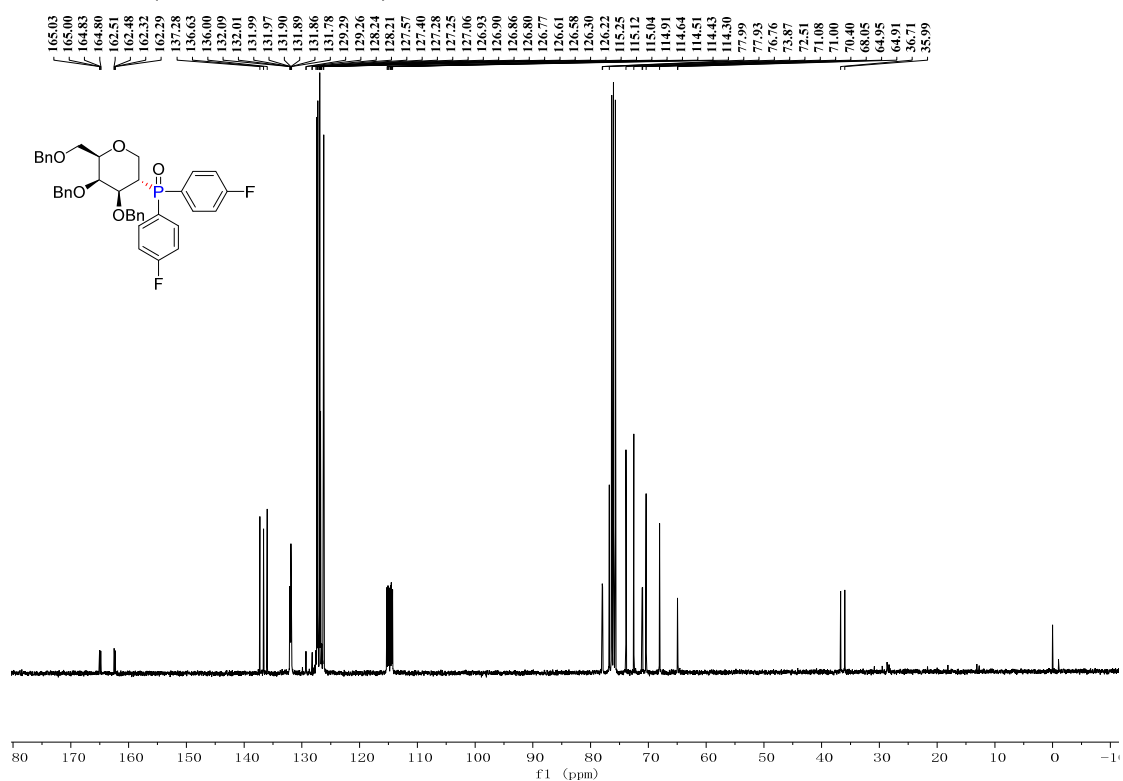

**$^{31}\text{P}$  NMR (CDCl<sub>3</sub>, 162 MHz) of **4b****

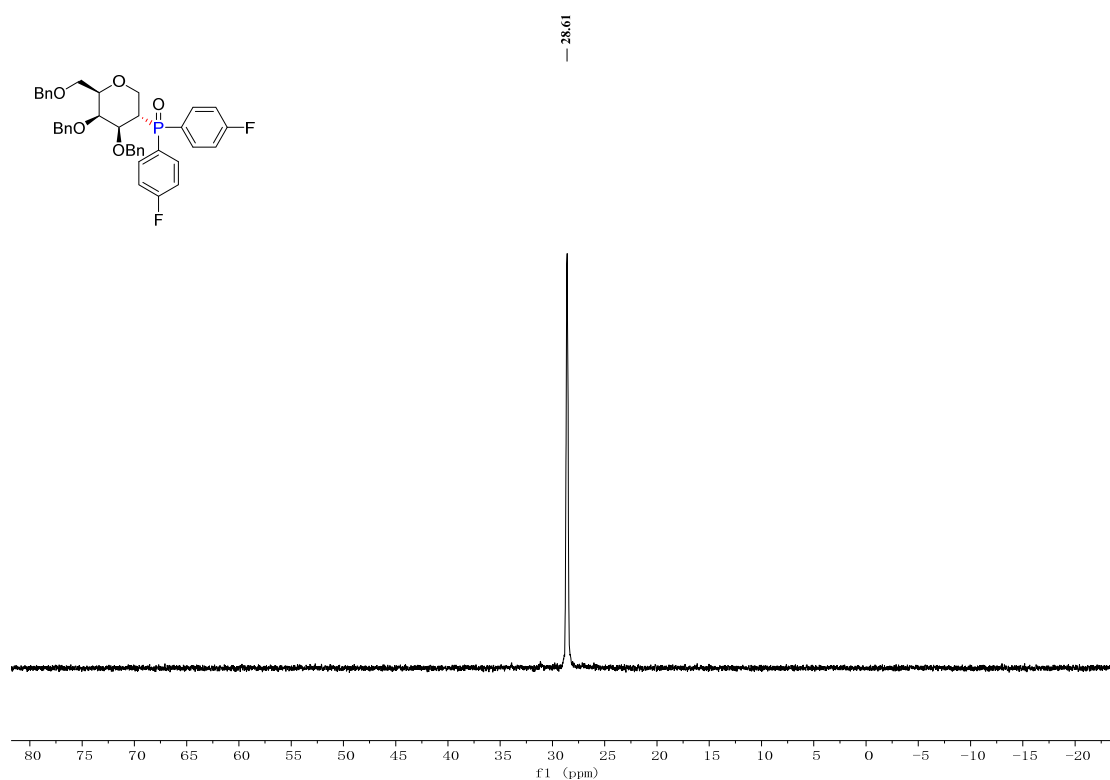



**$^{19}\text{F}$  NMR (CDCl<sub>3</sub>, 101 MHz) of **4b****

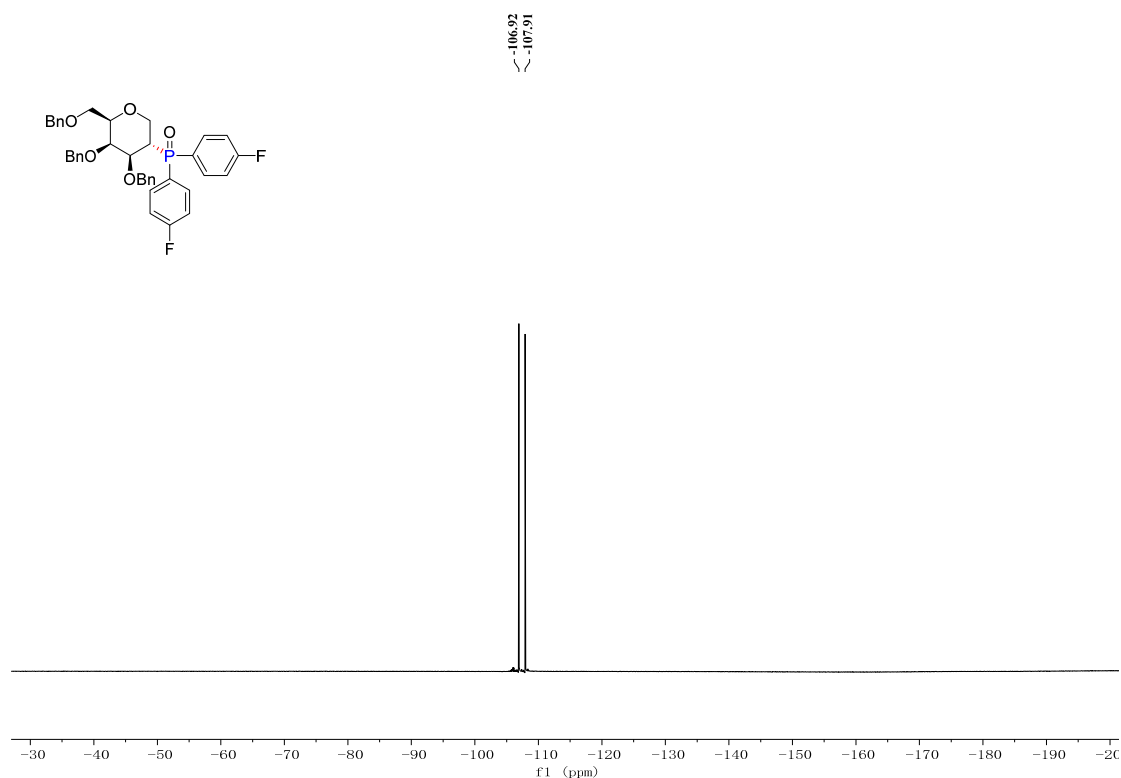

**$^1\text{H}$  NMR (CDCl<sub>3</sub>, 400 MHz) of **4c****

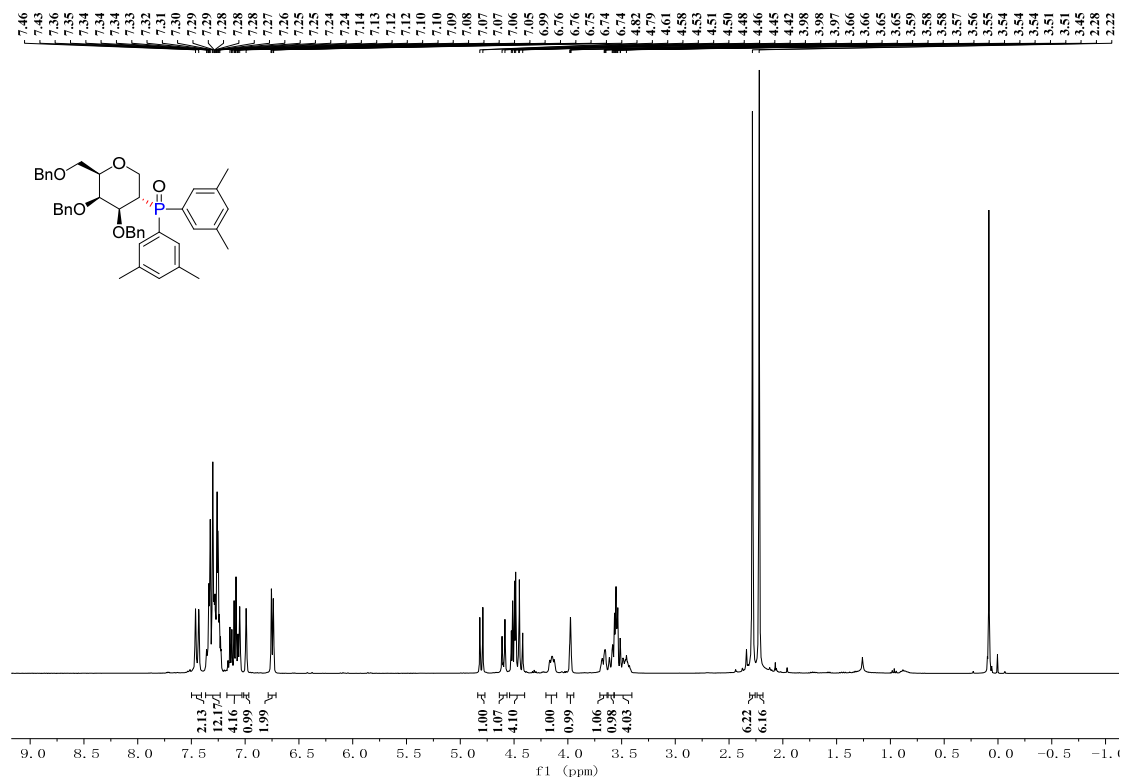



**$^{13}\text{C}$  NMR (CDCl<sub>3</sub>, 100 MHz) of **4c****

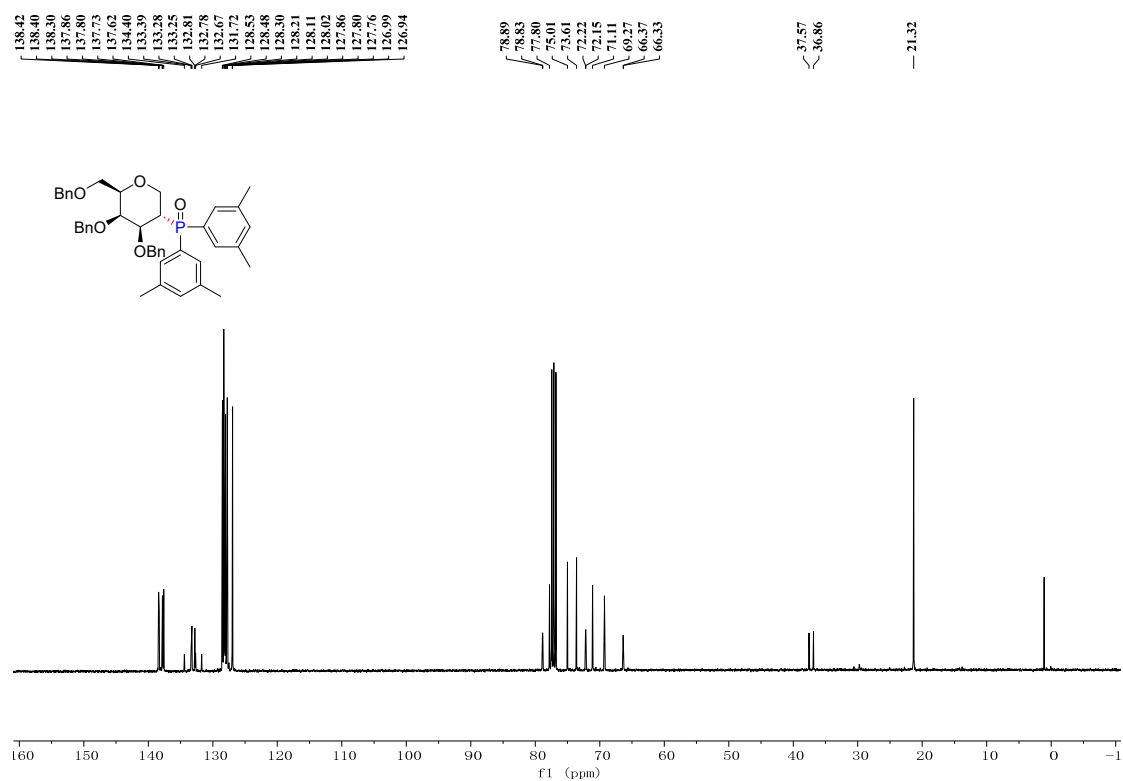



**$^{31}\text{P}$  NMR (CDCl<sub>3</sub>, 162 MHz) of **4c****

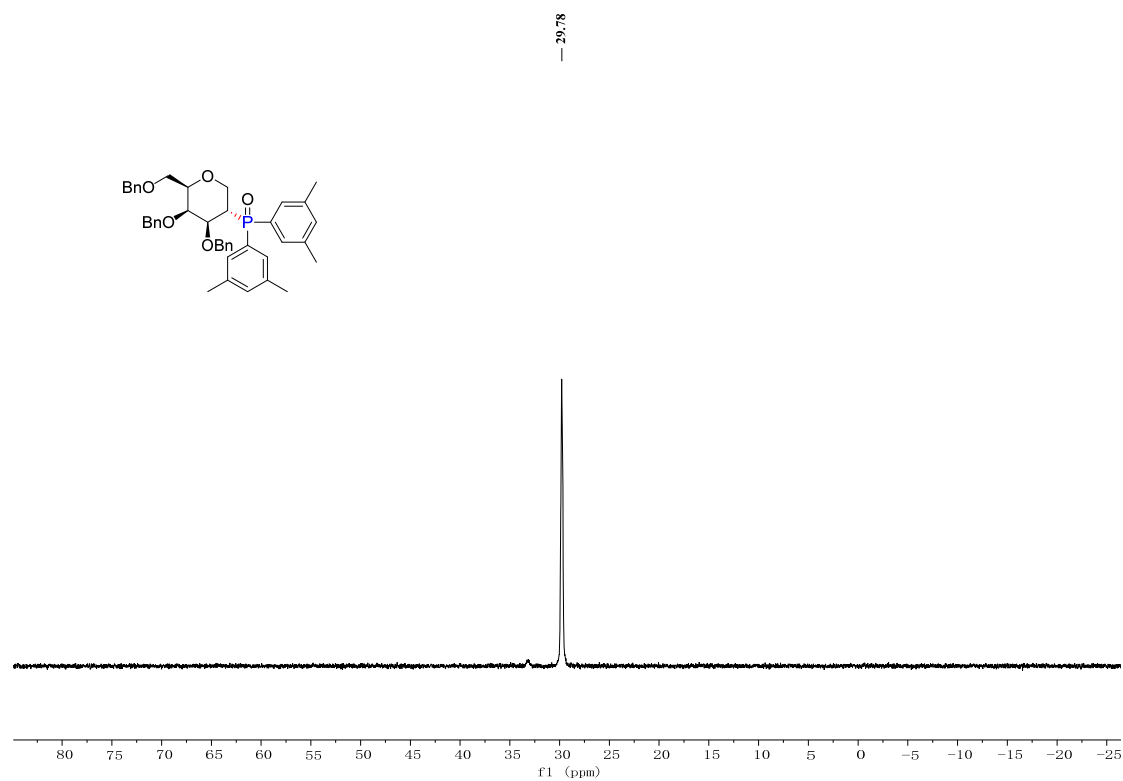

**$^1\text{H}$  NMR (CDCl<sub>3</sub>, 400 MHz) of **4d****

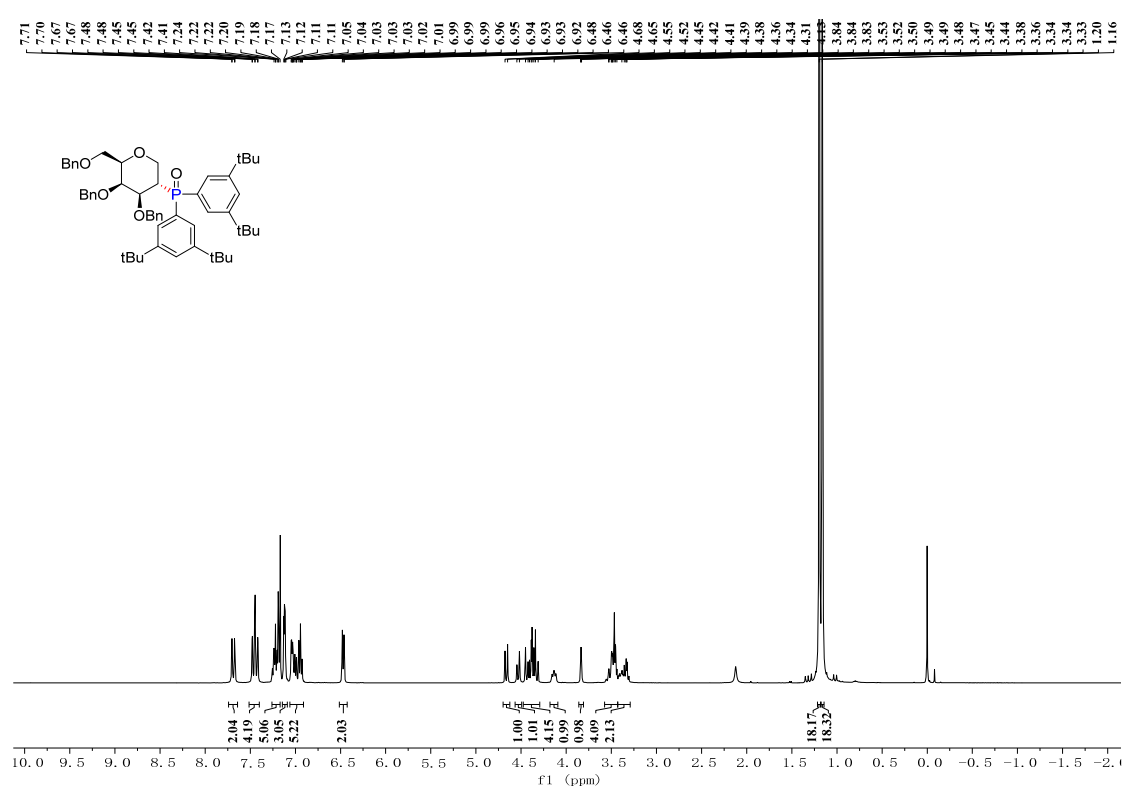

**$^{13}\text{C}$  NMR (CDCl<sub>3</sub>, 100 MHz) of **4d****



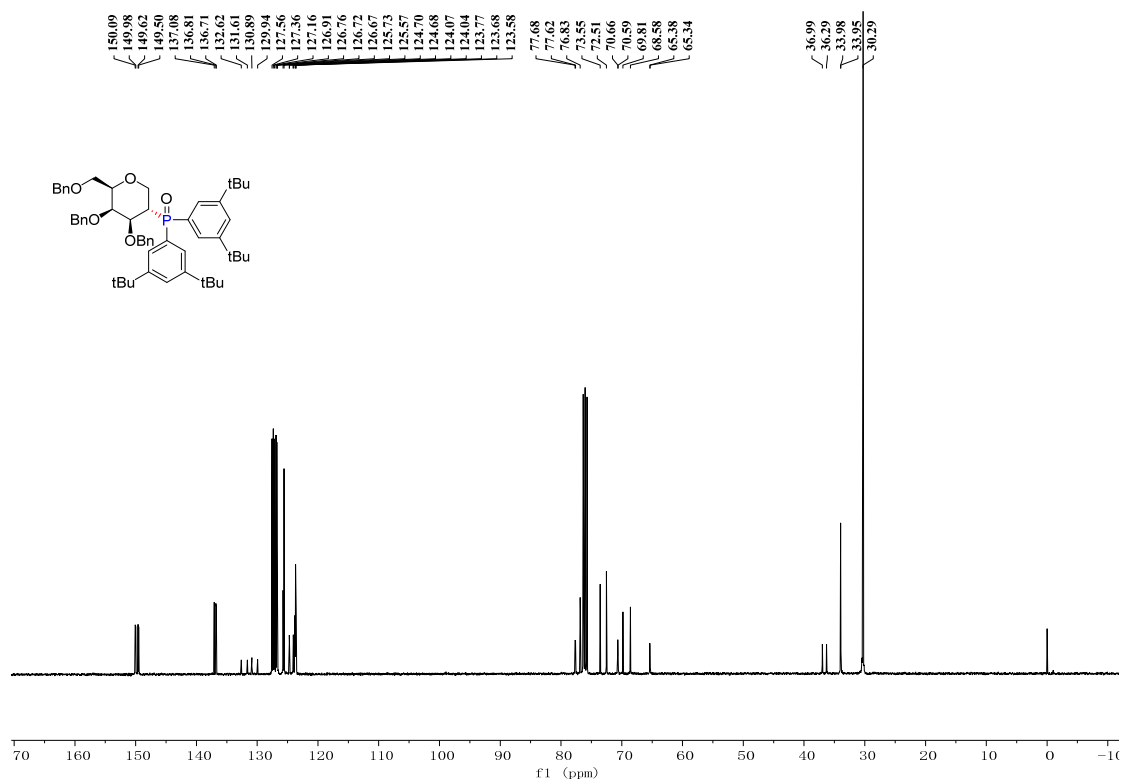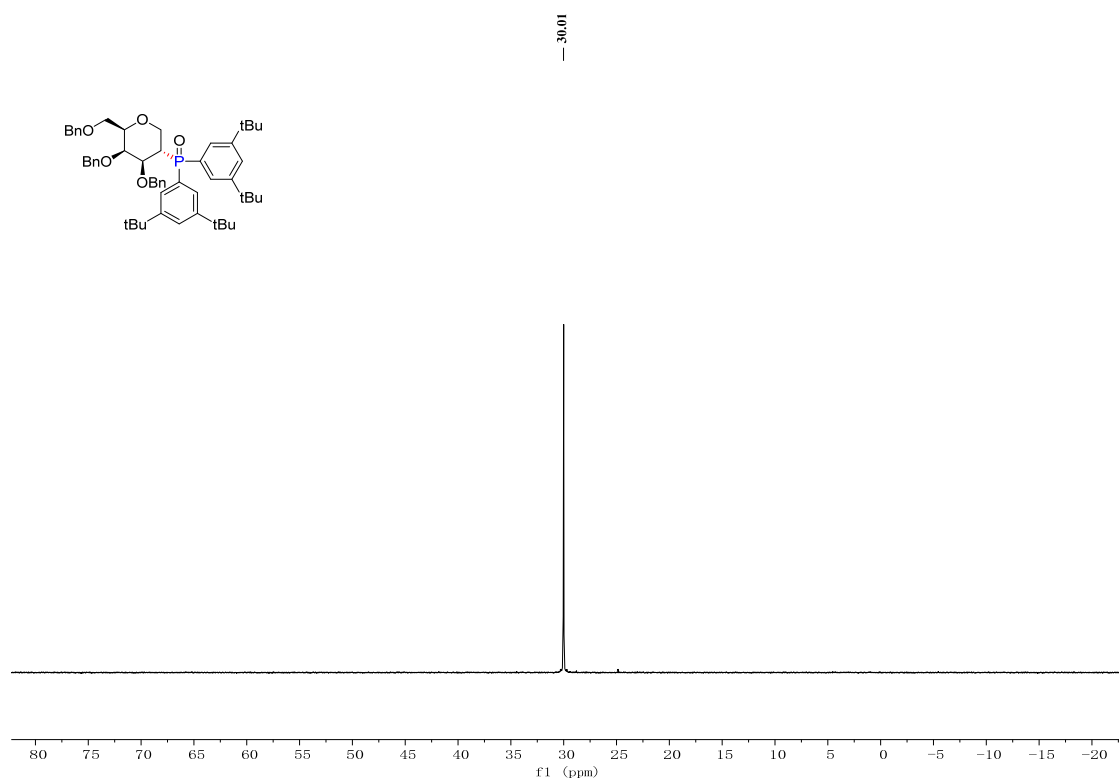



**$^1\text{H}$  NMR (CDCl<sub>3</sub>, 400 MHz) of 4e**

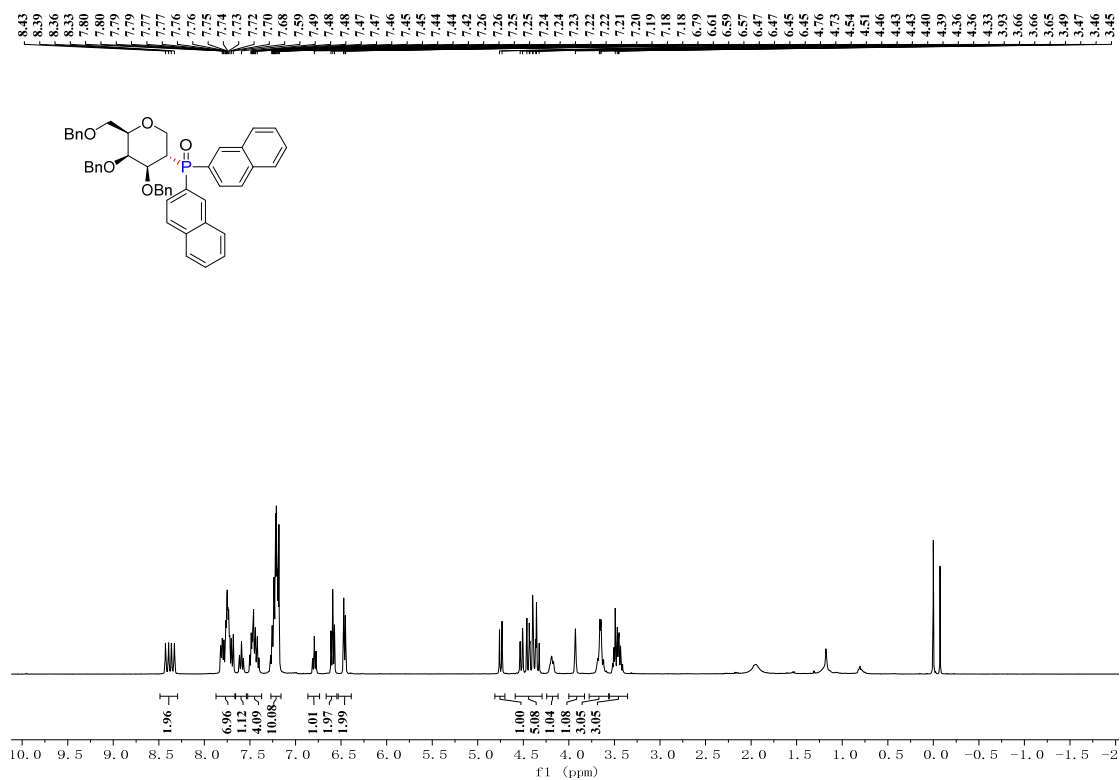

**$^{13}\text{C}$  NMR (CDCl<sub>3</sub>, 100 MHz) of 4e**

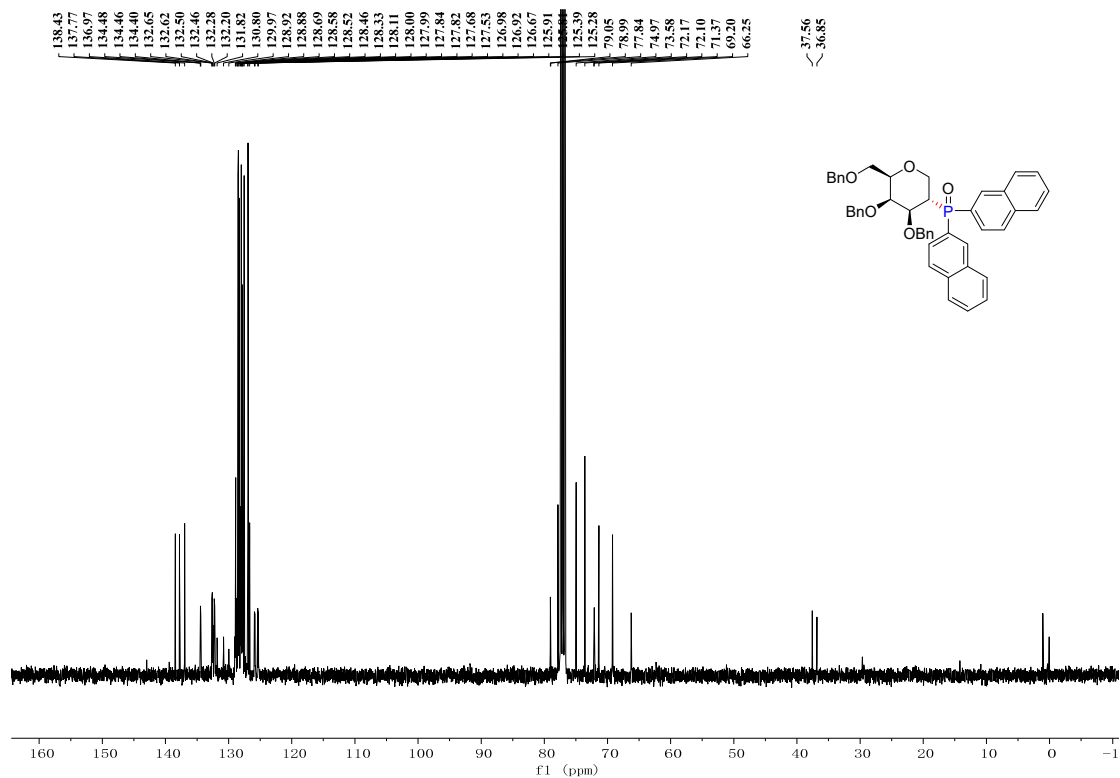



**$^{31}\text{P}$  NMR (CDCl<sub>3</sub>, 162 MHz) of **4e****

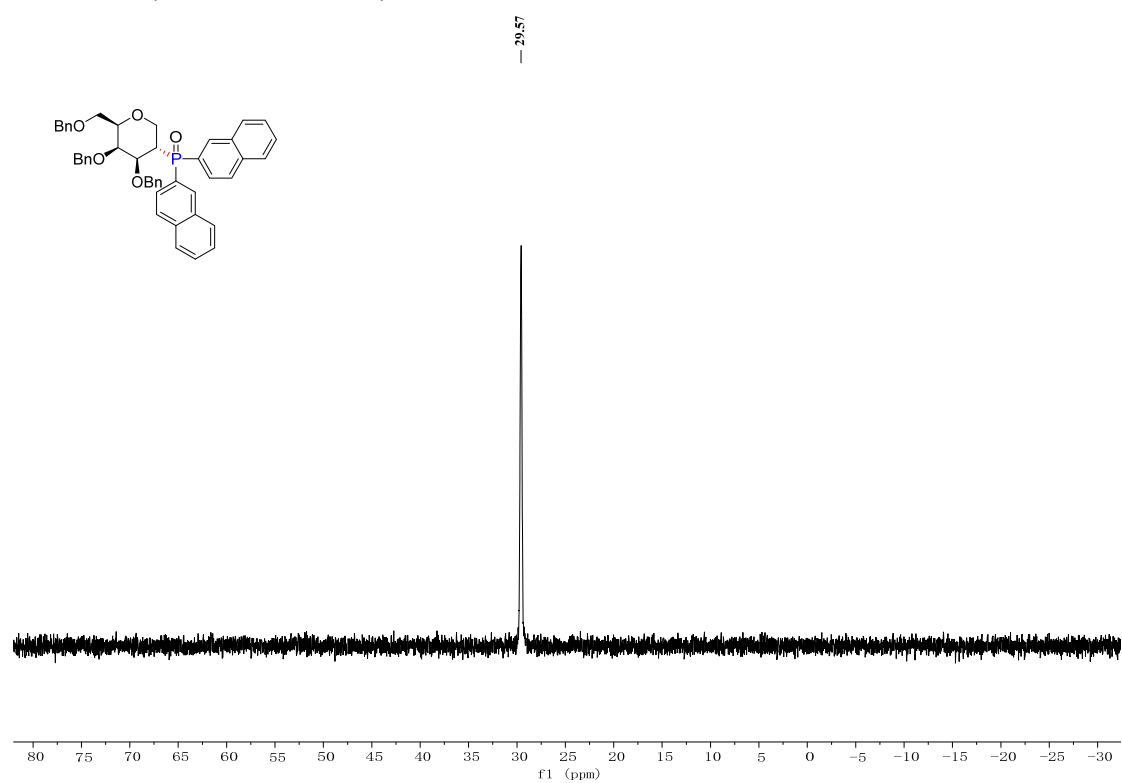

**$^1\text{H}$  NMR (CDCl<sub>3</sub>, 400 MHz) of **4f****

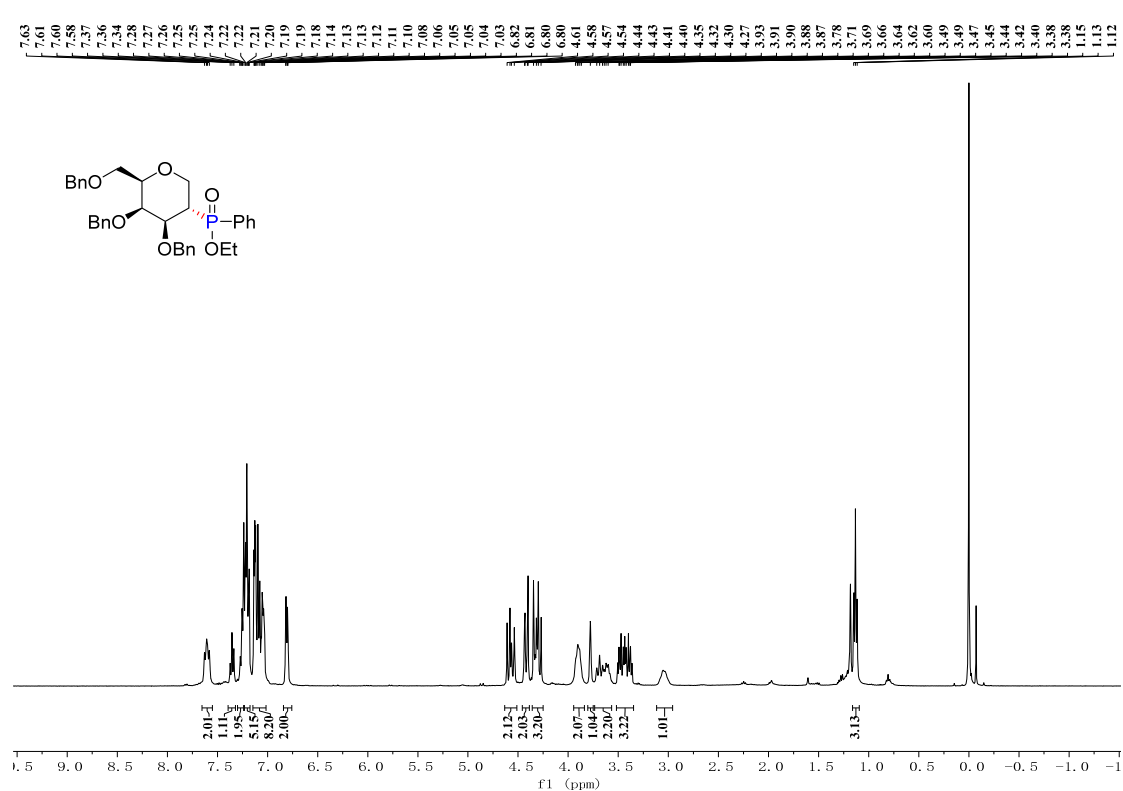



**$^{13}\text{C}$  NMR (CDCl<sub>3</sub>, 100 MHz) of 4f**

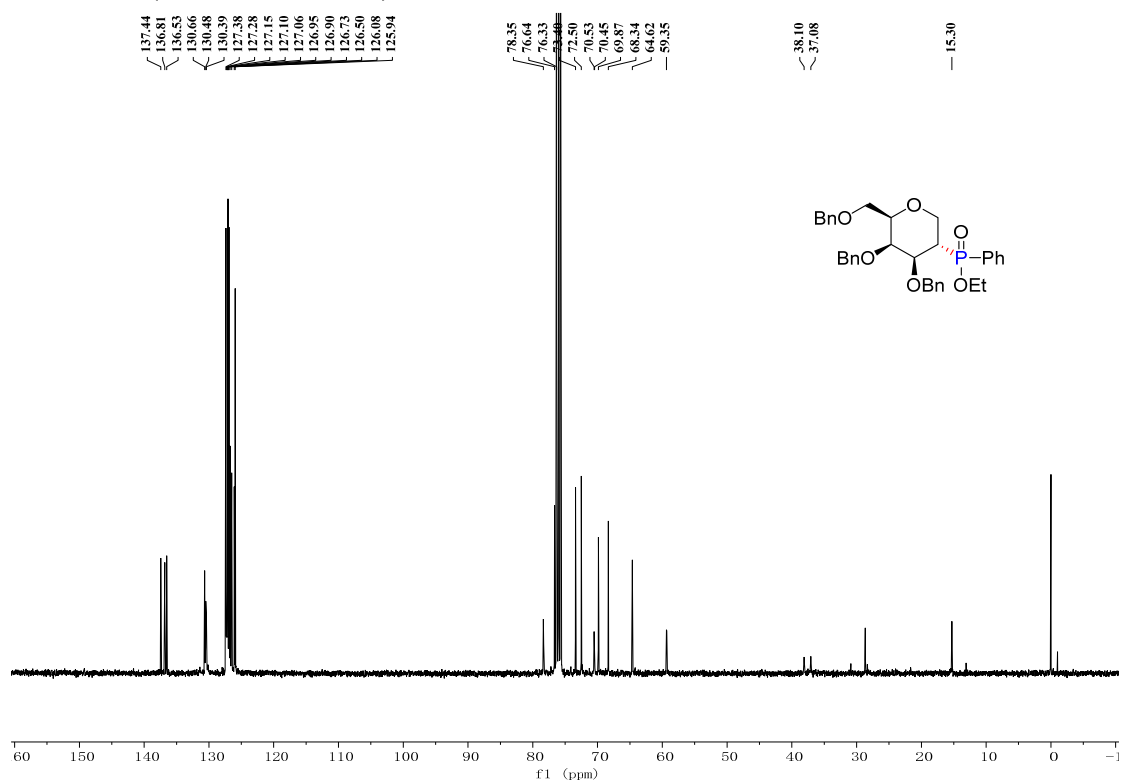

**$^{31}\text{P}$  NMR (CDCl<sub>3</sub>, 162 MHz) of 4f**

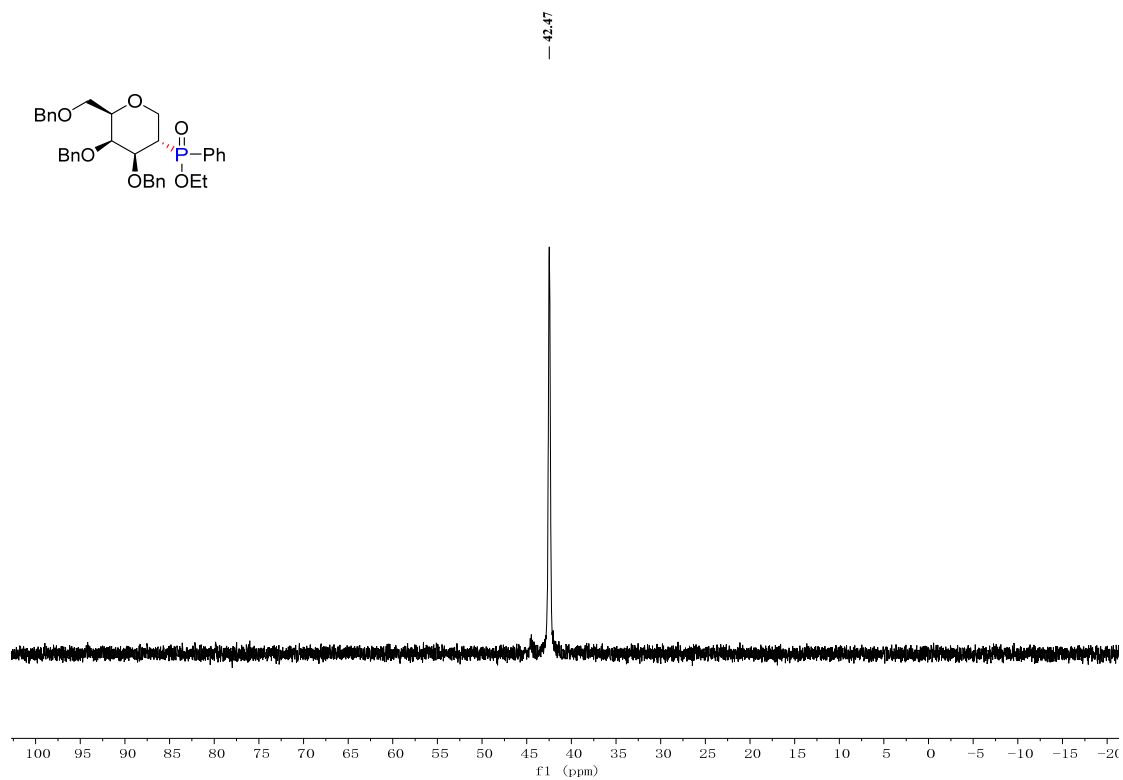



Chemical structure of compound 10: CCN(CC)S(=O)(=O)c1ccc(cc1)C(=O)O[C@H]2C=C[C@@H](COc3ccccc3)[C@H]2O

<sup>1</sup>H NMR spectrum (CDCl<sub>3</sub>) of compound 10. The x-axis represents the chemical shift in ppm, ranging from 0.79 to 7.97. The spectrum shows several peaks corresponding to the structure, with integration values provided below the baseline.

Chemical shifts (ppm) listed on the right side of the spectrum:

- 7.97, 7.95, 7.76, 7.74, 7.30, 7.28, 7.26, 7.24, 7.22, 7.21, 7.17, 6.43, 6.41, 5.66, 5.65, 5.64, 4.80, 4.79, 4.78, 4.65, 4.62, 4.52, 4.49, 4.49, 4.49, 4.47, 4.45, 4.42, 4.33, 4.32, 4.31, 4.30, 4.29, 4.09, 4.08, 4.07, 3.83, 3.81, 3.80, 3.78, 3.65, 3.64, 3.63, 3.05, 3.03, 3.02, 3.01, 1.53, 1.51, 1.49, 1.48, 1.46, 1.44, 0.82, 0.81, 0.79.

Integration values (from left to right): 2.04, 2.04, 5.02, 5.03, 1.00, 1.01, 0.99, 1.01, 3.09, 1.00, 1.01, 1.00, 4.07, 4.20, 6.19.

Chemical structure of the compound is shown above the spectrum. The structure is a substituted tetrahydropyran with a benzyl group, a benzyl ether, and a benzoyl group. The spectrum shows peaks corresponding to the structure, with the following chemical shifts (ppm) labeled above the peaks:

163.80, 145.10, 143.34, 136.78, 136.51, 132.21, 129.21, 127.43, 126.88, 126.82, 126.80, 126.00, 96.99, 74.39, 72.49, 72.25, 69.92, 66.41, 64.52, 48.95, 20.96, 10.15.

Chemical structure of the compound is shown above the spectrum. The structure is a substituted tetrahydropyran with a benzyl group, a benzyl ether, and a benzoyl group. The spectrum shows peaks corresponding to the structure, with the following chemical shifts (ppm) labeled above the peaks:

163.80, 145.10, 143.34, 136.78, 136.51, 132.21, 129.21, 127.43, 126.88, 126.82, 126.80, 126.00, 96.99, 74.39, 72.49, 72.25, 69.92, 66.41, 64.52, 48.95, 20.96, 10.15.



## 6. Structure Determination and Representative 2D NMR Spectra

To determine the stereochemistry of the anomeric carbon, one compound from each sugar class was selected for detailed NMR analyses. Firstly, most meaningful protons were assigned with the aid of COSY and HSQC. Then, characteristic NOE signals between H-2 adjacent to the hydrogens on the sugar ring were identified as shown in the following spectra. The structures of 3m-3t were confirmed unambiguously by relating to their corresponding fully protected products presented in Table 2 as well as NOE experiments.

### Protective group conversion experiments

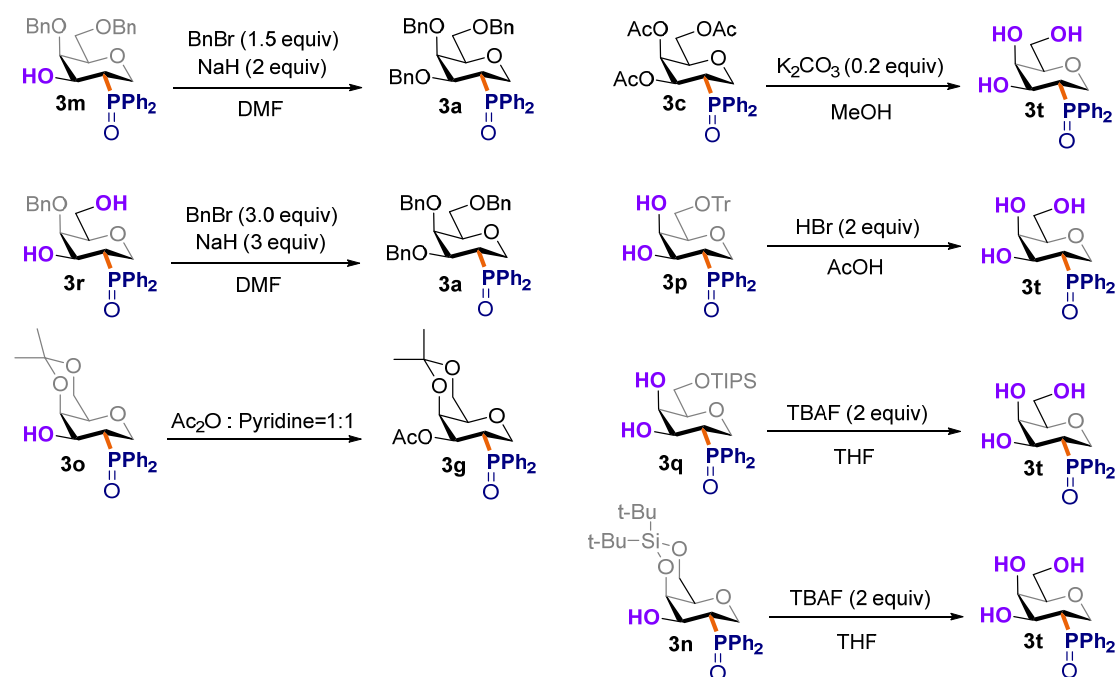



$^1\text{H}$ - $^1\text{H}$  HSQC ( $\text{CDCl}_3$ , 400MHz) of **3d**

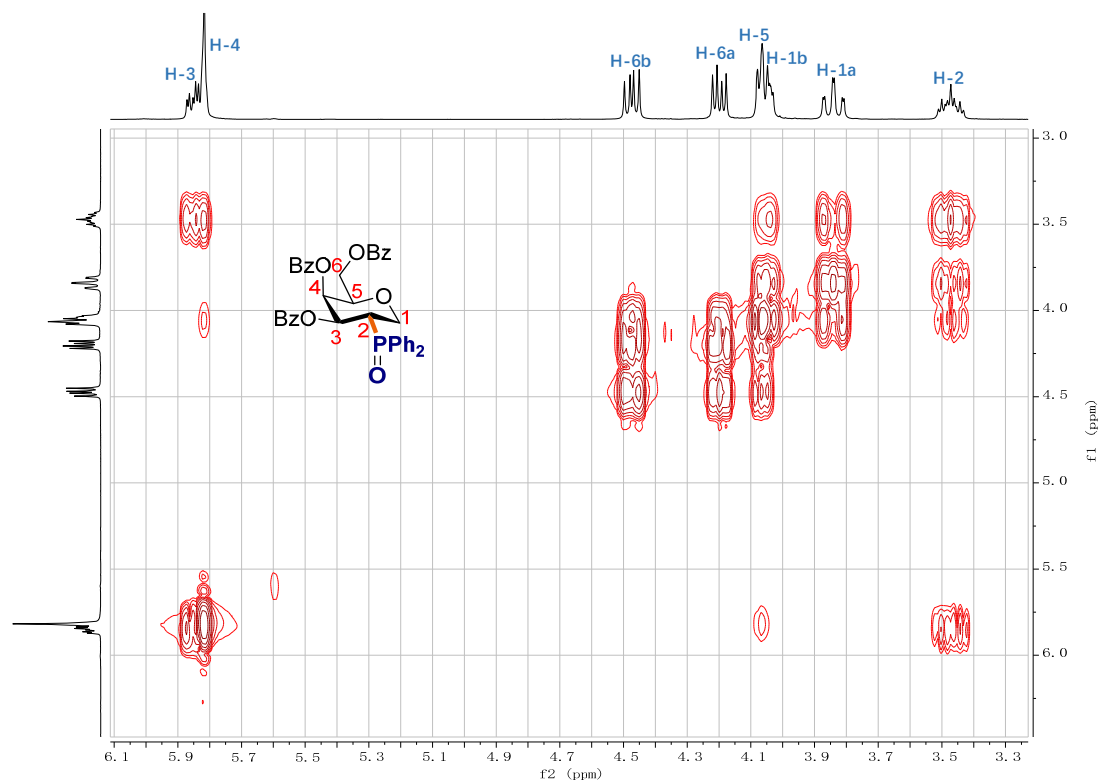

$^1\text{H}$ - $^{13}\text{C}$  HSQC ( $\text{CDCl}_3$ , 400MHz) of **3d**

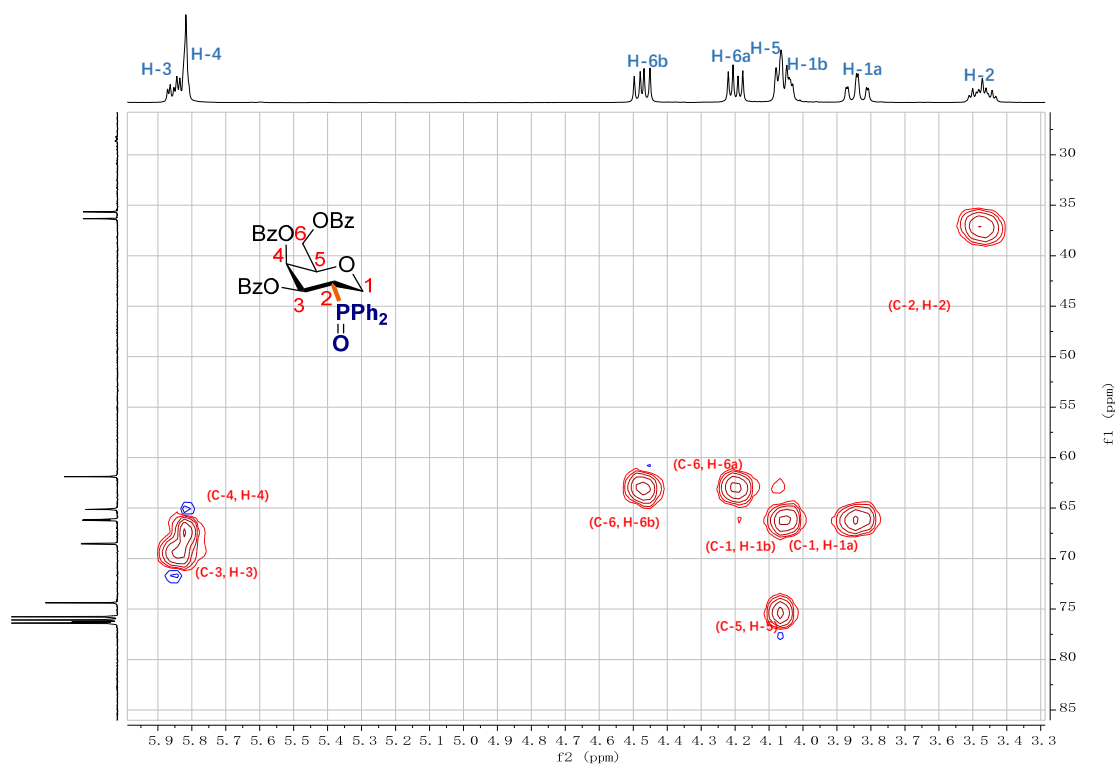



**$^1\text{H}$ - $^1\text{H}$  NOESY (CDCl<sub>3</sub>, 400MHz) of **3d****

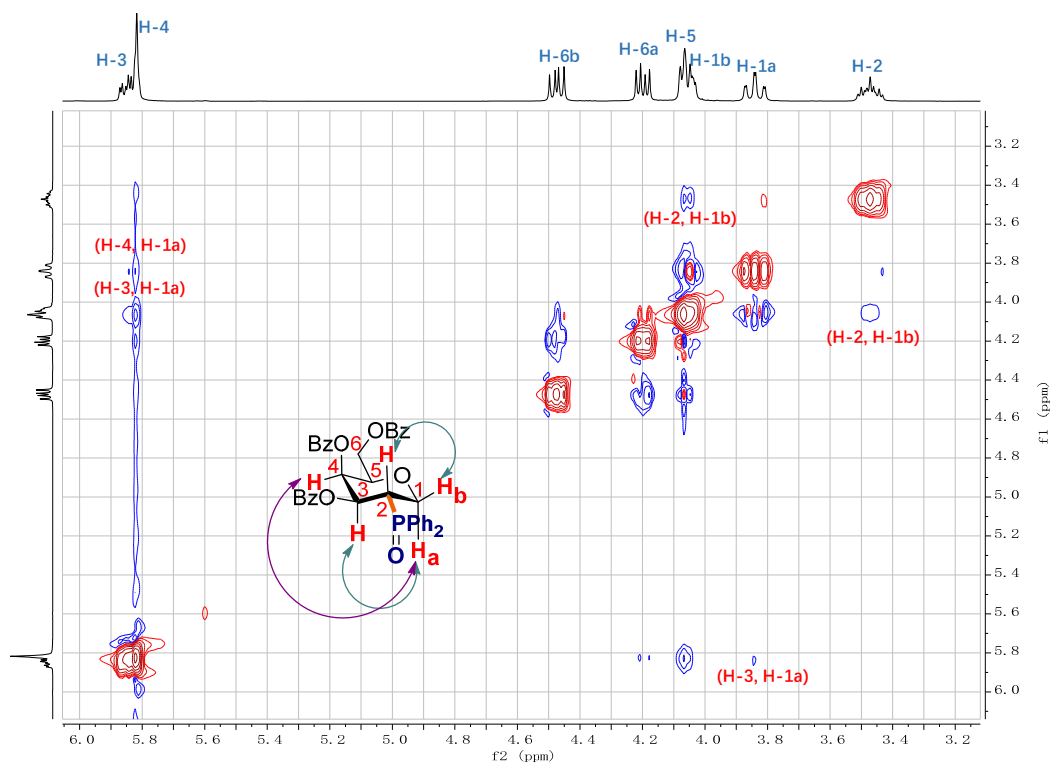

**$^1\text{H}$ - $^1\text{H}$  HSQC (CDCl<sub>3</sub>, 400MHz) of **3f****

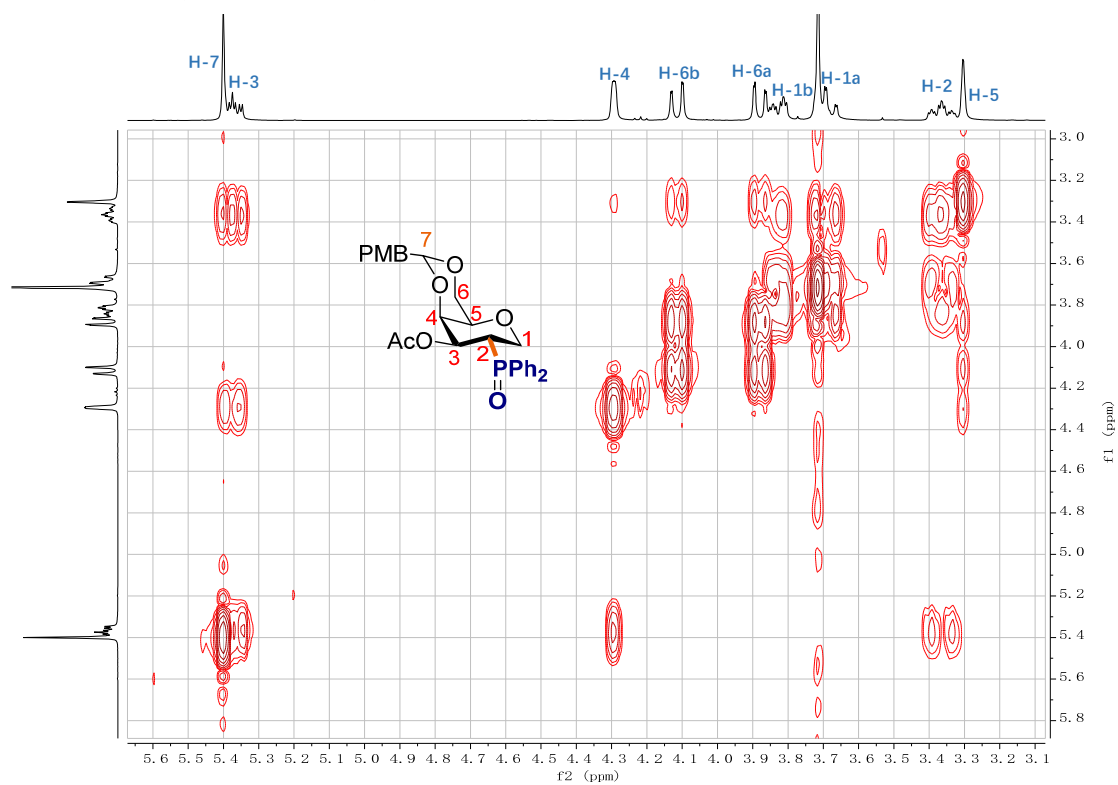



$^1\text{H}$ - $^{13}\text{C}$  HSQC ( $\text{CDCl}_3$ , 400MHz) of **3f**

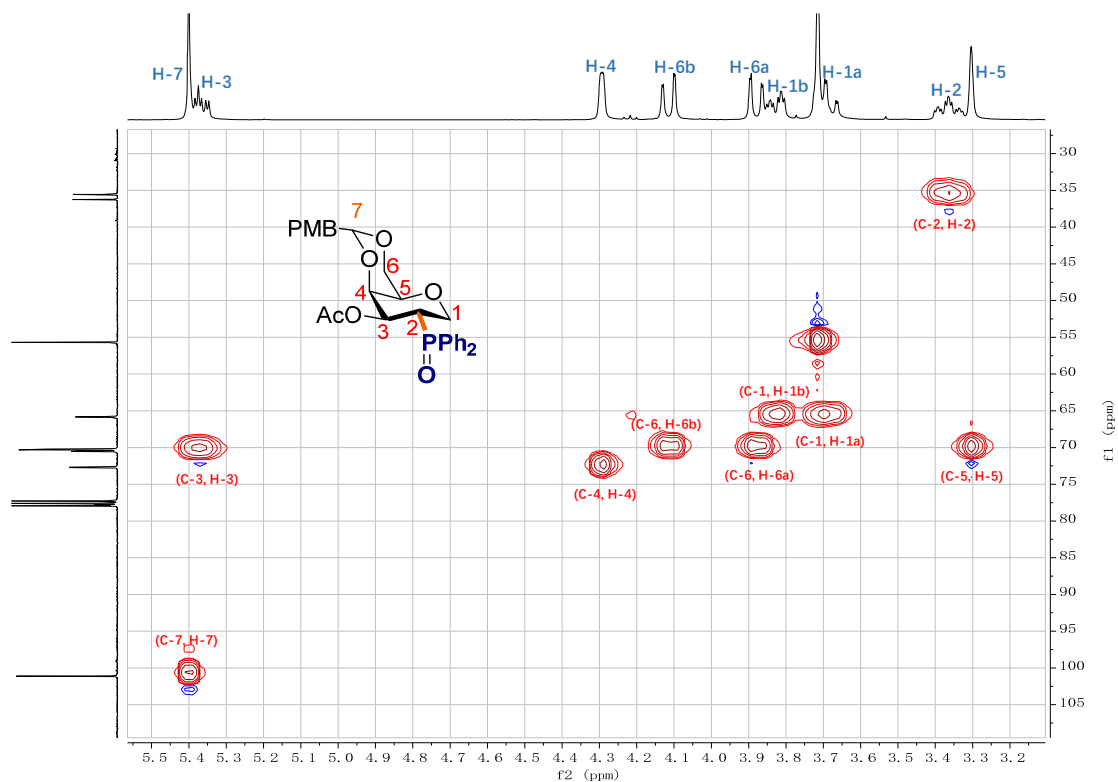

$^1\text{H}$ - $^1\text{H}$  NOESY ( $\text{CDCl}_3$ , 400MHz) of **3f**

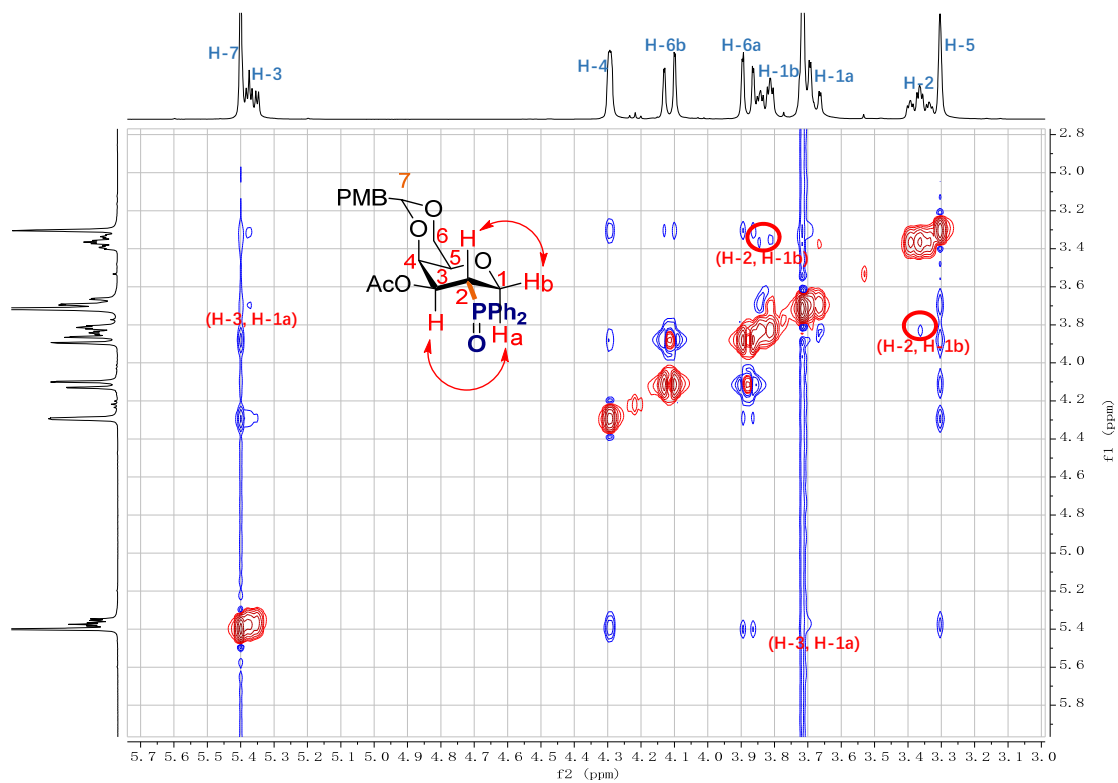



**$^1\text{H}$ - $^1\text{H}$  COSY (CDCl<sub>3</sub>, 400MHz) of **3i****

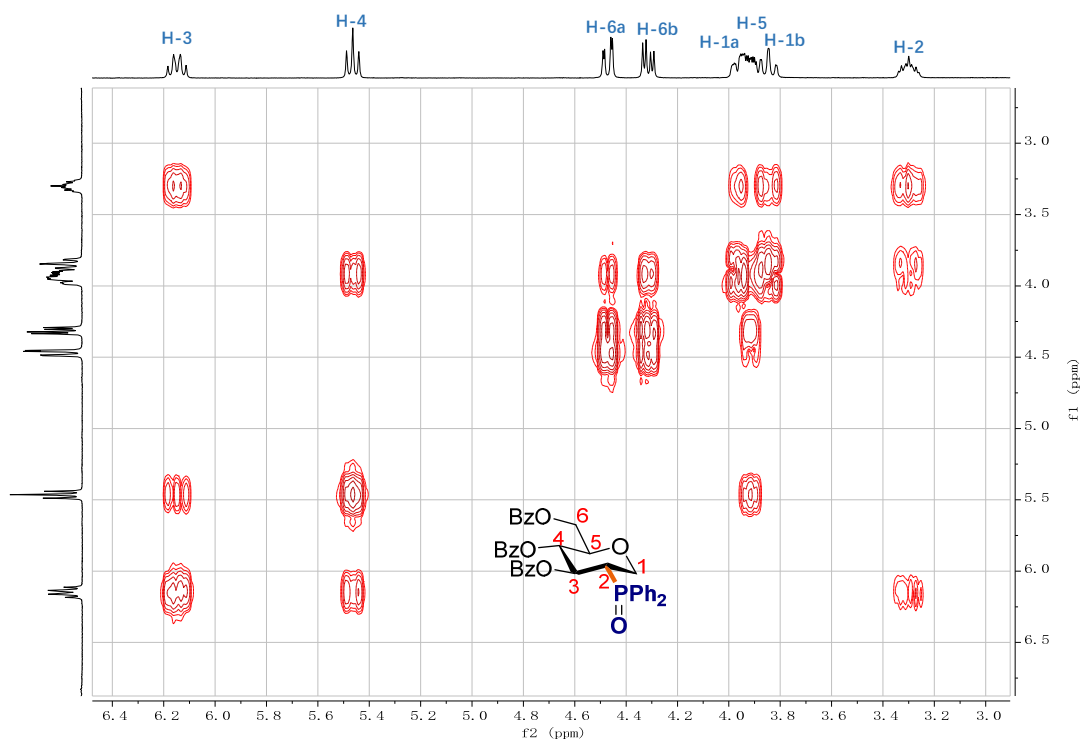

**$^1\text{H}$ - $^{13}\text{C}$  HSQC (CDCl<sub>3</sub>, 400MHz) of **3i****

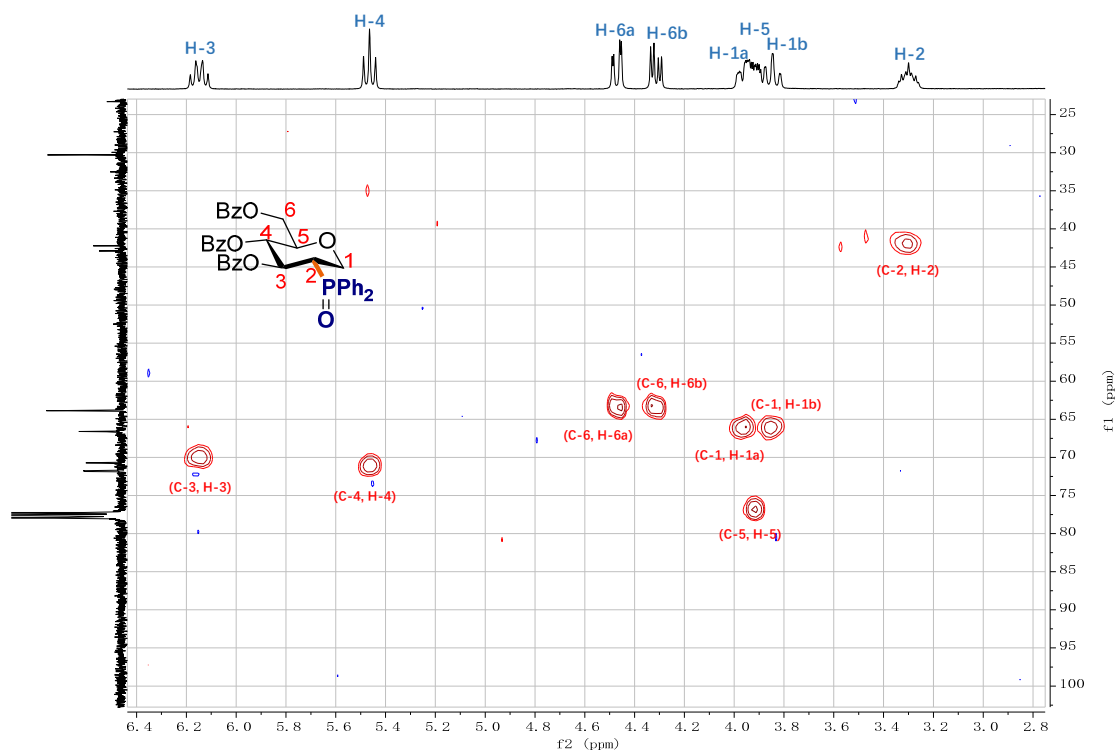



$^1\text{H}$ - $^1\text{H}$  NOESY ( $\text{CDCl}_3$ , 400MHz) of **3i**

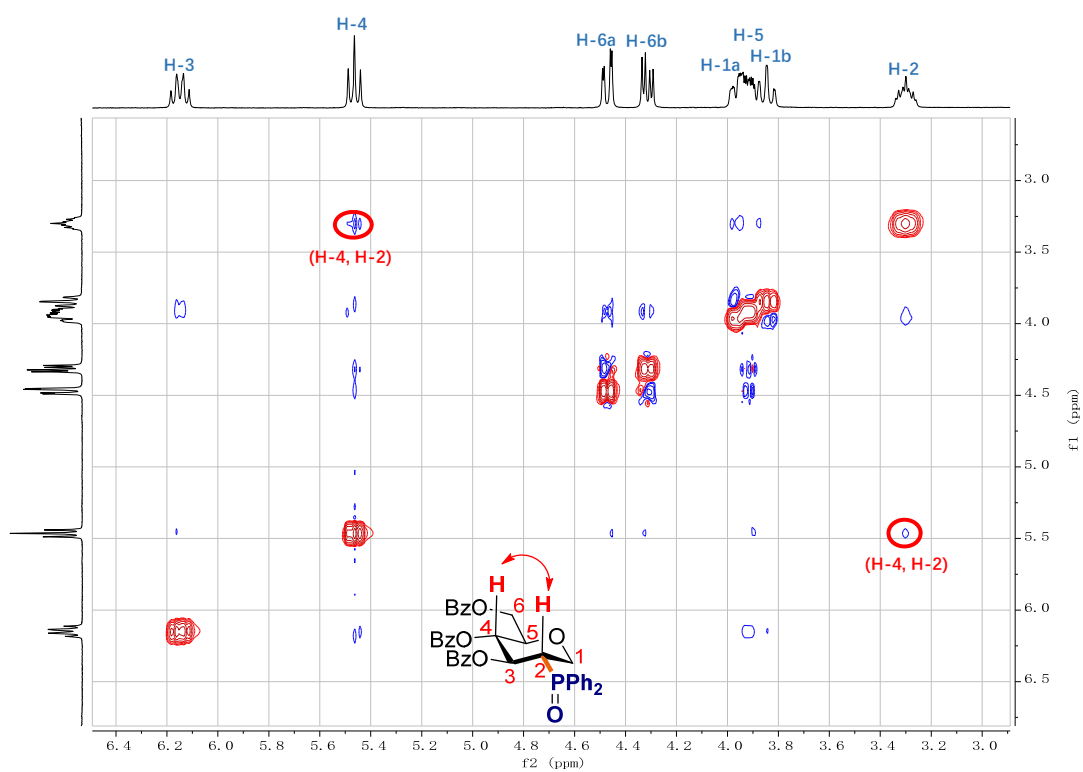

$^1\text{H}$ - $^1\text{H}$  COSY ( $\text{CDCl}_3$ , 400MHz) of **3i**

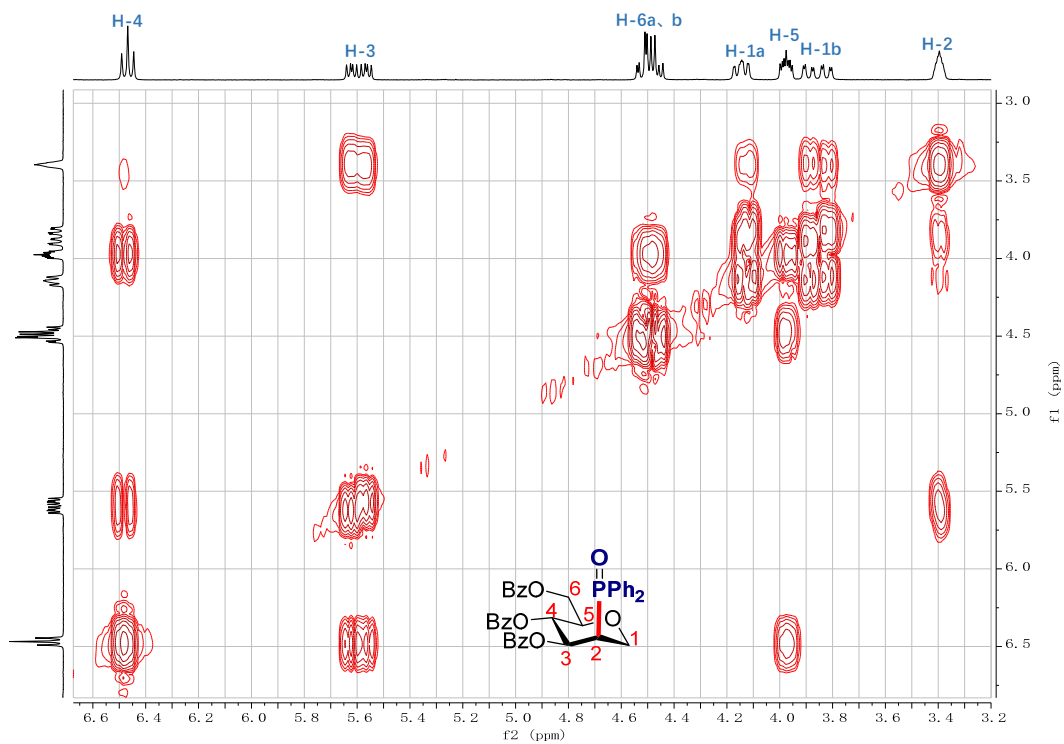

$^1\text{H}$ - $^{13}\text{C}$  HSQC ( $\text{CDCl}_3$ , 400MHz) of **3i**



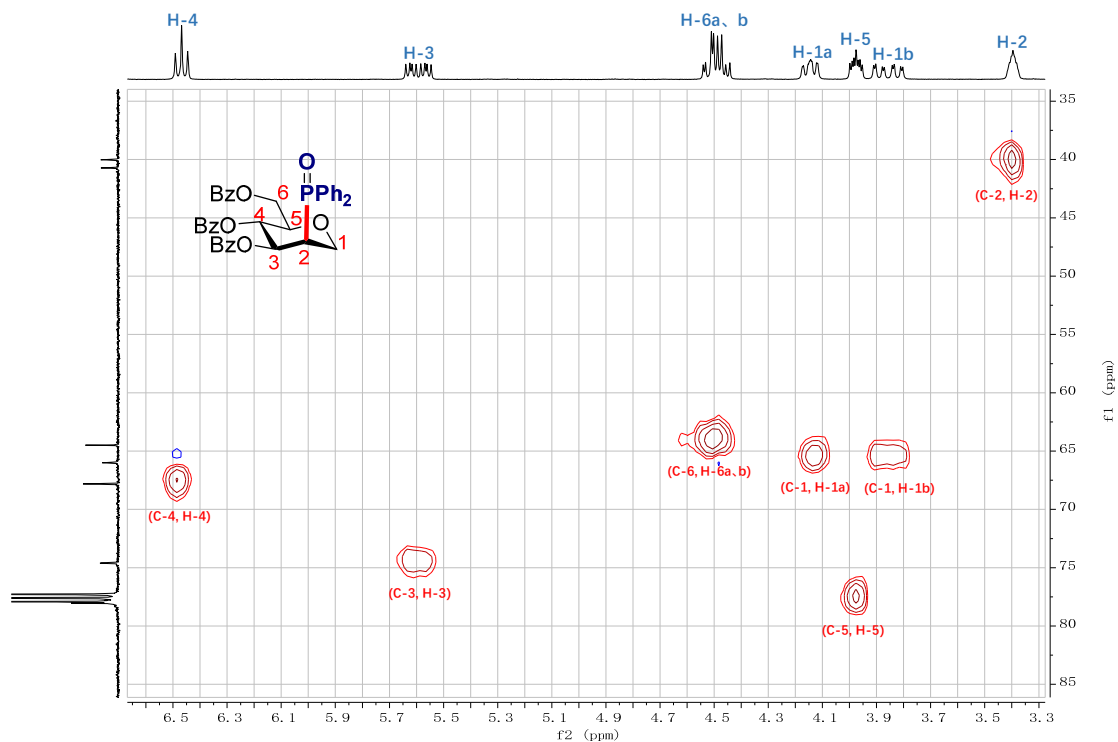

**<sup>1</sup>H-<sup>1</sup>H NOESY (CDCl<sub>3</sub>, 400MHz) of 3i'**

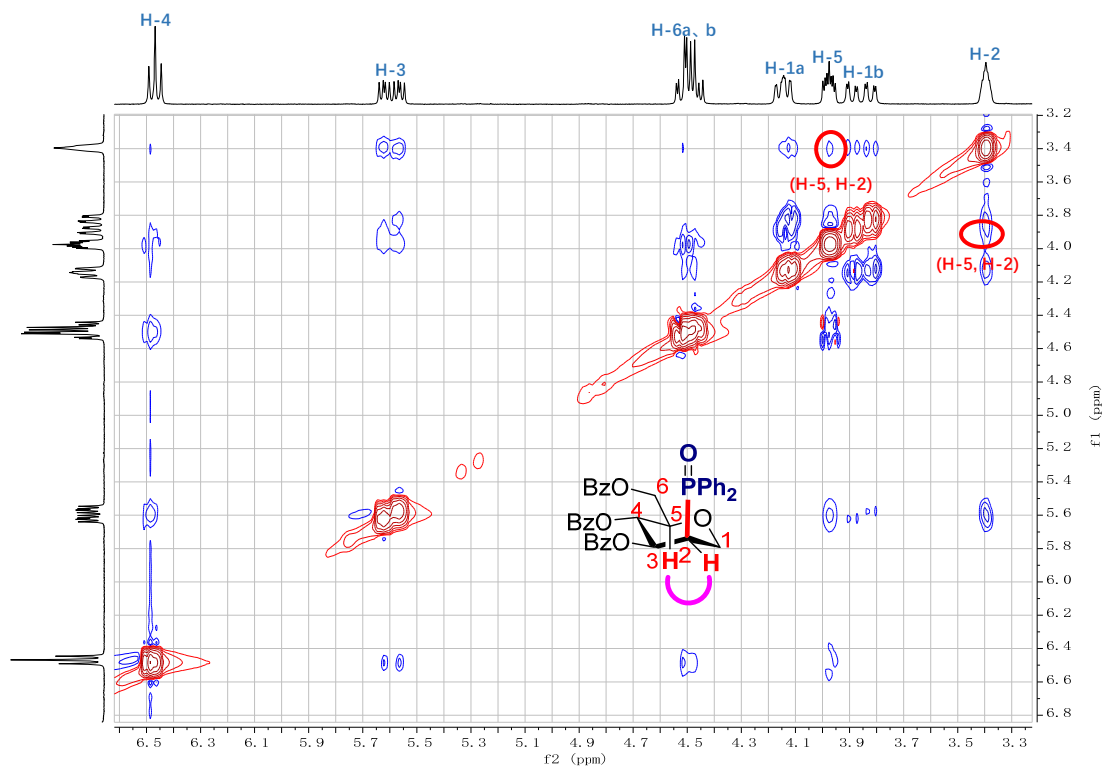



**$^1\text{H}$ - $^1\text{H}$  COSY (CDCl<sub>3</sub>, 400MHz) of **3h****

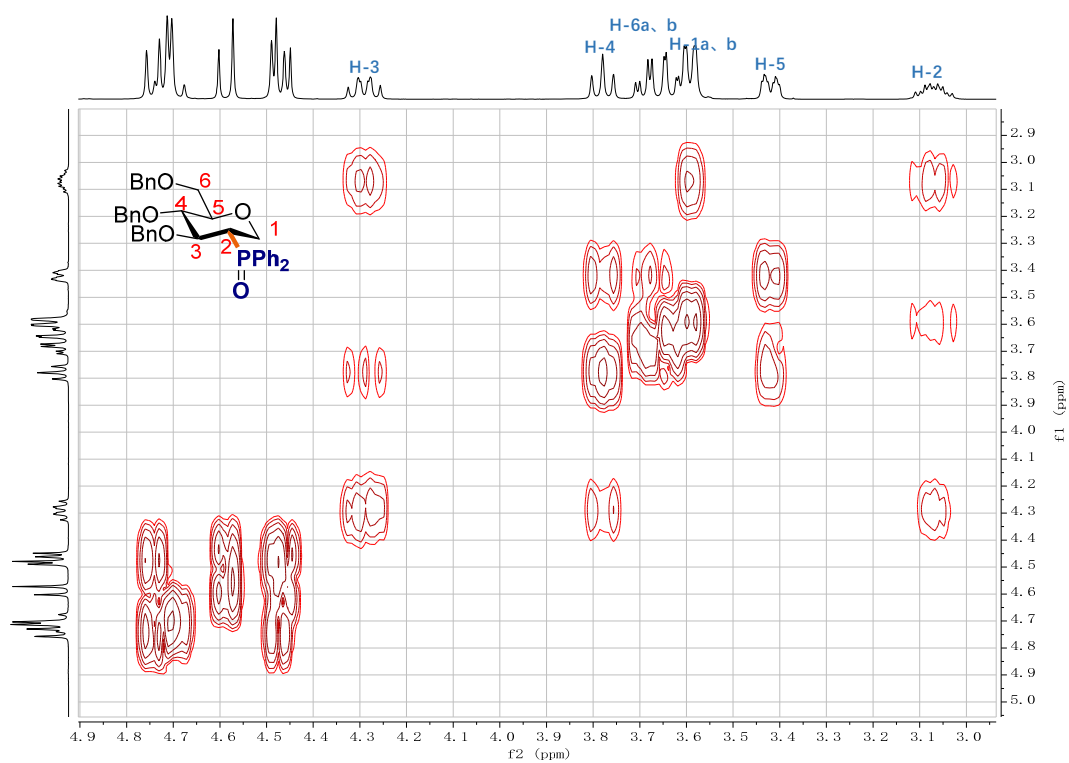

**$^1\text{H}$ - $^{13}\text{C}$  HSQC (CDCl<sub>3</sub>, 400MHz) of **3h****

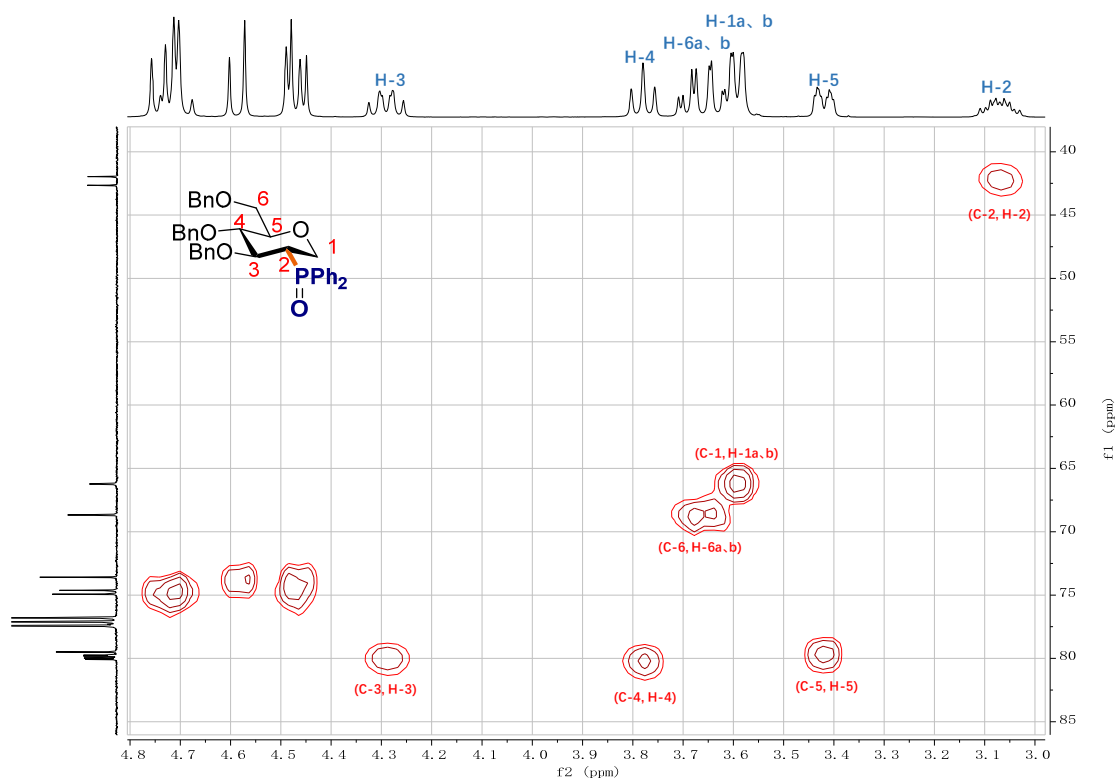



**$^1\text{H}$ - $^1\text{H}$  NOESY (CDCl<sub>3</sub>, 400MHz) of **3h****

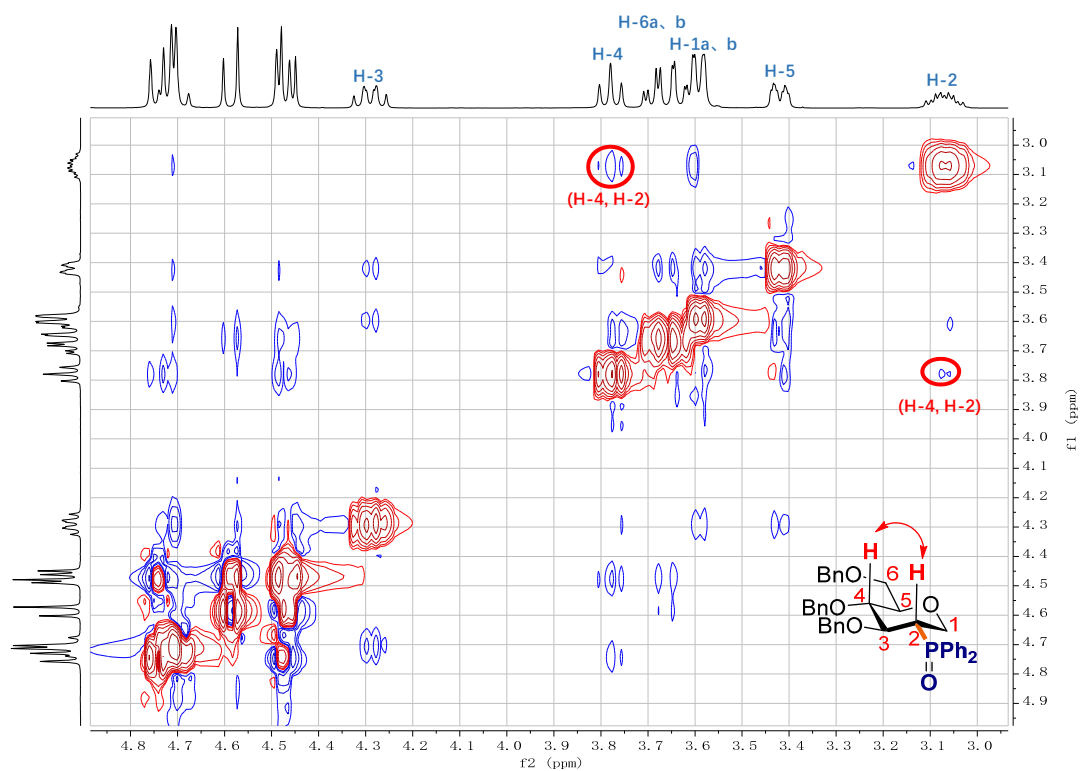

**$^1\text{H}$ - $^1\text{H}$  COSY (CDCl<sub>3</sub>, 400MHz) of **3h****

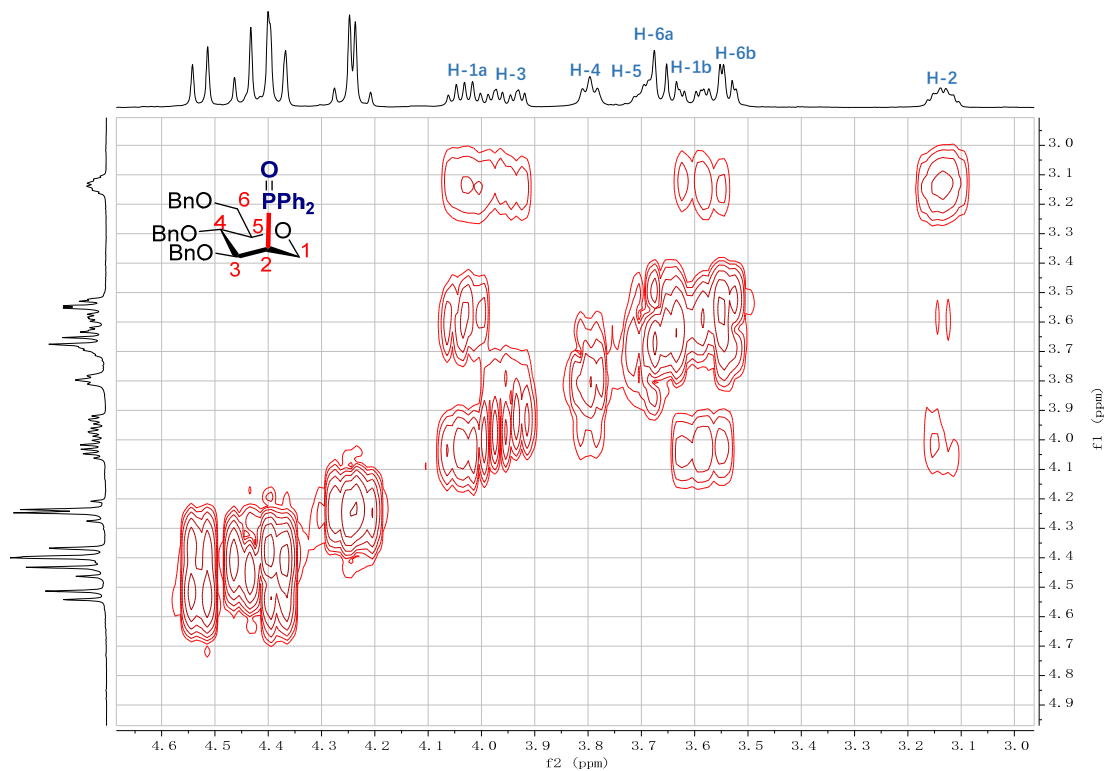



Chemical structure of compound 1 is shown in the upper left of the 2D plot area. The structure is a substituted cyclohexane with a phosphate group (PPh<sub>2</sub>) at C-1, a benzoyloxy group (BnO) at C-2, and a benzoyloxy group (BnO) at C-3. The carbons are numbered 1 through 6, and the protons are labeled H-1a, H-1b, H-2, H-3, H-4, H-5, H-6a, and H-6b.

The 2D COSY spectrum shows correlations between the following proton pairs:

- (C-1, H-1a)
- (C-1, H-1b)
- (C-6, H-6a)
- (C-6, H-6b)
- (C-4, H-4)
- (C-5, H-5)
- (C-3, H-3)
- (C-2, H-2)



**$^1\text{H}$ - $^1\text{H}$  COSY (CDCl<sub>3</sub>, 400MHz) of **3k****

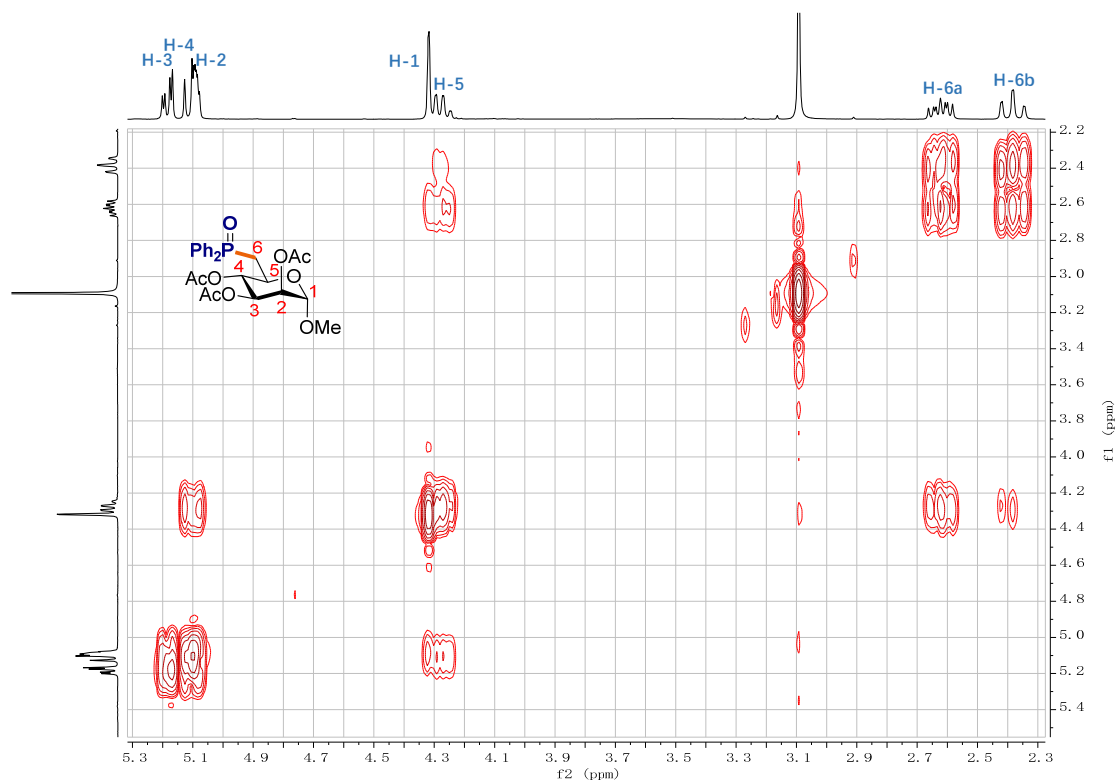

**$^1\text{H}$ - $^{13}\text{C}$  HSQC (CDCl<sub>3</sub>, 400MHz) of **3k****

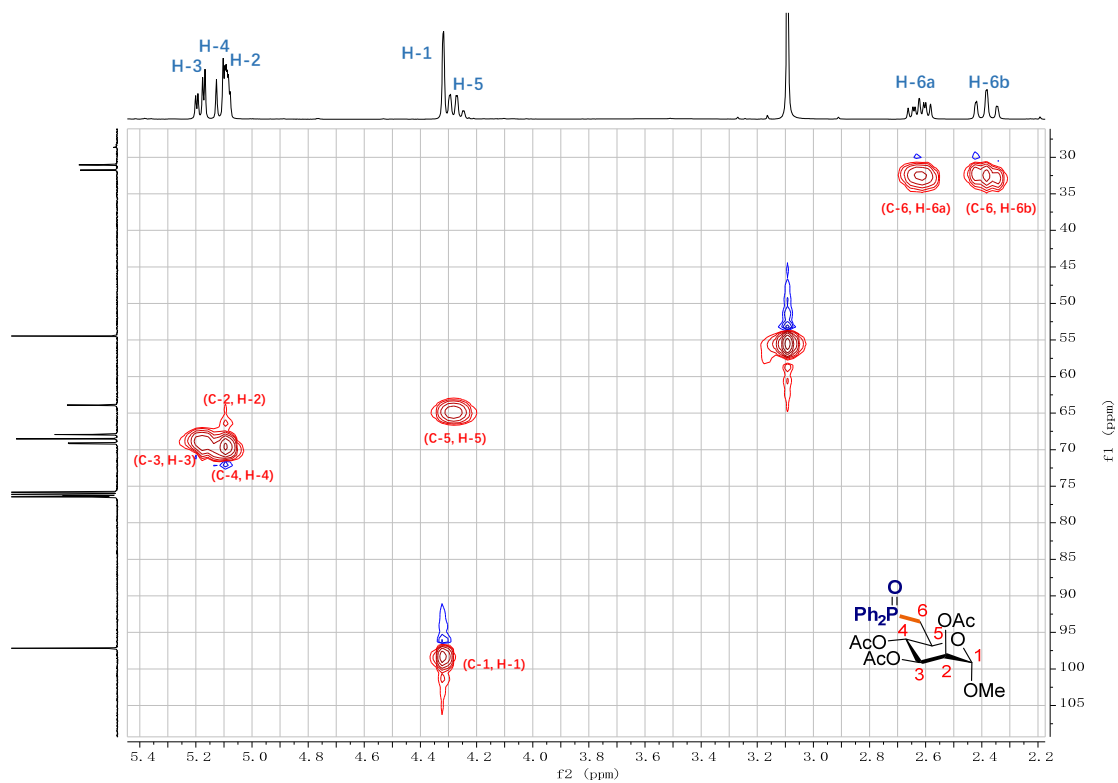



$^1\text{H}$ - $^1\text{H}$  NOESY ( $\text{CDCl}_3$ , 400MHz) of **3k**

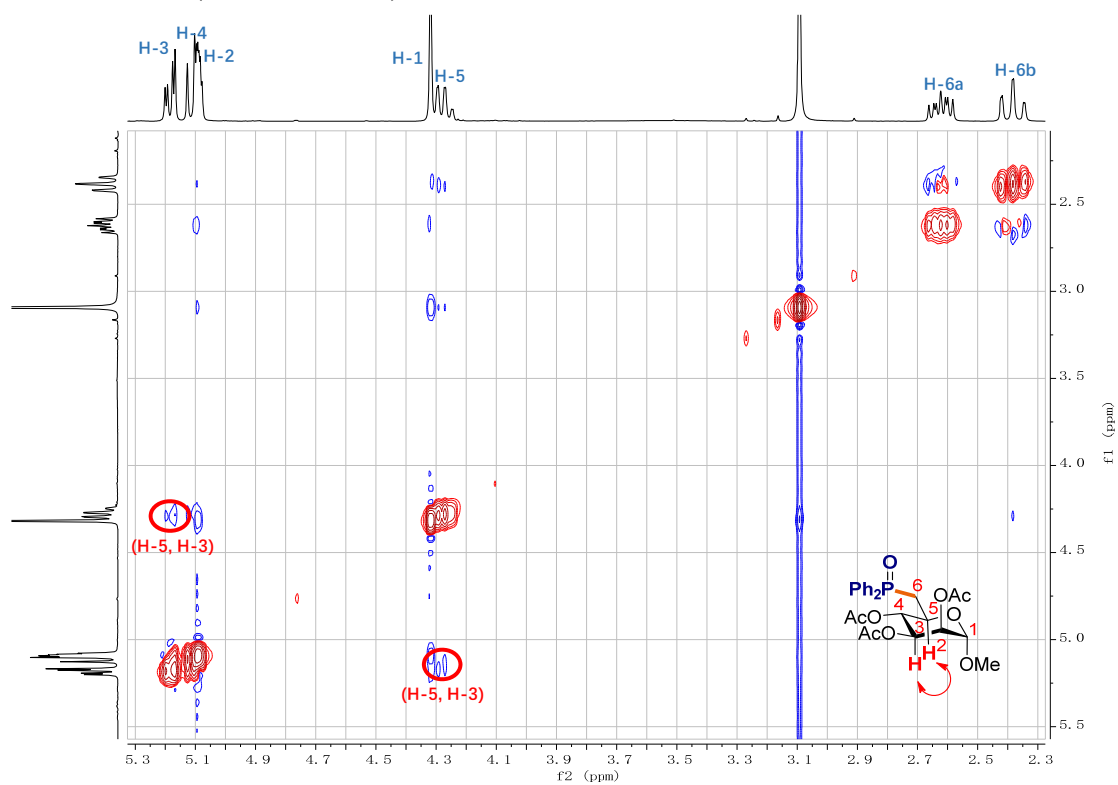

$^1\text{H}$ - $^1\text{H}$  COSY ( $\text{CDCl}_3$ , 400MHz) of **3s**

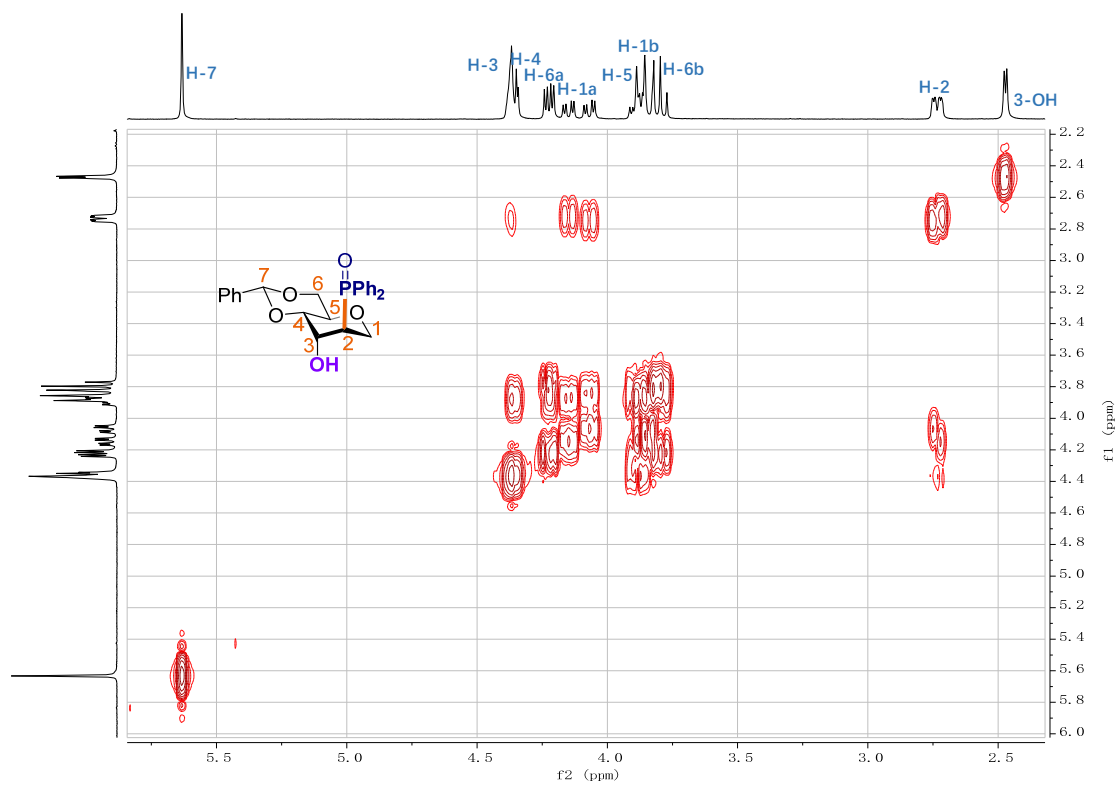



$^1\text{H}$ - $^{13}\text{C}$  HSQC ( $\text{CDCl}_3$ , 400MHz) of **3s**

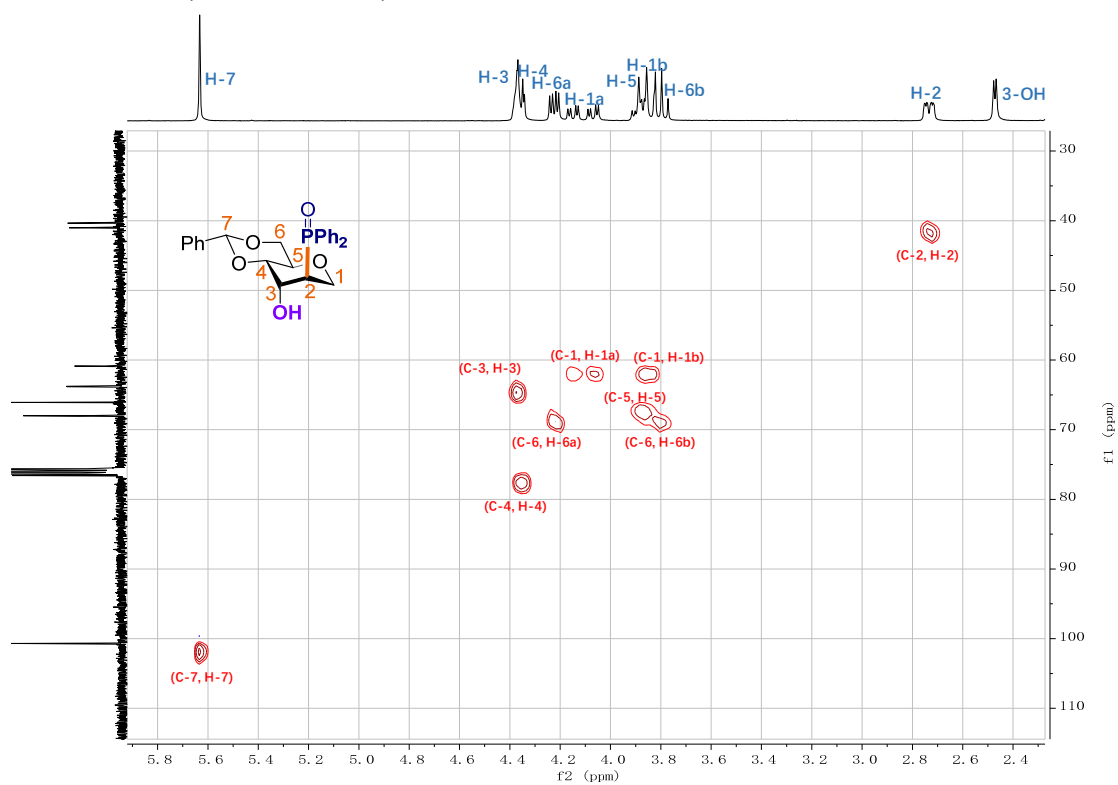

$^1\text{H}$ - $^1\text{H}$  NOESY ( $\text{CDCl}_3$ , 400MHz) of **3s**

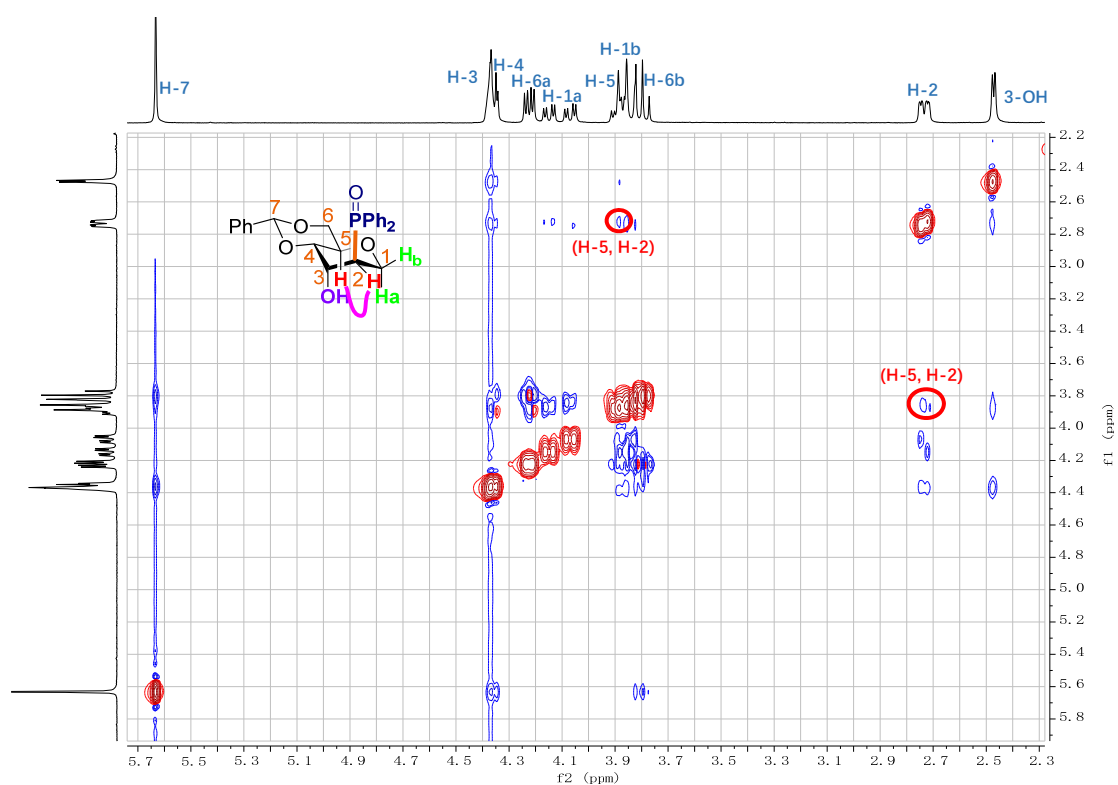



## 7. X-ray Structure of 3c, 3j

Single crystal was grown by slow evaporation method at room temperature using the petroleum ether: methanol solvent mixture (2:1, v/v) for 3c, 3j; The X-ray intensity data were collected at room temperature (296 K) on a Bruker SMART APEX II CCD diffractometer using Mo K $\alpha$  radiation ( $\lambda = 0.71073 \text{ \AA}$ ). Structure was solved by the direct method using the SHELXS97. All nonhydrogen atoms were refined by full-matrix least squares on F<sup>2</sup> using SHELXL-2014/7. All H atoms were placed at calculated ideal positions using a riding model approach. The ORTEP diagram was generated using the Mercury. CCDC 2123292, 2123293 contains the supplementary crystallographic data for this paper. These data can be obtained free of charge via [www.ccdc.cam.ac.uk/data\\_request/cif](http://www.ccdc.cam.ac.uk/data_request/cif), or by emailing [data\\_request@ccdc.cam.ac.uk](mailto:data_request@ccdc.cam.ac.uk), or by contacting The Cambridge Crystallographic Data Centre, Union Road, Cambridge CB2 1EZ, UK; fax: +44 1223 336033.

**Table S1.** Crystal data and structure refinement for 3c and 3j.

| Identification code             | 3c                                                                                                                        | 3j                                                                                                                     |
|---------------------------------|---------------------------------------------------------------------------------------------------------------------------|------------------------------------------------------------------------------------------------------------------------|
| Empirical formula               | C <sub>24</sub> H <sub>27</sub> O <sub>8</sub> P                                                                          | C <sub>23</sub> H <sub>27</sub> O <sub>6</sub> P                                                                       |
| Formula weight                  | 474.42                                                                                                                    | 430.41                                                                                                                 |
| Temperature                     | 293(2) K                                                                                                                  | 296(2) K                                                                                                               |
| Wavelength                      | 0.71073 Å                                                                                                                 | 0.71073 Å                                                                                                              |
| Crystal system                  | Orthorhombic                                                                                                              | Tetragonal                                                                                                             |
| Space group                     | P2 <sub>1</sub> 2 <sub>1</sub> 2 <sub>1</sub>                                                                             | P4 <sub>1</sub> 2 <sub>1</sub> 2                                                                                       |
| Unit cell dimensions            | a = 11.9882(7) Å $\alpha = 90^\circ$ .<br>b = 12.7368(8) Å $\beta = 90^\circ$ .<br>c = 16.1339(9) Å $\gamma = 90^\circ$ . | a = 9.4927(5) Å $\alpha = 90^\circ$ .<br>b = 9.4927(5) Å $\beta = 90^\circ$ .<br>c = 47.965(5) Å $\gamma = 90^\circ$ . |
| Volume                          | 2463.5(3) Å <sup>3</sup>                                                                                                  | 4322.2(6) Å <sup>3</sup>                                                                                               |
| Z                               | 4                                                                                                                         | 8                                                                                                                      |
| Density (calculated)            | 1.279 Mg/m <sup>3</sup>                                                                                                   | 1.323 Mg/m <sup>3</sup>                                                                                                |
| Absorption coefficient          | 0.156 mm <sup>-1</sup>                                                                                                    | 0.164 mm <sup>-1</sup>                                                                                                 |
| F(000)                          | 1000                                                                                                                      | 1824                                                                                                                   |
| Crystal size                    | 0.180 x 0.160 x 0.150 mm <sup>3</sup>                                                                                     | 0.190 x 0.180 x 0.150 mm <sup>3</sup>                                                                                  |
| Theta range for data collection | 3.399 to 25.496°.                                                                                                         | 2.187 to 25.496°.                                                                                                      |
| Index ranges                    | -14 ≤ h ≤ 14, -15 ≤ k ≤ 15, -19 ≤ l ≤ 19                                                                                  | -11 ≤ h ≤ 11, -11 ≤ k ≤ 11, -58 ≤ l ≤ 58                                                                               |
| Reflections collected           | 20045                                                                                                                     | 33464                                                                                                                  |
| Independent reflections         | 4583 [R(int) = 0.0295]                                                                                                    | 4035 [R(int) = 0.0434]                                                                                                 |
| Completeness to theta = 25.242° | 99.7 %                                                                                                                    | 99.9 %                                                                                                                 |
| Absorption correction           | None                                                                                                                      | None                                                                                                                   |



|                                   |                                             |                                             |
|-----------------------------------|---------------------------------------------|---------------------------------------------|
| Refinement method                 | Full-matrix least-squares on F <sup>2</sup> | Full-matrix least-squares on F <sup>2</sup> |
| Data / restraints / parameters    | 4583 / 0 / 301                              | 4035 / 0 / 275                              |
| Goodness-of-fit on F <sup>2</sup> | 1.047                                       | 1.145                                       |
| Final R indices [I>2sigma(I)]     | R1 = 0.0420, wR2 = 0.1002                   | R1 = 0.0454, wR2 = 0.0966                   |
| R indices (all data)              | R1 = 0.0476, wR2 = 0.1033                   | R1 = 0.0505, wR2 = 0.0988                   |
| Absolute structure parameter      | 0.02(4)                                     | -0.01(17)                                   |
| Extinction coefficient            | n/a                                         | n/a                                         |
| Largest diff. peak and hole       | 0.198 and -0.178 e.Å <sup>-3</sup>          | 0.196 and -0.265 e.Å <sup>-3</sup>          |

### compound **3c**

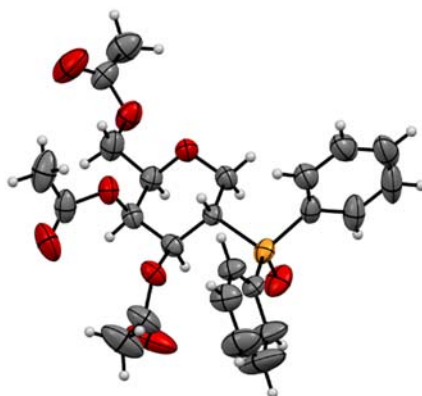

Figure S1. ORTEP diagram of the compound **3c**, Thermal ellipsoids are drawn at the 50% probability level.

### compound **3j**

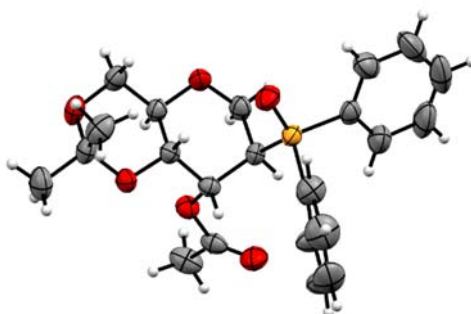

Figure S2. ORTEP diagram of the compound **3j**, Thermal ellipsoids are drawn at the 50% probability level.
